# Supplementary material for: Enantioselective synthesis of functionalized 3,4-disubstituted dihydro-2(1H)-quinolinones via Michael–hemiaminalization/oxidation reaction
Source: Royal Society of Chemistry journal article supplement (doi:10.1039/c4nj01718h), 2015-01-01
Supplement: c4nj01718h1.pdf [file c4nj01718h1.pdf]

# Supporting Information

## **Enantioselective Synthesis of Functionalized 3,4- Disubstituted Dihydro-2(1*H*)-quinolinones via Michael– Hemiaminalization/Oxidation Reaction**

Ai-Bao Xia,<sup>[a]</sup> Xiao-Long Zhang,<sup>[a]</sup> Tao Wang,<sup>[a]</sup> Xiao-Hua Du,<sup>[a]</sup>  
Dan-Qian Xu,<sup>[a, \*]</sup> and Zhen-Yuan Xu<sup>[a, \*]</sup>

<sup>[a]</sup> Catalytic Hydrogenation Research Centre, State Key Laboratory Breeding Base of  
Green Chemistry-Synthesis Technology, Zhejiang University of Technology,  
Hangzhou 310014, People's Republic of China

<sup>[b]</sup> Department of Pharmaceutical and Chemical Engineering, Taizhou College, Linhai  
Zhejiang 317000, People's Republic of China

Fax (+86) 0571 88320066;

E-mail: [chrc@zjut.edu.cn](mailto:chrc@zjut.edu.cn); [greenchem@zjut.edu.cn](mailto:greenchem@zjut.edu.cn).

|          | <b>Table of Contents</b>                                                                                 | <b>Page</b>      |
|----------|----------------------------------------------------------------------------------------------------------|------------------|
| <b>1</b> | <b>General information</b>                                                                               | <b>S2</b>        |
| <b>2</b> | <b>Typical procedure for the organocatalytic asymmetric Michael–hemiaminalization/oxidation reaction</b> | <b>S3 ~ S11</b>  |
| <b>3</b> | <b>Typical procedure for one-pot synthesis of 6a</b>                                                     | <b>S12</b>       |
| <b>4</b> | <b>NMR spectra, H-H COSY and H-H NOESY spectra of 5q</b>                                                 | <b>S13 ~ S34</b> |
| <b>5</b> | <b>HPLC spectra</b>                                                                                      | <b>S35 ~ S55</b> |

## **1. General information**

The  $^1\text{H}$  NMR and  $^{13}\text{C}$  NMR spectra were recorded in  $\text{CDCl}_3$  or DMSO at 500 MHz and 125 MHz, respectively, with TMS as the internal standard. GC-MS experiments were performed on a GC system with a mass selective detector. HRMS data were measured on a LC/TOF-MS with ESI source. Column chromatography and flash chromatography experiments were performed on silica gel (200-300 mesh) eluting with ethyl ether and petroleum ether. TLC experiments were carried out on glass-backed silica plates. In each case, enantiomeric ratio was determined on a chiral column in comparison with authentic racemates by chiral HPLC. Chemicals were used without purification as commercially available.

## 2. Typical procedure for the organocatalytic asymmetric Michael–hemiaminalization/oxidation Reaction

Solvent (0.5 mL) was added to a mixture of nitroolefins **1** (0.1 mmol) with aldehydes **2** (0.3 mmol) in the presence of 20 mol% catalyst **3d** and 20 mol% PhCO<sub>2</sub>H **4a** at room temperature under vigorous stirring. After 1 day, the reaction mixture was extracted with DCM, washed with water, dried, and concentrated. The residue was purified by flash chromatography on silica gel (ethyl ether/petroleum ether = 1:4 as eluent) to yield products **5**. Then, **5** and DCM (2 mL) was added to a mixture of PCC (3 equiv.) with CH<sub>3</sub>CO<sub>2</sub>Na (3 equiv.) or Na<sub>2</sub>CO<sub>3</sub> (3 equiv.) at room temperature under vigorous stirring. After reaction completion, the residue was purified by flash chromatography on silica gel (ethyl ether/petroleum ether = 1:2 as eluent) to yield products **6**. Enantiomeric ratio was determined by HPLC analysis on a chiral column.

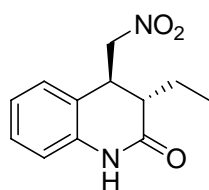

**Compound (6a)**, yield: 20.4 mg, 87 %; 99 % ee; > 99:1 dr; yellow oil; The enantiomeric excess was determined by HPLC on Daicel Chiralpak AD-H with hexane/i-PrOH (98:2) as the eluent, Flow: 1.0 mL/min; UV = 252 nm;  $t_{\text{major}}$  = 65.672 min,  $t_{\text{minor}}$  = 71.174; <sup>1</sup>H NMR (500 MHz, CDCl<sub>3</sub>):  $\delta$  = 9.38 (s, 1H), 7.29–7.26 (m, 1H), 7.21–7.19 (m, 1H), 7.06–7.03 (m, 1H), 6.92–6.89 (m, 1H), 4.53–4.43 (m, 2H), 3.73–3.70 (m, 1H), 2.51–2.48 (m, 1H), 1.72–1.64 (m, 1H), 1.55–1.46 (m, 1H), 1.06–1.02 (m, 3H) ppm; <sup>13</sup>C NMR (125 MHz, CDCl<sub>3</sub>):  $\delta$  = 172.2, 135.9, 129.4 ( $\times 2$ ), 124.1, 119.7, 116.1, 78.1, 45.6, 40.2, 23.7, 11.6 ppm; HRMS: (ESI+)  $m/z$  calcd for C<sub>12</sub>H<sub>15</sub>N<sub>2</sub>O<sub>3</sub> [M+H]<sup>+</sup> 235.1083, found 235.1094.

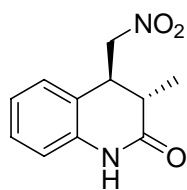

**Compound (6b)**, yield: 13.4 mg, 61 %; > 99 % ee; > 99:1 dr; yellow oil; The enantiomeric excess was determined by HPLC on Daicel Chiralpak OB-H with hexane/i-PrOH (95:5) as the eluent, Flow: 1.0 mL/min; UV = 252 nm;  $t_{\text{major}} = 50.489$  min;  $^1\text{H}$  NMR (500 MHz,  $\text{CDCl}_3$ ):  $\delta = 8.99$  (s, 1H), 7.30–7.26 (m, 1H), 7.22–7.20 (m, 1H), 7.08–7.05 (m, 1H), 6.90–6.88 (m, 1H), 4.53–4.42 (m, 2H), 3.60–3.57 (m, 1H), 2.76–2.70 (m, 1H), 1.26–1.25 (m, 3H) ppm;  $^{13}\text{C}$  NMR (125 MHz,  $\text{CDCl}_3$ ):  $\delta = 172.7, 136.6, 129.6, 129.5, 124.2, 119.5, 116.0, 78.0, 42.5, 38.6, 16.4$  ppm; HRMS: (ESI+)  $m/z$  calcd for  $\text{C}_{11}\text{H}_{13}\text{N}_2\text{O}_3$   $[\text{M}+\text{H}]^+$  221.0926, found 221.0930.

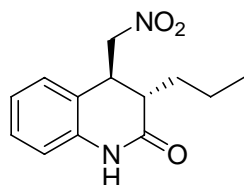

**Compound (6c)**, yield: 15.6 mg, 63 %; 98 % ee; > 99:1 dr; yellow oil; The enantiomeric excess was determined by HPLC on Daicel Chiralpak AD-H with hexane/i-PrOH (98:2) as the eluent, Flow: 1.0 mL/min; UV = 252 nm;  $t_{\text{minor}} = 75.746$  min,  $t_{\text{major}} = 66.776$  min;  $^1\text{H}$  NMR (500 MHz,  $\text{CDCl}_3$ ):  $\delta = 8.37$  (s, 1H), 7.29–7.26 (m, 1H), 7.20–7.19 (m, 1H), 7.07–7.04 (m, 1H), 6.84–6.83 (m, 1H), 4.51–4.41 (m, 2H), 3.70–3.68 (m, 1H), 2.60–2.58 (m, 1H), 1.60–1.56 (m, 2H), 1.45–1.40 (m, 2H), 0.93–0.83 (m, 3H) ppm;  $^{13}\text{C}$  NMR (125 MHz,  $\text{CDCl}_3$ ):  $\delta = 171.9, 135.9, 129.5, 129.4, 124.1, 119.8, 115.9, 78.1, 43.8, 40.5, 32.4, 20.1, 13.7$  ppm; HRMS: (ESI+)  $m/z$  calcd for  $\text{C}_{13}\text{H}_{17}\text{N}_2\text{O}_3$   $[\text{M}+\text{H}]^+$  249.1239, found 249.1235.

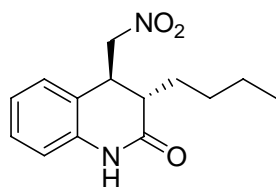

**Compound (6d)**, yield: 20.4 mg, 87 %; > 99 % ee; > 99:1 dr; yellow oil; The enantiomeric excess was determined by HPLC on Daicel Chiralpak OB-H with hexane/i-PrOH (95:5) as the eluent, Flow: 1.0 mL/min; UV = 252 nm;  $t_{\text{major}} = 46.583$  min;  $^1\text{H}$  NMR (500 MHz,  $\text{CDCl}_3$ ):  $\delta = 9.44$  (s, 1H), 7.29–7.26 (m, 1H), 7.20–7.19 (m, 1H), 7.06–7.03 (m, 1H), 6.92–6.90 (m, 1H), 4.52–4.42 (m, 2H), 3.71–3.68 (m, 1H), 2.58–2.55 (m, 1H), 1.63–1.58 (m, 1H), 1.49–1.36 (m, 3H),

1.33–1.24 (m, 3H), 0.88–0.86 (m, 3H) ppm;  $^{13}\text{C}$  NMR (125 MHz,  $\text{CDCl}_3$ ):  $\delta$  = 172.5, 136.0, 129.4 ( $\times 2$ ), 124.1, 119.7, 116.1, 78.1, 43.9, 40.4, 30.1, 29.0, 22.3, 13.8 ppm; HRMS: (ESI+)  $m/z$  calcd for  $\text{C}_{14}\text{H}_{19}\text{N}_2\text{O}_3$   $[\text{M}+\text{H}]^+$  263.1396, found 263.1401.

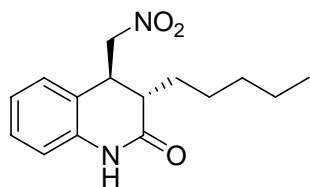

**Compound (6e)**, yield: 20.4 mg, 74 %; > 99 % ee; > 99:1 dr; yellow oil; The enantiomeric excess was determined by HPLC on Daicel Chiralpak OB-H with hexane/i-PrOH (90:10) as the eluent, Flow: 1.0 mL/min; UV = 252 nm;  $t_{\text{minor}}$  = 21.425 min,  $t_{\text{major}}$  = 24.892 min;  $^1\text{H}$  NMR (500 MHz,  $\text{CDCl}_3$ ):  $\delta$  = 9.57 (s, 1H), 7.29–7.26 (m, 1H), 7.20–7.19 (m, 1H), 7.06–7.03 (m, 1H), 6.92–6.91 (m, 1H), 4.52–4.42 (m, 2H), 3.71–3.68 (m, 1H), 2.59–2.56 (m, 1H), 1.64–1.55 (m, 1H), 1.50–1.37 (m, 3H), 1.30–1.26 (m, 4H), 0.87–0.84 (m, 3H) ppm;  $^{13}\text{C}$  NMR (125 MHz,  $\text{CDCl}_3$ ):  $\delta$  = 172.6, 156.0, 136.0, 129.4, 129.3, 124.1, 119.7, 116.1, 78.1, 43.9, 40.4, 31.3, 30.3, 26.5, 22.3, 13.9 ppm; HRMS: (ESI+)  $m/z$  calcd for  $\text{C}_{15}\text{H}_{21}\text{N}_2\text{O}_3$   $[\text{M}+\text{H}]^+$  277.1552, found 277.1549.

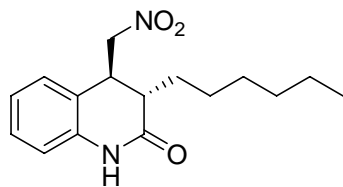

**Compound (6f)**, yield: 22.0 mg, 76 %; 98 % ee; > 99:1 dr; yellow oil; The enantiomeric excess was determined by HPLC on Daicel Chiralpak OB-H with hexane/i-PrOH (90:10) as the eluent, Flow: 1.0 mL/min; UV = 252 nm;  $t_{\text{minor}}$  = 75.746 min,  $t_{\text{major}}$  = 66.776 min;  $^1\text{H}$  NMR (500 MHz,  $\text{CDCl}_3$ ):  $\delta$  = 9.30 (s, 1H), 7.29–7.26 (m, 1H), 7.20–7.19 (m, 1H), 7.06–7.03 (m, 1H), 6.90–6.89 (m, 1H), 4.51–4.41 (m, 2H), 3.71–3.68 (m, 1H), 2.58–2.55 (m, 1H), 1.64–1.57 (m, 1H), 1.49–1.34 (m, 3H), 1.29–1.22 (m, 6H), 0.86–0.84 (m, 3H) ppm;  $^{13}\text{C}$  NMR (125 MHz,  $\text{CDCl}_3$ ):  $\delta$  = 172.4, 135.9, 129.4 ( $\times 2$ ), 124.1, 119.7, 116.0, 78.1, 44.0, 40.4, 31.5, 30.3, 28.8, 26.8, 22.5, 14.0 ppm; HRMS: (ESI+)  $m/z$  calcd for  $\text{C}_{16}\text{H}_{23}\text{N}_2\text{O}_3$   $[\text{M}+\text{H}]^+$  291.1709, found 291.1709.

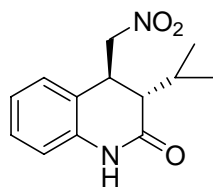

**Compound (6g)**, yield: 19.1 mg, 77 %; 95 % ee; > 30:1 dr; yellow oil; The enantiomeric excess was determined by HPLC on Daicel Chiralpak AD-H with hexane/i-PrOH (98:2) as the eluent, Flow: 1.0 mL/min; UV = 252 nm;  $t_{\text{minor}}$  = 63.017 min,  $t_{\text{major}}$  = 52.155 min;  $^1\text{H}$  NMR (500 MHz,  $\text{CDCl}_3$ ):  $\delta$  = 8.81 (s, 1H), 7.28–7.25 (m, 1H), 7.20–7.19 (m, 1H), 7.06–7.03 (m, 1H), 6.86–6.85 (m, 1H), 4.51–4.42 (m, 2H), 3.87–3.84 (m, 1H), 2.25–2.23 (m, 1H), 1.79–1.71 (m, 1H), 1.03–0.98 (m, 6H) ppm;  $^{13}\text{C}$  NMR (125 MHz,  $\text{CDCl}_3$ ):  $\delta$  = 171.2, 136.1, 129.4, 129.1, 124.1, 120.4, 115.9, 78.2, 50.8, 39.0, 28.3, 20.8, 20.5 ppm; HRMS: (ESI+)  $m/z$  calcd for  $\text{C}_{13}\text{H}_{17}\text{N}_2\text{O}_3$   $[\text{M}+\text{H}]^+$  249.1239, found 249.1247.

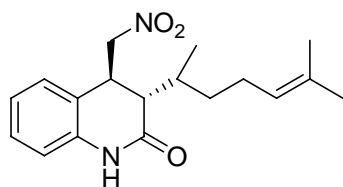

**Compound (6h)**, yield: 23.1 mg, 73 %; > 99 % ee; > 99:1 dr; yellow oil; The enantiomeric excess was determined by HPLC on Daicel Chiralpak OB-H with hexane/i-PrOH (95:5) as the eluent, Flow: 1.0 mL/min; UV = 252 nm;  $t_{\text{major}}$  = 33.481 min;  $^1\text{H}$  NMR (500 MHz,  $\text{CDCl}_3$ ):  $\delta$  = 8.47 (s, 1H), 7.28–7.26 (m, 1H), 7.19–7.17 (m, 1H), 7.05–7.02 (m, 1H), 6.83–6.81 (m, 1H), 5.01–4.98 (m, 1H), 5.50–4.41 (m, 2H), 3.86–3.62 (m, 1H), 2.39–2.36 (m, 1H), 2.08–2.01 (m, 1H), 1.86–1.81 (m, 1H), 1.73–1.67 (m, 1H), 1.62 (s, 3H), 1.54 (s, 3H), 1.52–1.48 (m, 1H), 1.35–1.28 (m, 1H), 0.91–0.88 (m, 3H) ppm;  $^{13}\text{C}$  NMR (125 MHz,  $\text{CDCl}_3$ ):  $\delta$  = 171.2, 136.0, 131.9, 129.4, 128.9, 124.1, 123.8, 120.6, 115.8, 78.5, 49.3, 38.4, 34.3, 33.3, 25.6, 25.2, 17.6, 16.6 ppm; HRMS: (ESI+)  $m/z$  calcd for  $\text{C}_{18}\text{H}_{25}\text{N}_2\text{O}_3$   $[\text{M}+\text{H}]^+$  317.1865, found 317.1849.

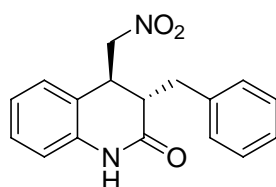

**Compound (6i)**, yield: 22.2 mg, 75 %; 95 % ee; > 99:1 dr; yellow oil; The enantiomeric excess was determined by HPLC on Daicel Chiralpak OB-H with hexane/i-PrOH (95:5) as the eluent, Flow: 1.0 mL/min; UV = 252 nm;

$t_{\text{minor}} = 133.223$  min,  $t_{\text{major}} = 167.151$  min;  $^1\text{H}$  NMR (500 MHz,  $\text{CDCl}_3$ ):  $\delta = 9.02$  (s, 1H), 7.34–7.30 (m, 3H), 7.29–7.26 (m, 1H), 7.16–7.15 (m, 1H), 7.11–7.08 (m, 3H), 6.92–7.90 (m, 1H), 4.43–4.36 (m, 2H), 3.53–3.49 (m, 1H), 3.11–3.07 (m, 1H), 2.89–2.85 (m, 1H), 2.58–2.53 (m, 1H) ppm;  $^{13}\text{C}$  NMR (125 MHz,  $\text{CDCl}_3$ ):  $\delta = 171.5$ , 136.8, 136.0, 129.7, 129.6, 129.0 ( $\times 2$ ), 128.9 ( $\times 2$ ), 127.2, 124.4, 119.4, 116.2, 77.8, 45.7, 38.6, 35.8 ppm; HRMS: (ESI+)  $m/z$  calcd for  $\text{C}_{17}\text{H}_{17}\text{N}_2\text{O}_3$   $[\text{M}+\text{H}]^+$  297.1239, found 297.1243.

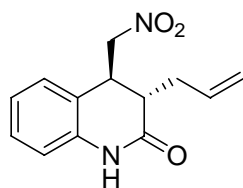

**Compound (6j)**, yield: 18.0 mg, 73 %; 98 % ee; > 99:1 dr; yellow oil; The enantiomeric excess was determined by HPLC on Daicel Chiralpak AD-H with hexane/i-PrOH (95:5) as the eluent, Flow: 1.0 mL/min; UV = 252 nm;  $t_{\text{minor}} = 26.985$  min,  $t_{\text{major}} = 24.238$  min;  $^1\text{H}$  NMR (500 MHz,  $\text{CDCl}_3$ ):  $\delta = 9.68$  (s, 1H), 7.30–7.27 (m, 1H), 7.19–7.17 (m, 1H), 7.08–7.05 (m, 1H), 6.95–6.93 (m, 1H), 5.81–5.72 (m, 1H), 5.15–5.13 (m, 1H), 5.03–5.00 (m, 1H), 4.52–4.43 (m, 2H), 3.77–3.74 (m, 1H), 2.68–2.65 (m, 1H), 2.48–2.43 (m, 1H), 2.16–2.10 (m, 1H) ppm;  $^{13}\text{C}$  NMR (125 MHz,  $\text{CDCl}_3$ ):  $\delta = 172.0$ , 135.9, 133.6, 129.5, 129.4, 124.3, 119.3, 118.8, 77.9, 43.4, 39.2, 34.3 ppm; HRMS: (ESI+)  $m/z$  calcd for  $\text{C}_{13}\text{H}_{15}\text{N}_2\text{O}_3$   $[\text{M}+\text{H}]^+$  247.1083, found 247.1079.

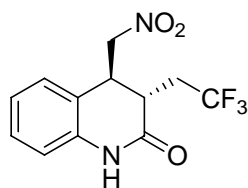

**Compound (6k)**, yield: 20.2 mg, 70 %; 92 % ee; > 99:1 dr; yellow oil; The enantiomeric excess was determined by HPLC on Daicel Chiralpak AS-H with hexane/i-PrOH (90:10) as the eluent, Flow: 1.0 mL/min; UV = 252nm;  $t_{\text{minor}} = 40.799$  min,  $t_{\text{major}} = 52.021$  min;  $^1\text{H}$  NMR (500 MHz,  $\text{CDCl}_3$ ):  $\delta = 9.21$  (s, 1H), 7.35–7.32 (m, 1H), 7.26–7.25 (m, 1H), 7.14–7.10 (m, 1H), 6.94–6.92 (m, 1H), 4.57–4.53 (m, 1H), 4.49–4.45 (m, 1H), 3.89–3.86 (m, 1H), 3.03–3.00 (m, 1H), 2.46–2.36 (m, 1H), 2.31–2.20 (m, 1H) ppm;  $^{13}\text{C}$  NMR (125 MHz,  $\text{CDCl}_3$ ):  $\delta = 169.2$ , 135.5, 130.0 (1C, m), 126.8, 124.9, 124.6, 118.5, 116.5, 77.1, 39.1 (d,  $^3J_{\text{C-F}} = 139.6$

Hz), 33.8 (1C, m), 29.7 ppm; HRMS: (ESI+) m/z calcd for C<sub>12</sub>H<sub>12</sub>F<sub>3</sub>N<sub>2</sub>O<sub>3</sub> [M+H]<sup>+</sup> 289.0800, found 289.0806.

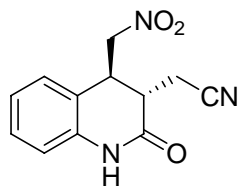

**Compound (6l)**, yield: 16.4 mg, 67 %; > 99 % ee; > 99:1 dr; yellow oil; The enantiomeric excess was determined by HPLC on Daicel Chiralpak AD-H with hexane/i-PrOH (90:10) as the eluent, Flow: 1.0 mL/min; UV = 252 nm;  $t_{\text{major}}$  = 38.653 min; <sup>1</sup>H NMR (500 MHz, CDCl<sub>3</sub>): δ = 9.65 (s, 1H), 7.36–7.27 (m, 2H), 7.15–7.09 (m, 1H), 6.97–6.93 (m, 1H), 4.65–4.61 (m, 1H), 4.56–4.52 (m, 1H), 3.90–3.87 (m, 1H), 3.08–3.04 (m, 1H), 2.78–2.73 (m, 1H), 2.61–2.56 (m, 1H) ppm; <sup>13</sup>C NMR (125 MHz, CDCl<sub>3</sub>): δ = 168.4, 135.2, 130.2, 129.4, 125.1, 117.8, 116.7, 116.1, 76.8, 40.3, 39.6, 18.7 ppm; HRMS: (ESI+) m/z calcd for C<sub>12</sub>H<sub>12</sub>N<sub>3</sub>O<sub>3</sub> [M+H]<sup>+</sup> 246.0879, found 246.0888.

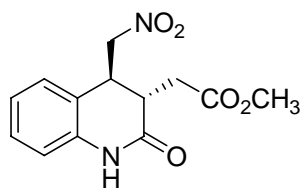

**Compound (6m)**, yield: 18.9 mg, 68 %; > 99 % ee; > 99:1 dr; yellow oil; The enantiomeric excess was determined by HPLC on Daicel Chiralpak AS-H with hexane/i-PrOH (70:30) as the eluent, Flow: 1.0 mL/min; UV = 254 nm;  $t_{\text{major}}$  = 26.057 min; <sup>1</sup>H NMR (500 MHz, CDCl<sub>3</sub>): δ = 9.49 (s, 1H), 7.31–7.28 (m, 1H), 7.22–7.20 (m, 1H), 7.09–7.06 (m, 1H), 6.95–6.94 (m, 1H), 4.61–4.57 (m, 1H), 4.51–4.47 (m, 1H), 3.83–3.80 (m, 1H), 3.70 (s, 3H), 3.14–3.11 (m, 1H), 2.67–2.63 (m, 1H), 2.51–2.45 (m, 1H) ppm; <sup>13</sup>C NMR (125 MHz, CDCl<sub>3</sub>): δ = 170.7, 170.5, 135.7, 129.7, 129.6, 124.4, 118.9, 116.3, 77.8, 52.2, 40.4, 39.9, 34.1 ppm; HRMS: (ESI+) m/z calcd for C<sub>13</sub>H<sub>15</sub>N<sub>2</sub>O<sub>5</sub> [M+H]<sup>+</sup> 279.0980, found 279.0988.

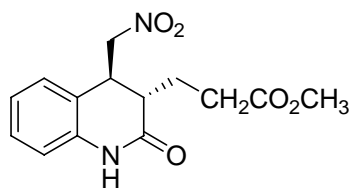

**Compound (6n)**, yield: 19.3 mg, 66 %; > 99 % ee; > 99:1 dr; yellow oil; The enantiomeric excess was determined by HPLC on Daicel Chiralpak OD-H with hexane/i-PrOH (95:5) as the eluent, Flow: 1.0 mL/min; UV =



252 nm;  $t_{\text{major}} = 91.434$  min;  $^1\text{H}$  NMR (500 MHz,  $\text{CDCl}_3$ ):  $\delta = 9.22$  (s, 1H), 7.30–7.27 (m, 1H), 7.21–7.20 (m, 1H), 7.08–7.05 (m, 1H), 6.90–6.88 (m, 1H), 4.53–4.49 (m, 1H), 4.46–4.42 (m, 1H), 3.70–3.65 (m, 1H), 3.66 (s, 3H), 3.66–3.62 (m, 1H), 2.57–2.45 (m, 2H), 1.93–1.81 (m, 2H) ppm;  $^{13}\text{C}$  NMR (125 MHz,  $\text{CDCl}_3$ ):  $\delta = 172.8$ , 171.2, 135.6, 129.6, 129.5, 124.3, 119.4, 116.2, 77.8, 51.8, 43.2, 41.0, 31.2, 25.7 ppm; HRMS: (ESI+)  $m/z$  calcd for  $\text{C}_{14}\text{H}_{17}\text{N}_2\text{O}_5$   $[\text{M}+\text{H}]^+$  293.1137, found 293.1145.

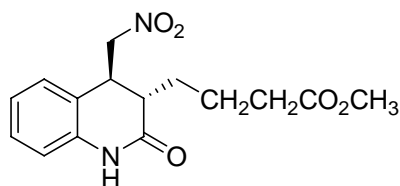

**Compound (6o)**, yield: 21.4 mg, 70 %; 96 % ee; > 99:1 dr; yellow oil; The enantiomeric excess was determined by HPLC on Daicel Chiralpak AS-H with hexane/ethanol (80:20) as the eluent, Flow: 1.0 mL/min; UV = 252 nm;  $t_{\text{minor}} = 15.732$  min,  $t_{\text{major}} = 19.345$  min;  $^1\text{H}$  NMR (500 MHz,  $\text{CDCl}_3$ ):  $\delta = 9.70$  (s, 1H), 7.29–7.26 (m, 1H), 7.21–7.19 (m, 1H), 7.06–7.03 (m, 1H), 6.93–6.92 (m, 1H), 4.54–4.49 (m, 1H), 4.47–4.43 (m, 1H), 3.72–3.68 (m, 1H), 3.63 (s, 3H), 2.61–2.58 (m, 1H), 2.37–2.27 (m, 2H), 1.88–1.71 (m, 2H), 1.66–1.59 (m, 1H), 1.55–1.48 (m, 1H) ppm;  $^{13}\text{C}$  NMR (125 MHz,  $\text{CDCl}_3$ ):  $\delta = 173.4$ , 172.0, 135.7, 129.5, 129.4, 124.1, 119.5, 116.2, 77.9, 51.6, 43.6, 40.4, 33.4, 29.7, 22.2 ppm; HRMS: (ESI+)  $m/z$  calcd for  $\text{C}_{15}\text{H}_{19}\text{N}_2\text{O}_5$   $[\text{M}+\text{H}]^+$  307.1294, found 307.1292.

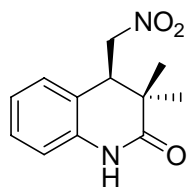

**Compound (6p)**, yield: 11.7 mg, 50 %; > 99 % ee; > 99:1 dr; yellow oil; The enantiomeric excess was determined by HPLC on Daicel Chiralpak OB-H with hexane/i-PrOH (90:10) as the eluent, Flow: 1.0 mL/min; UV = 252 nm;  $t_{\text{major}} = 51.768$  min;  $^1\text{H}$  NMR (500 MHz,  $\text{CDCl}_3$ ):  $\delta = 8.97$  (s, 1H), 7.28–7.25 (m, 1H), 7.11–7.09 (m, 1H), 7.03–7.00 (m, 1H), 6.89–6.88 (m, 1H), 4.73–4.69 (m, 1H), 4.37–4.32 (m, 1H), 3.49–3.46 (m, 1H), 1.36 (s, 3H), 1.21 (s, 3H) ppm;  $^{13}\text{C}$  NMR (125 MHz,  $\text{CDCl}_3$ ):  $\delta = 174.8$ , 135.7, 129.2, 129.0, 123.9, 121.8, 115.6, 76.8, 47.2, 39.8, 25.4, 20.8 ppm; HRMS: (ESI+)  $m/z$  calcd for  $\text{C}_{12}\text{H}_{15}\text{N}_2\text{O}_3$   $[\text{M}+\text{H}]^+$  235.1083, found 235.1077.

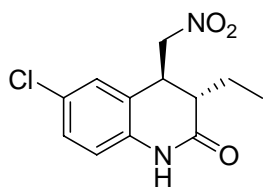

**Compound (6q)**, yield: 20.1 mg, 75 %; > 99 % ee; > 99:1 dr; yellow oil; The enantiomeric excess was determined by HPLC on Daicel Chiralpak AS-H with hexane/EtOH (80:20) as the eluent, Flow: 1.0 mL/min; UV = 216 nm;  $t_{\text{major}} = 19.025$  min;  $^1\text{H}$  NMR (500 MHz,  $\text{CDCl}_3$ ):  $\delta = 9.56$  (s, 1H), 7.27–7.21 (m, 2H), 6.89–6.88 (m, 1H), 4.51–4.42 (m, 2H), 3.70–3.67 (m, 1H), 2.49–2.46 (m, 1H), 1.70–1.56 (m, 1H), 1.53–1.44 (m, 1H), 1.04–1.02 (m, 3H) ppm;  $^{13}\text{C}$  NMR (125 MHz,  $\text{CDCl}_3$ ):  $\delta = 172.0, 134.6, 129.5, 129.3, 129.0, 121.4, 117.4, 77.6, 45.2, 39.9, 23.7, 11.5$  ppm; HRMS: (ESI+)  $m/z$  calcd for  $\text{C}_{12}\text{H}_{14}\text{ClN}_2\text{O}_3$   $[\text{M}+\text{H}]^+$  269.0692, found 269.0687.

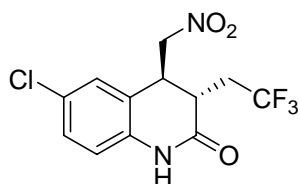

**Compound (6r)**, yield: 24.5 mg, 76 %; > 99 % ee; > 99:1 dr; yellow oil; The enantiomeric excess was determined by HPLC on Daicel Chiralpak AS-H with hexane/EtOH (80:20) as the eluent, Flow: 1.0 mL/min; UV = 216 nm;  $t_{\text{minor}} = 10.106$  min,  $t_{\text{major}} = 11.612$  min;  $^1\text{H}$  NMR (500 MHz, DMSO):  $\delta = 10.65$  (s, 1H), 7.36–7.2 (m, 2H), 6.96–6.94 (m, 1H), 4.88–4.86 (m, 1H), 4.67–4.63 (m, 1H), 3.78–3.75 (m, 1H), 2.84–2.82 (m, 1H), 2.58–2.47 (m, 1H), 2.42–2.33 (m, 1H) ppm;  $^{13}\text{C}$  NMR (125 MHz, DMSO):  $\delta = 167.5, 135.9, 129.1, 129.0, 126.3, 126.3$  (d,  $^1J_{\text{C-F}} = 275.4$  Hz), 121.0, 117.4, 77.0, 39.2, 37.1, 33.3 (1C, m) ppm; HRMS: (ESI+)  $m/z$  calcd for  $\text{C}_{12}\text{H}_{11}\text{ClF}_3\text{N}_2\text{O}_3$   $[\text{M}+\text{H}]^+$  323.0410, found 323.0413.

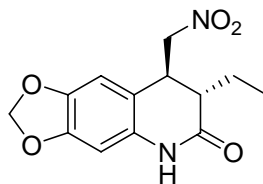

**Compound (6s)**, yield: 18.4 mg, 66 %; 97 % ee; > 99:1 dr; yellow oil; The enantiomeric excess was determined by HPLC on Daicel Chiralpak AS-H with hexane/EtOH (80:20) as the eluent, Flow: 1.0 mL/min; UV = 216 nm;  $t_{\text{minor}} = 17.279$  min,  $t_{\text{major}} = 26.131$  min;  $^1\text{H}$  NMR (500 MHz, DMSO):  $\delta = 10.04$  (s, 1H), 6.79 (s, 1H), 6.49 (s, 1H), 5.96 (s, 2H), 4.65–4.61 (m, 1H), 4.53–4.49 (m, 1H),

3.51 (t,  $J = 7.5$  Hz, 1H), 2.22 (t,  $J = 7.5$  Hz, 1H), 1.44–1.30 (m, 2H), 0.89 (t,  $J = 7.5$  Hz, 3H) ppm;  $^{13}\text{C}$  NMR (125 MHz, DMSO):  $\delta = 169.9, 147.2, 142.4, 131.5, 111.8, 109.1, 101.2, 97.2, 78.2, 44.5, 39.4, 23.1, 11.3$  ppm; HRMS: (ESI+)  $m/z$  calcd for  $\text{C}_{13}\text{H}_{15}\text{N}_2\text{O}_5$   $[\text{M}+\text{H}]^+$  279.0980, found 279.0985.

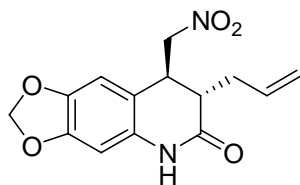

**Compound (6t)**, yield: 22.6 mg, 78 %; 97 % ee; > 99:1 dr; yellow oil; The enantiomeric excess was determined by HPLC on Daicel Chiralpak AS-H with hexane/EtOH (80:20) as the eluent, Flow: 1.0 mL/min; UV = 216 nm;  $t_{\text{minor}} = 19.225$  min,  $t_{\text{major}} = 27.705$  min;  $^1\text{H}$  NMR (500 MHz, DMSO):  $\delta = 10.12$  (s, 1H), 6.75 (s, 1H), 6.52 (s, 1H), 5.98 (d,  $J = 3$  Hz, 2H), 5.78–5.70 (m, 1H), 5.07–4.97 (m, 2H), 4.68–4.64 (m, 1H), 4.55–4.51 (m, 1H), 3.50–3.47 (m, 1H), 2.45–2.42 (m, 1H), 2.23–2.18 (m, 1H), 2.06–2.00 (m, 1H) ppm;  $^{13}\text{C}$  NMR (125 MHz, DMSO):  $\delta = 169.4, 117.4, 112.6, 131.7, 131.6, 117.7, 111.4, 109.0, 101.2, 97.3, 78.1, 42.2, 38.9, 34.08$  ppm; HRMS: (ESI+)  $m/z$  calcd for  $\text{C}_{14}\text{H}_{15}\text{N}_2\text{O}_5$   $[\text{M}+\text{H}]^+$  291.0980, found 291.0985.

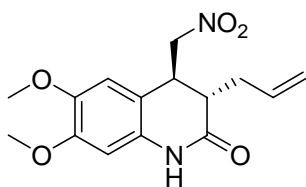

**Compound (6u)**, yield: 22.0 mg, 72 %; > 99 % ee; > 99:1 dr; yellow oil; The enantiomeric excess was determined by HPLC on Daicel Chiralpak AS-H with hexane/EtOH (50:50) as the eluent, Flow: 0.5 mL/min; UV = 216 nm;  $t_{\text{minor}} = 38.491$  min,  $t_{\text{major}} = 44.023$  min;  $^1\text{H}$  NMR (500 MHz,  $\text{CDCl}_3$ ):  $\delta = 9.31$  (s, 1H), 6.66 (s, 1H), 6.45 (s, 1H), 5.80–5.72 (m, 1H), 5.15–5.13 (m, 1H), 5.04–5.01 (m, 1H), 4.49–4.42 (m, 2H), 3.89 (s, 3H), 3.85 (s, 3H), 3.66–3.63 (m, 1H), 2.63–2.60 (m, 1H), 2.47–2.42 (m, 1H), 2.17–2.10 (m, 1H) ppm;  $^{13}\text{C}$  NMR (125 MHz,  $\text{CDCl}_3$ ):  $\delta = 171.5, 149.9, 145.7, 133.7, 129.6, 118.7, 112.2, 110.3, 100.6, 78.0, 56.4, 56.2, 43.5, 39.1, 34.2$  ppm; HRMS: (ESI+)  $m/z$  calcd for  $\text{C}_{15}\text{H}_{19}\text{N}_2\text{O}_5$   $[\text{M}+\text{H}]^+$  307.1293, found 307.1289.

### 3. Typical procedure for one-pot synthesis of **6a**

Solvent (1 mL) was added to a mixture of nitroolefins **1** (0.2 mmol) with aldehydes **2** (0.6 mmol) in the presence of 20 mol% catalyst **3d** and 20 mol% PhCO<sub>2</sub>H **4a** at room temperature under vigorous stirring. After 1 day, the reaction was quenched by adding aq. HCl, extracted with DCM (3 × 5 mL), washed with aq. Na<sub>2</sub>CO<sub>3</sub>, and concentrated. DCM (8 mL) and a mixture of PCC (8 equiv.) with CH<sub>3</sub>CO<sub>2</sub>Na (8 equiv.) were added to the residue at room temperature under vigorous stirring. After reaction completion, the residue was purified by flash chromatography on silica gel (ethyl ether/petroleum ether = 1:2 as eluent) to yield product **6a**. Enantiomeric ratio was determined by HPLC analysis on a Daicel Chiralpak AD-H.

## 4. NMR spectra

### Compound 6a

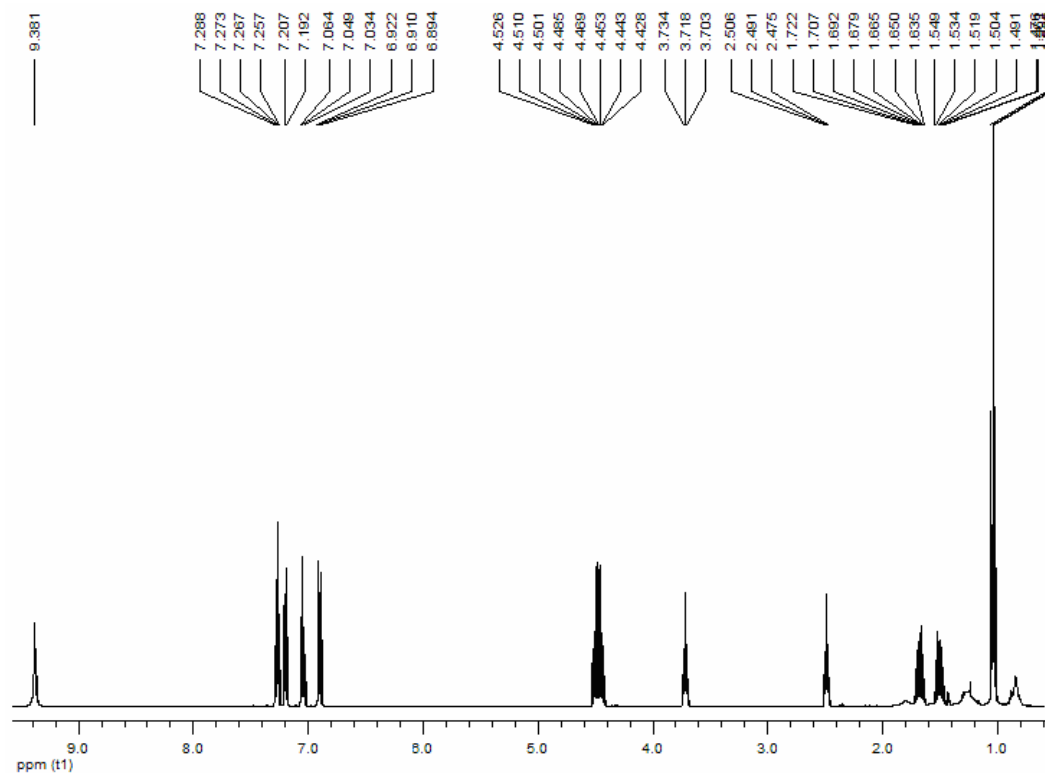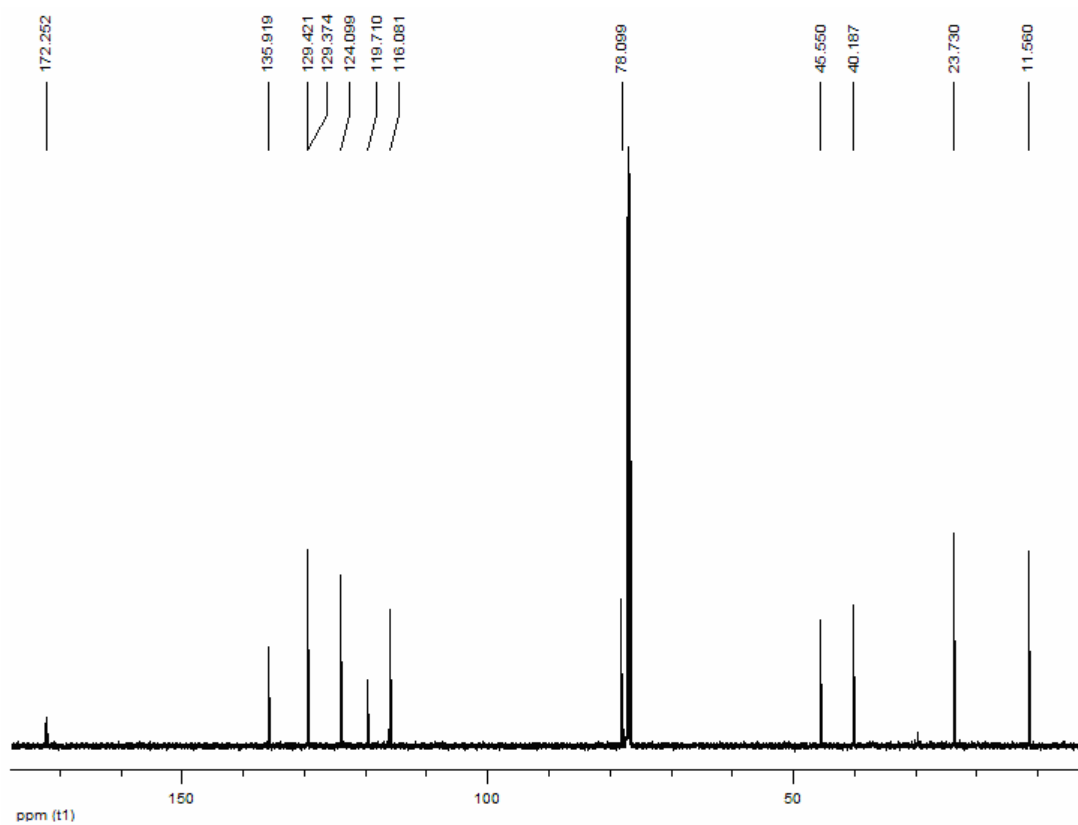

# Compound 6b

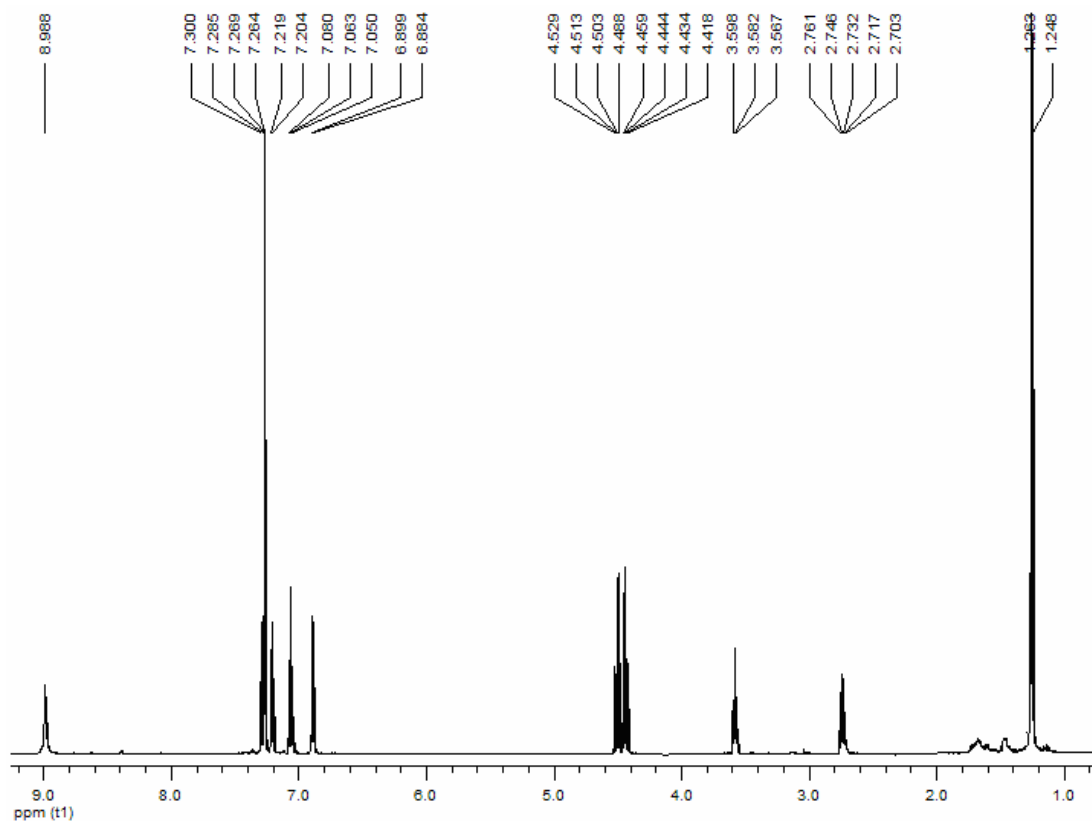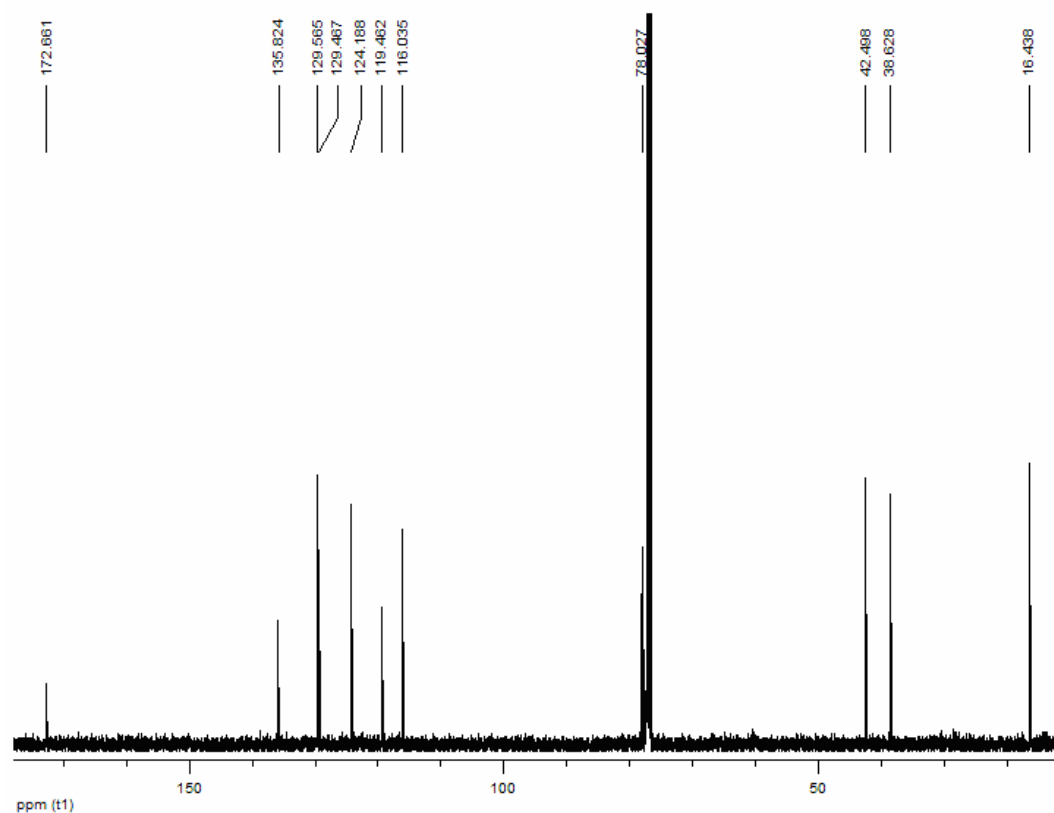

# Compound 6c

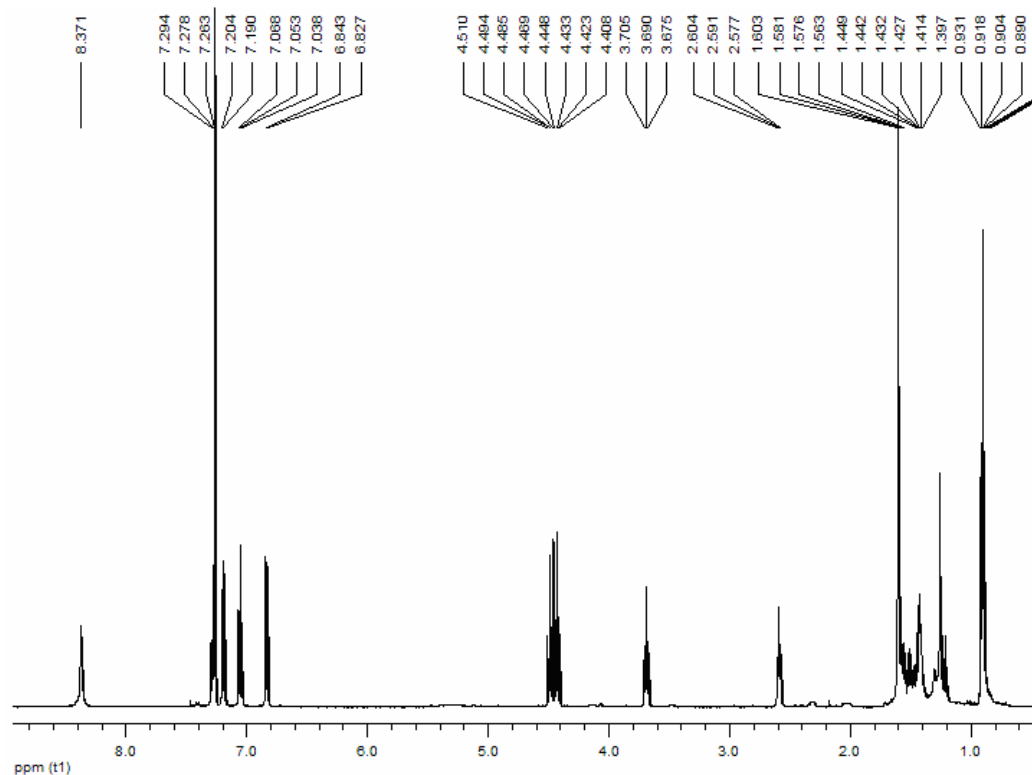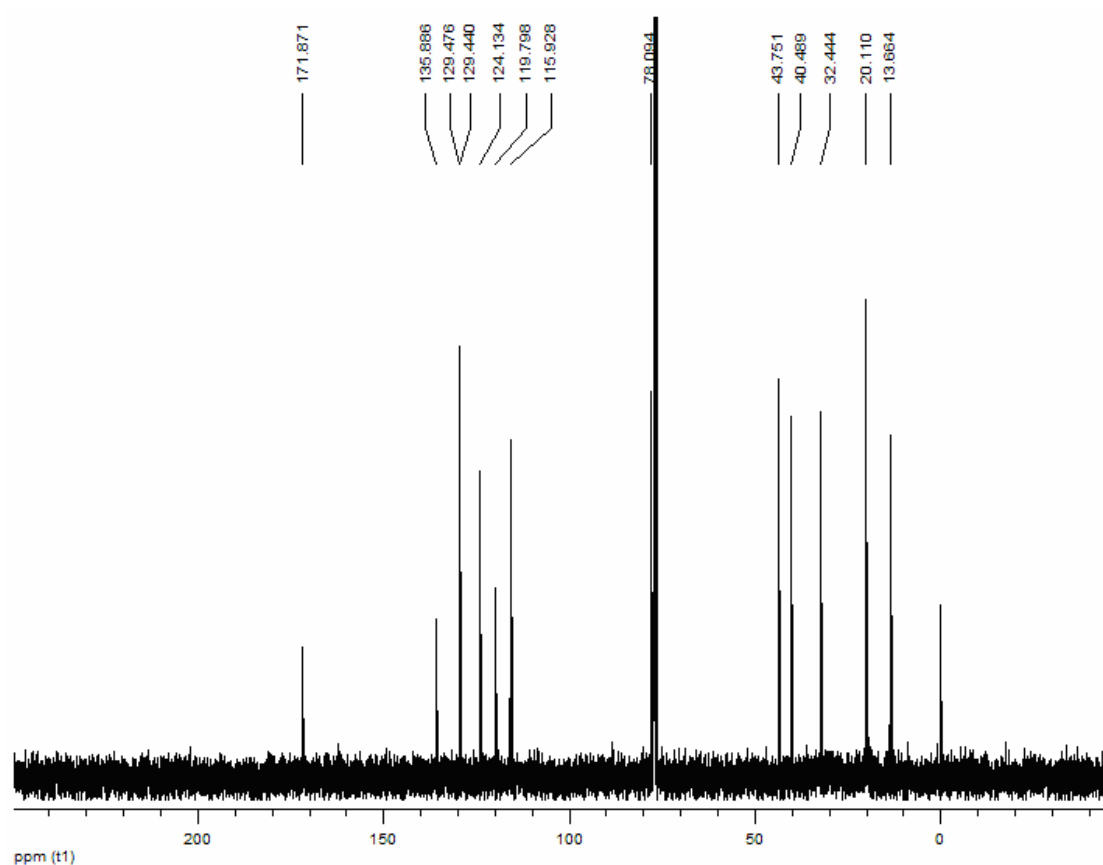

# Compound 6d

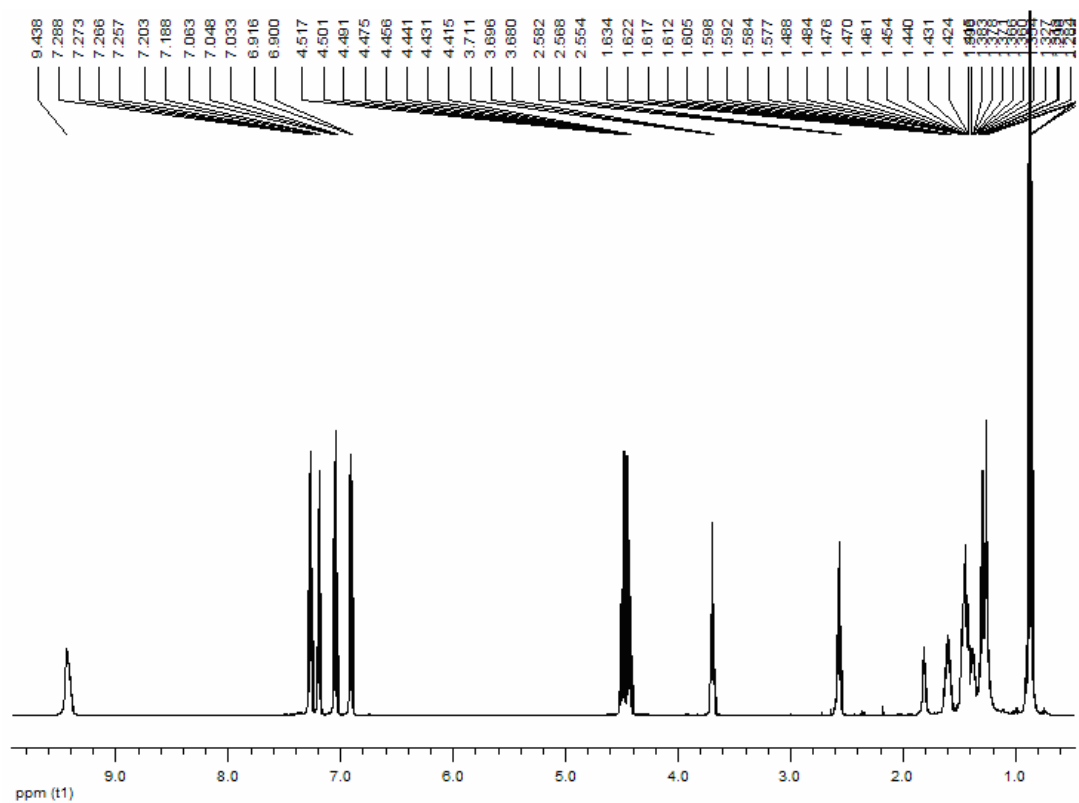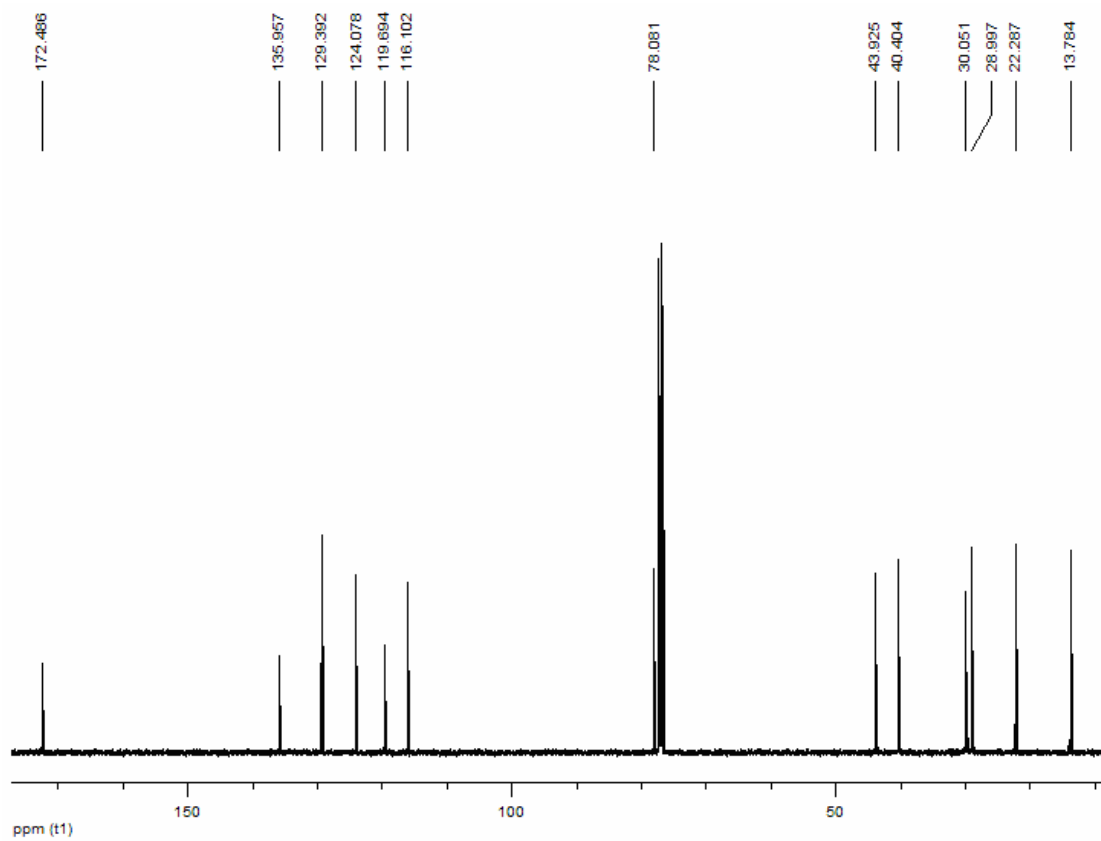



# Compound 6e

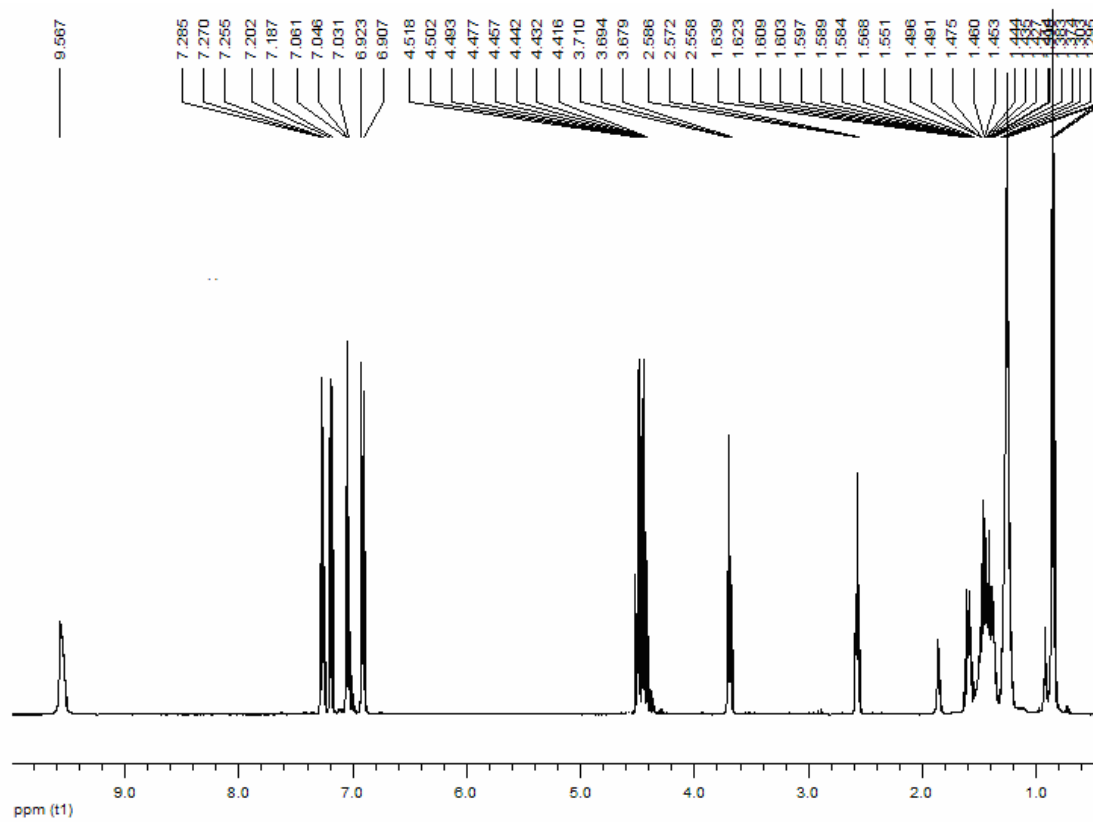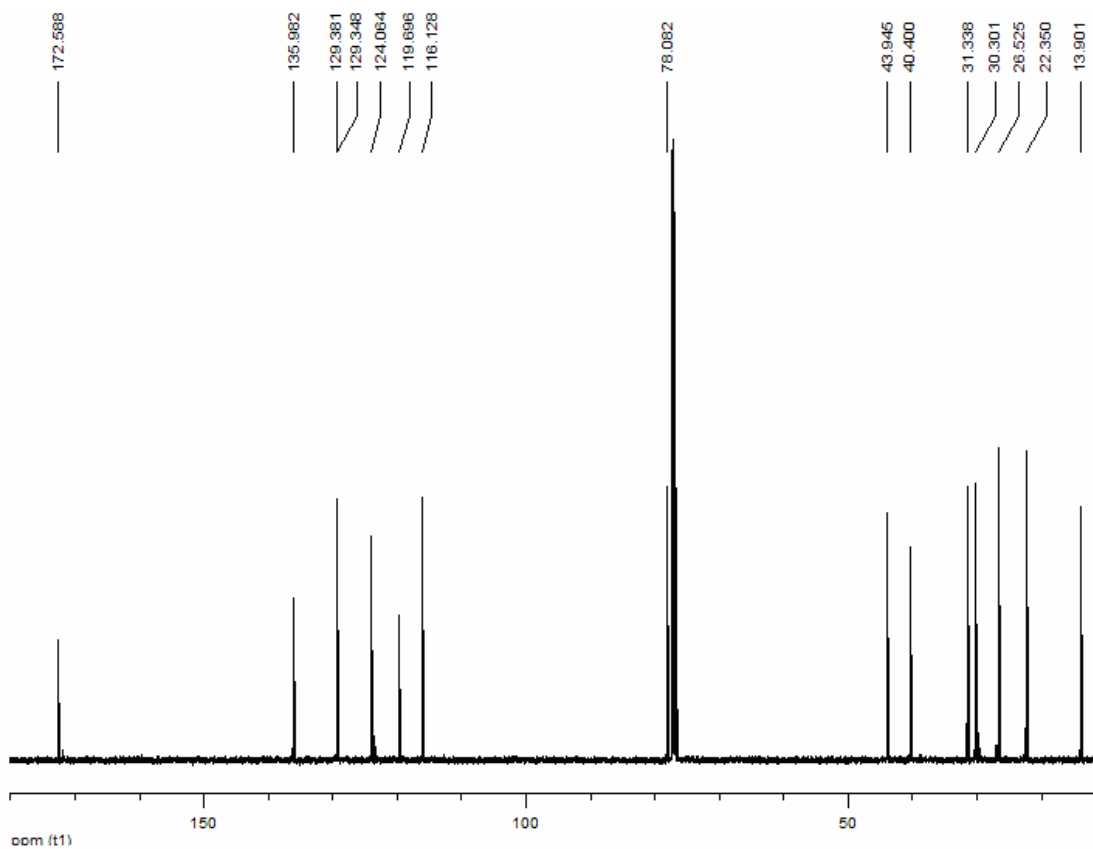

# Compound 6f

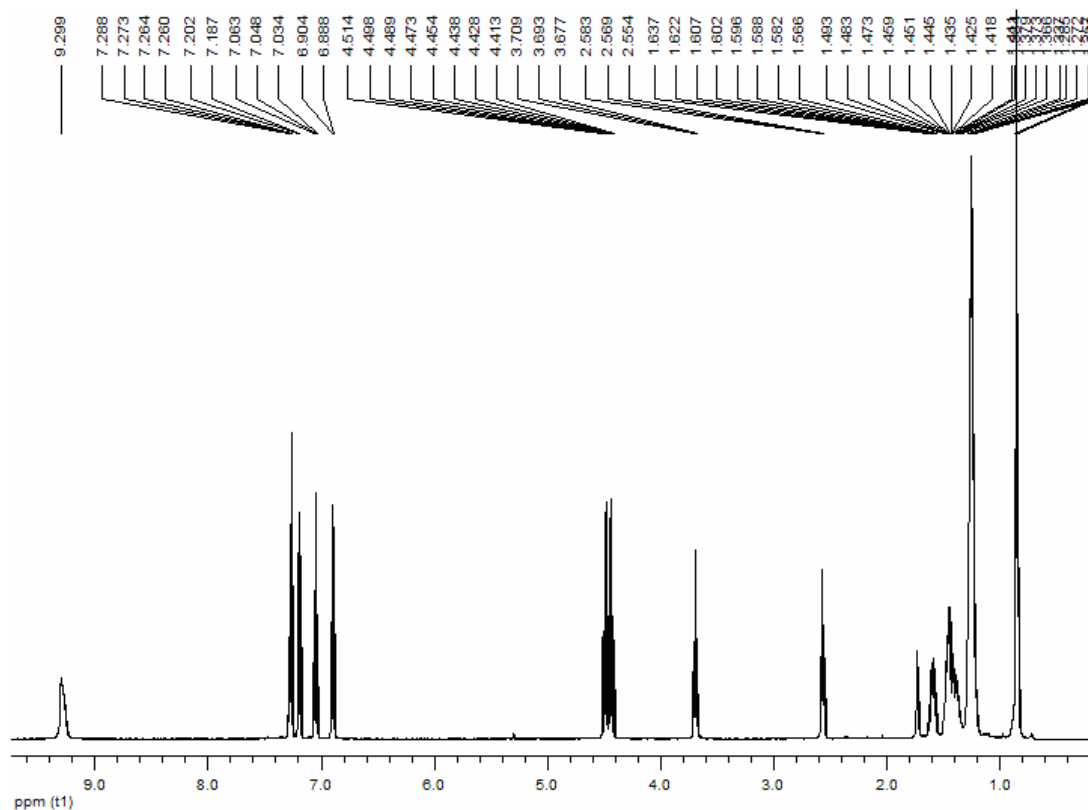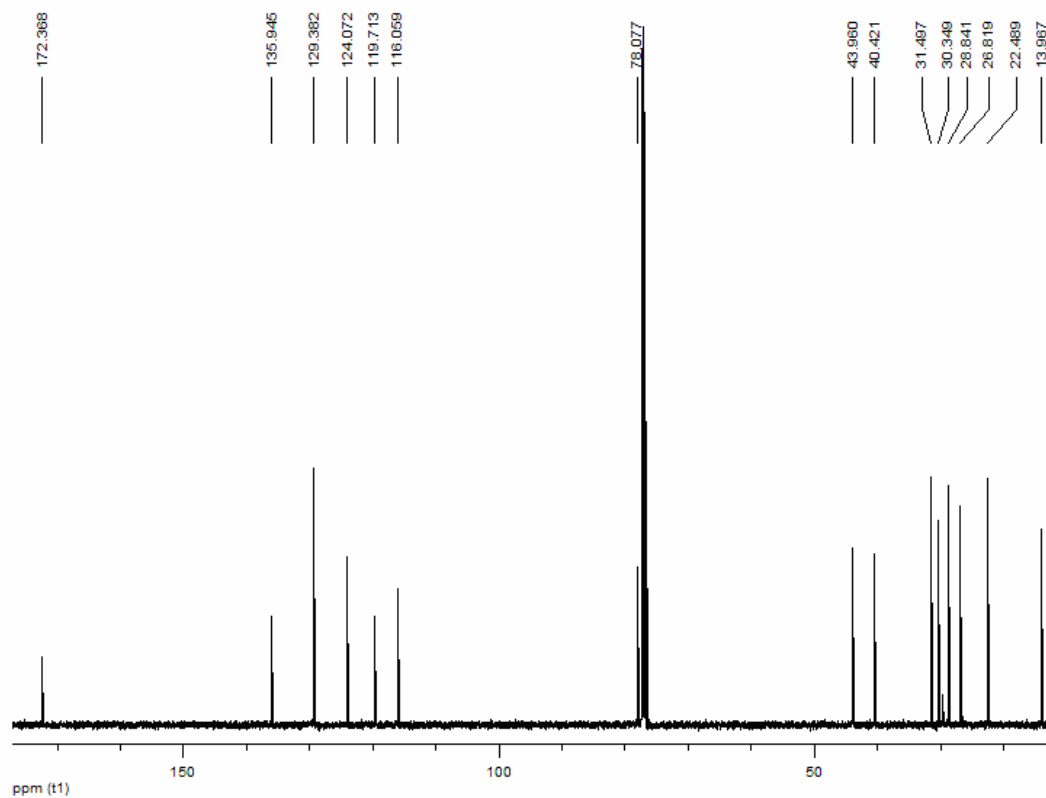

# Compound 6g

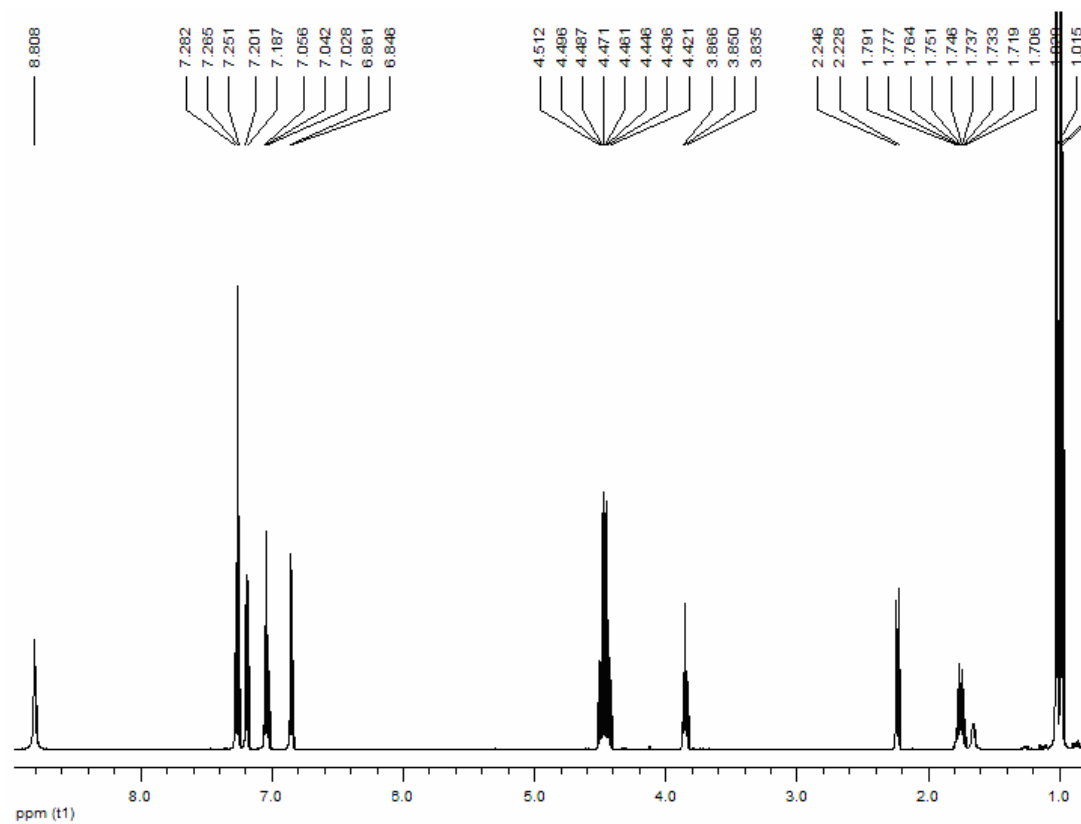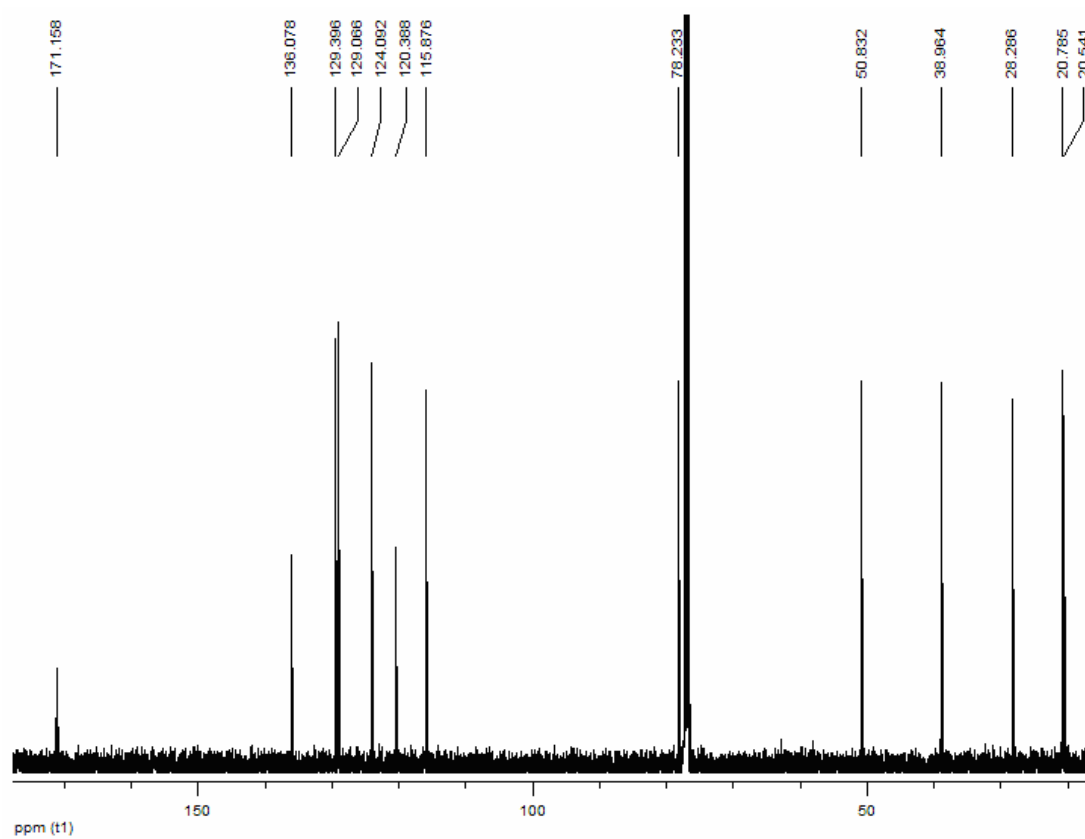

# Compound 6h

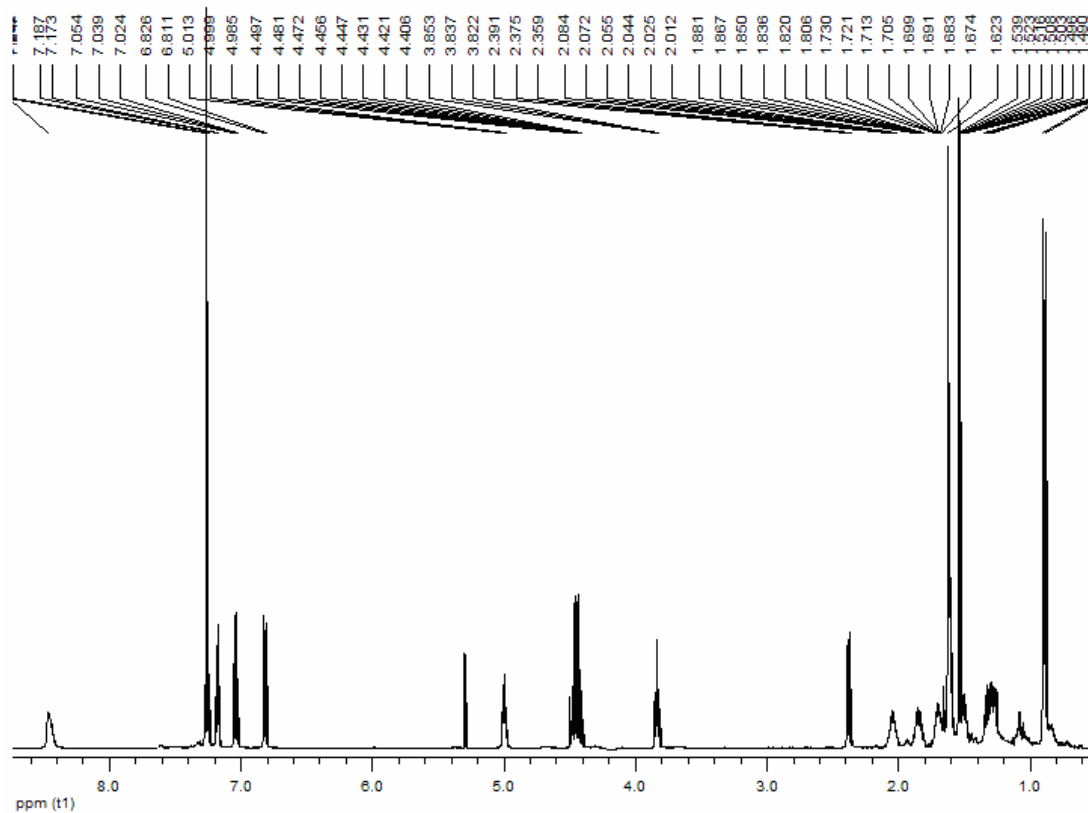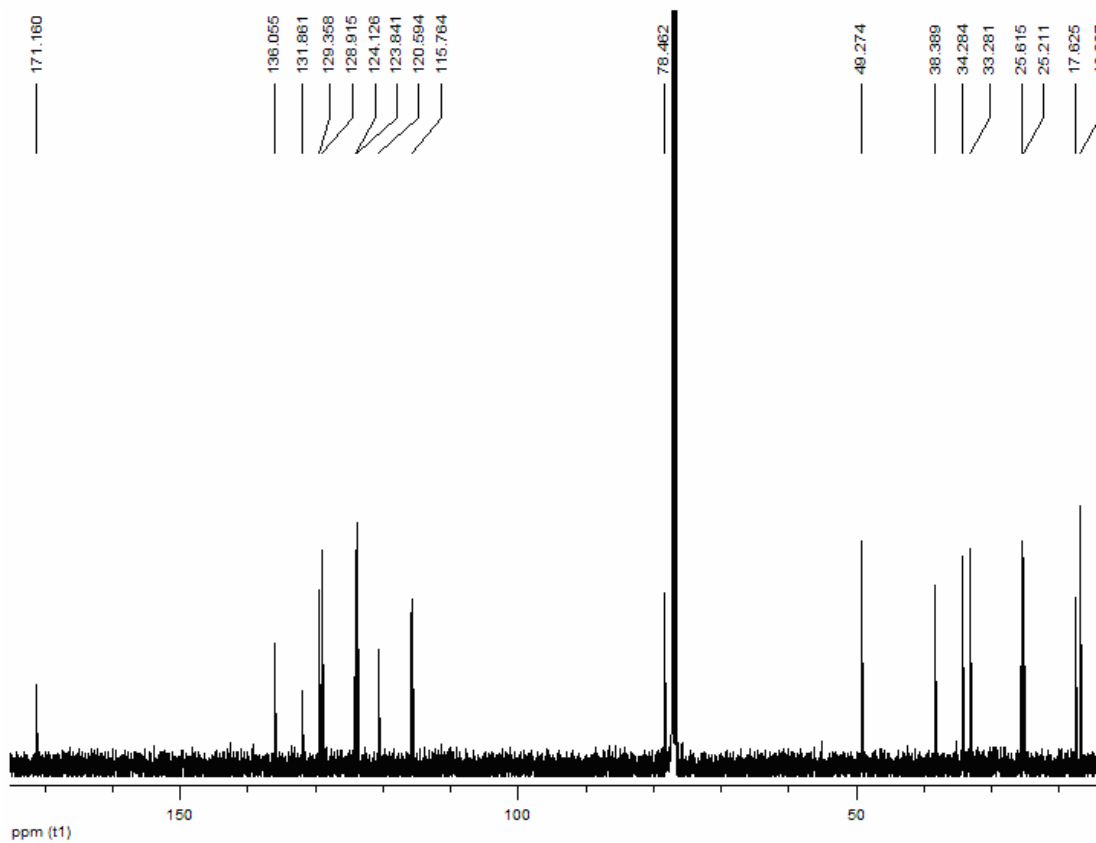

# Compound 6i

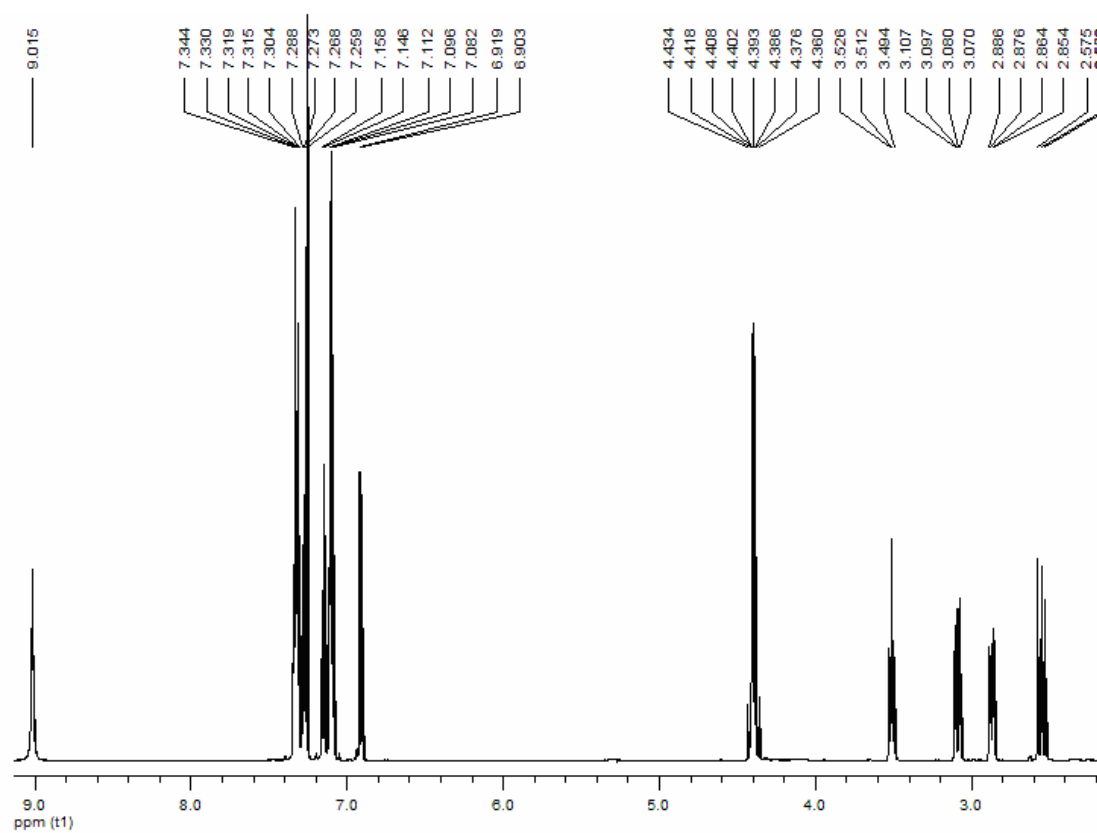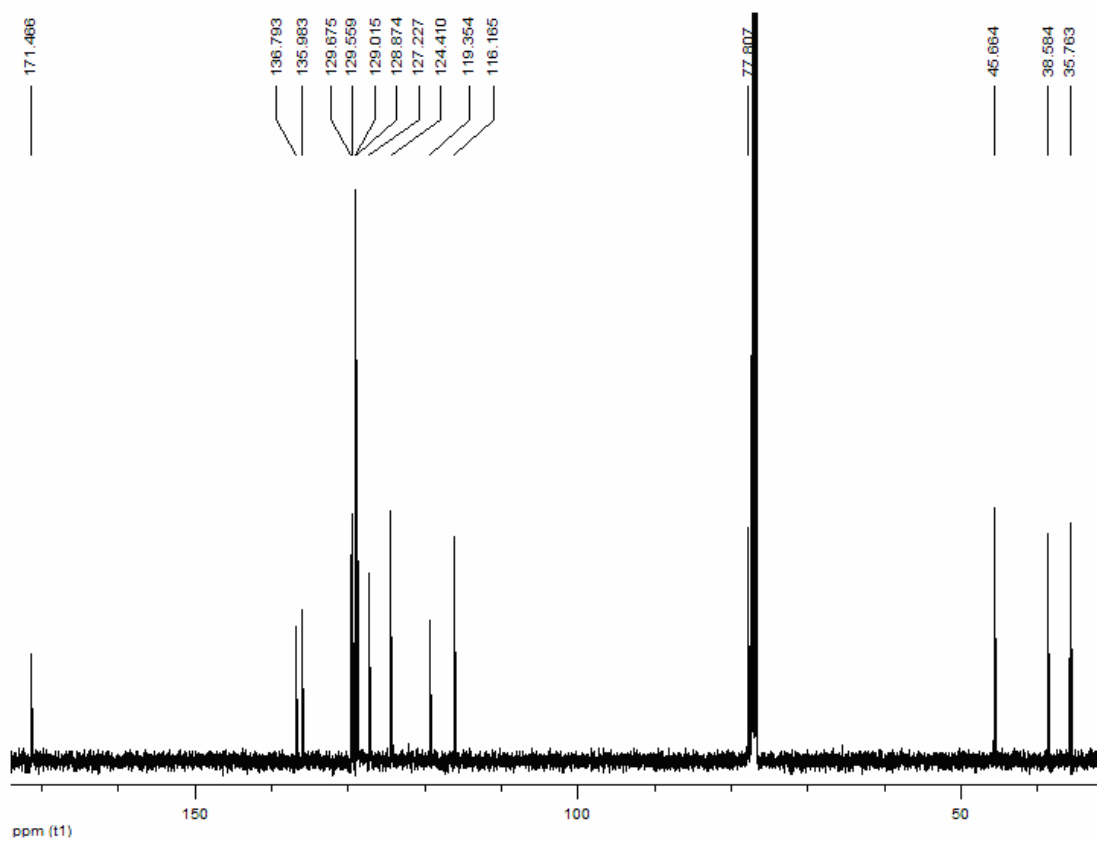

# Compound 6j

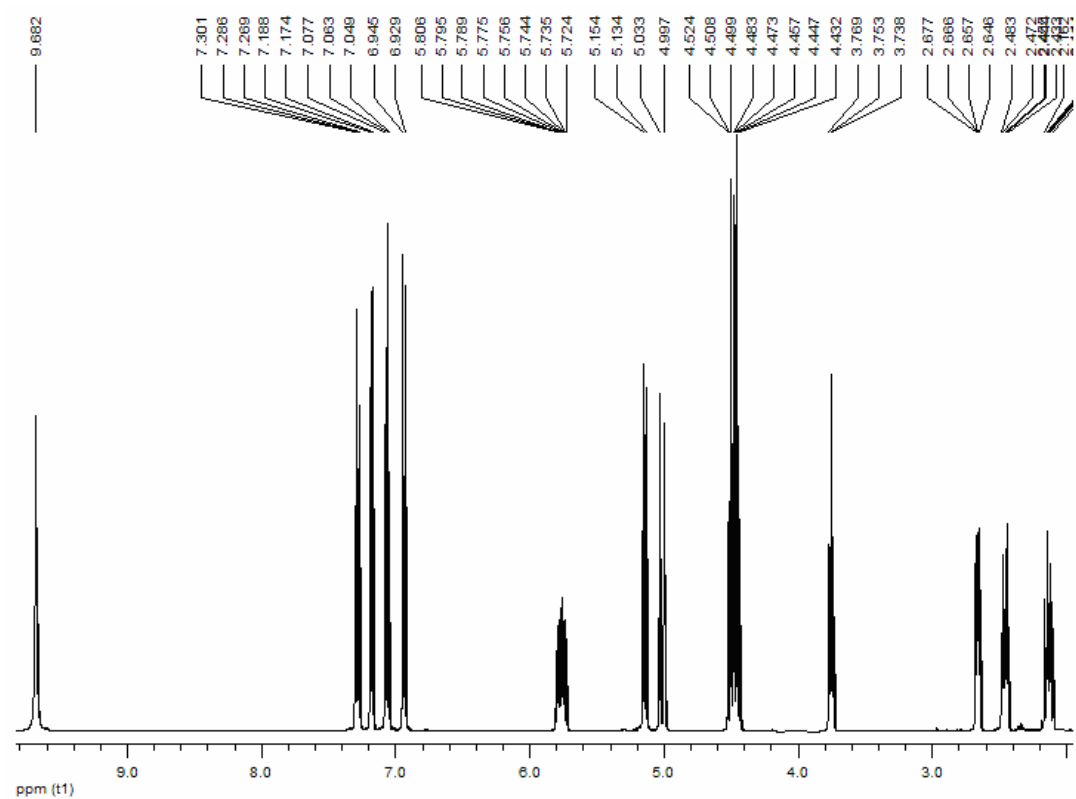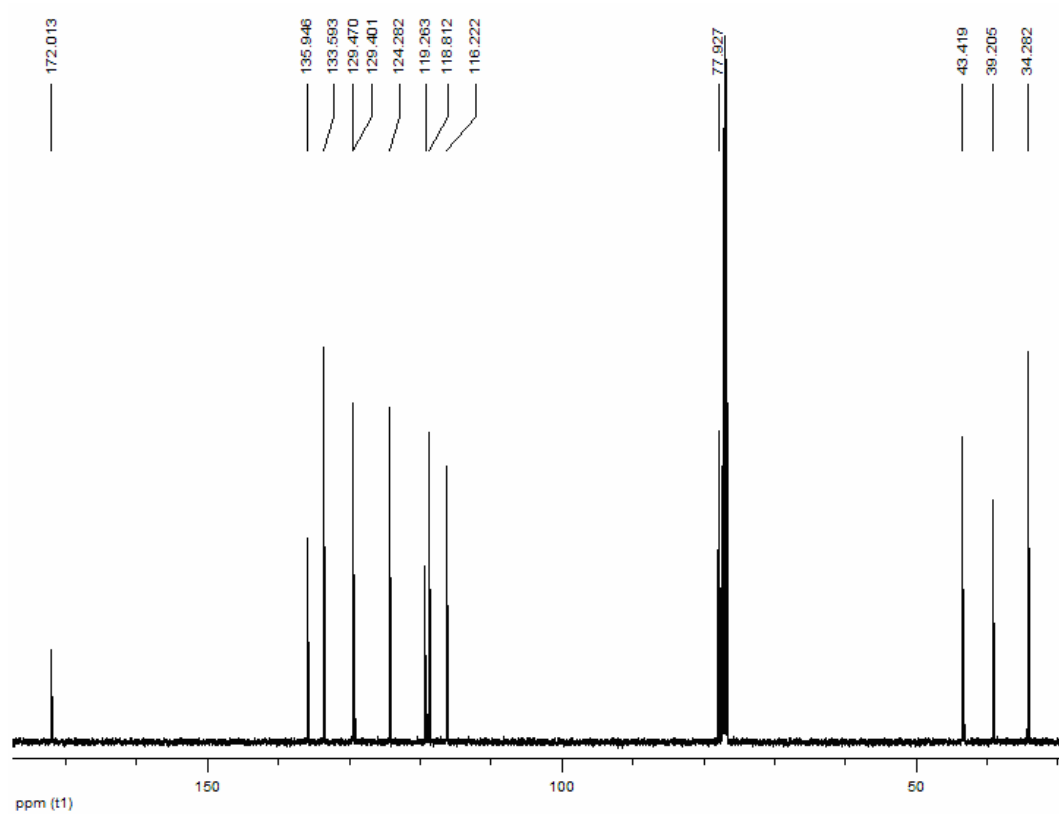

# Compound 6k

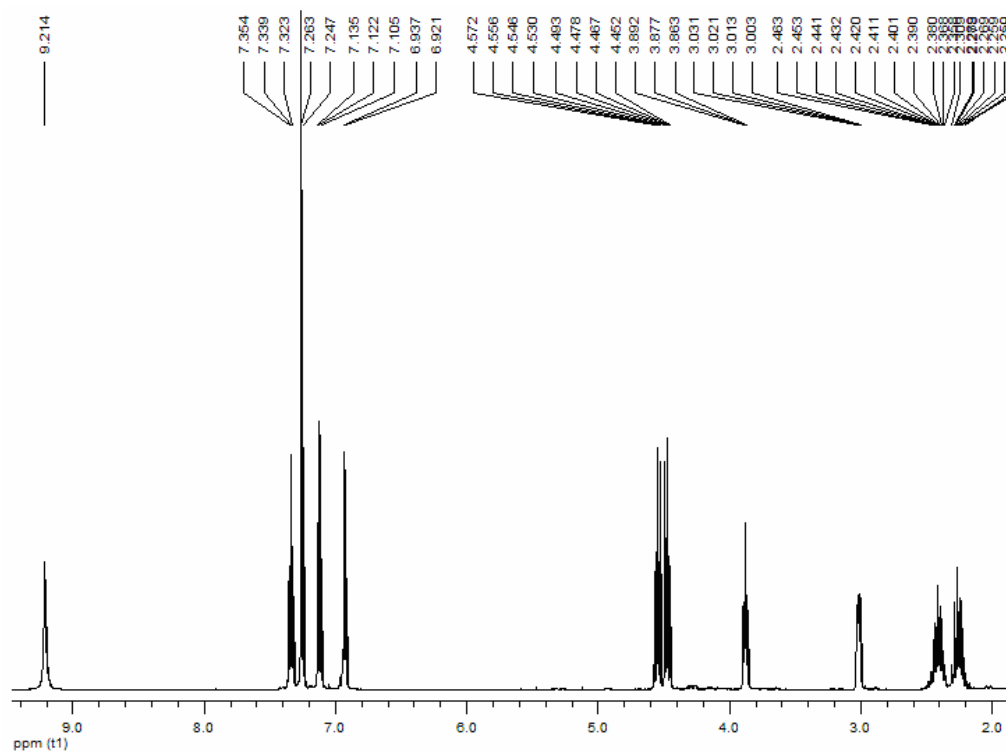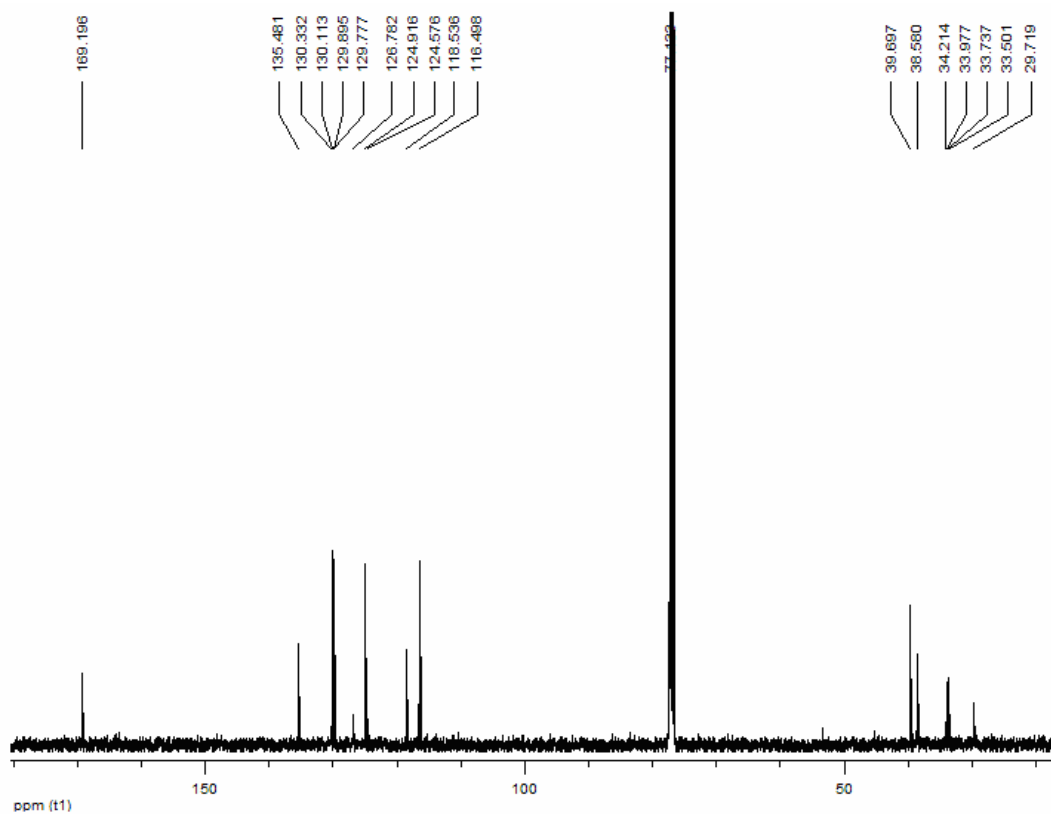

# Compound 6l

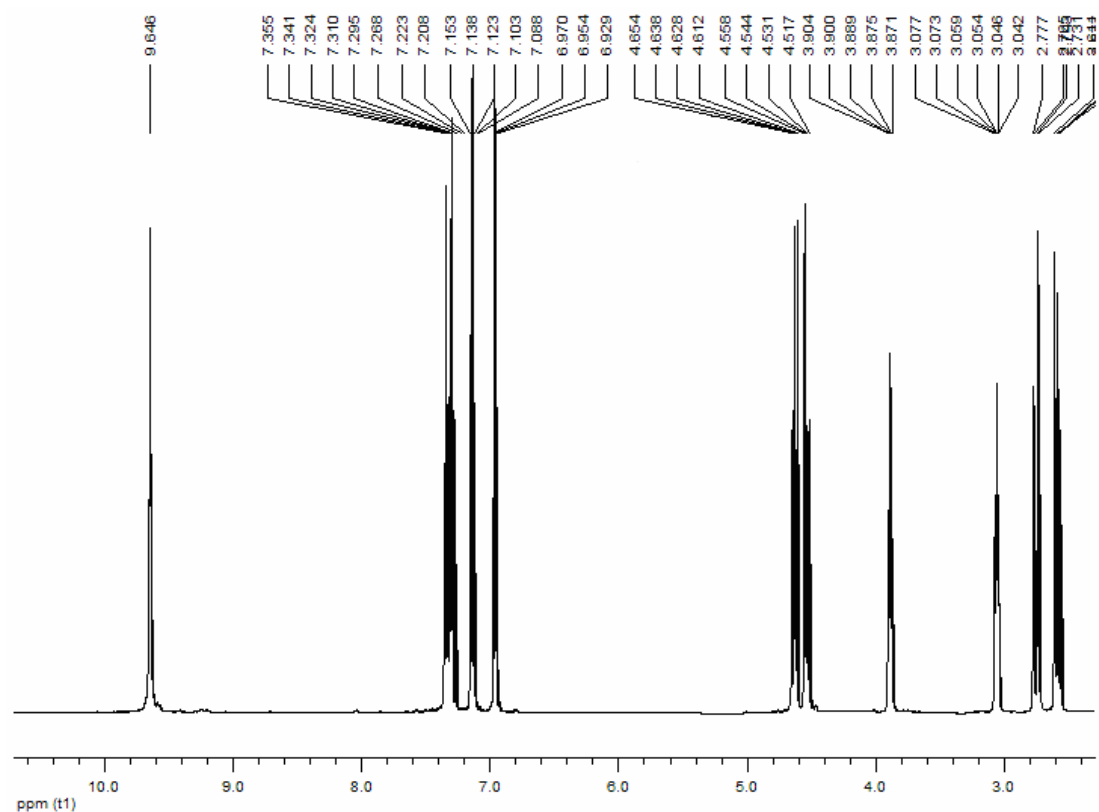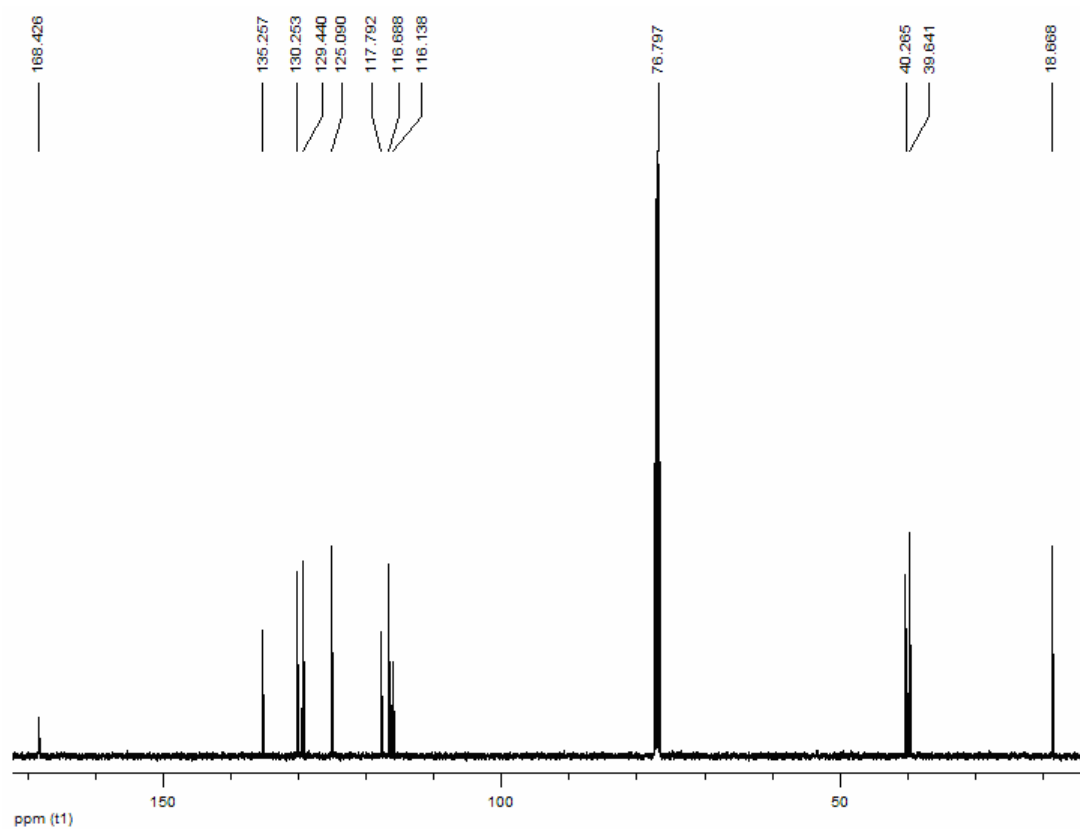



# Compound 6m

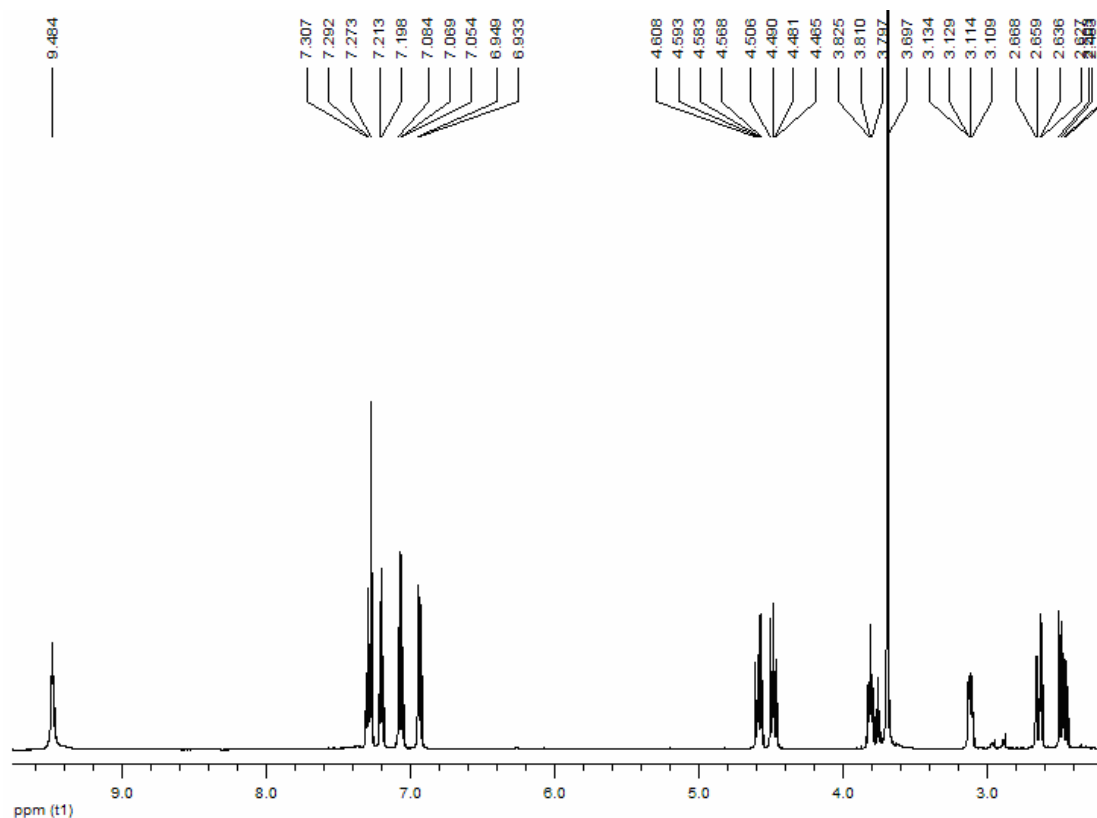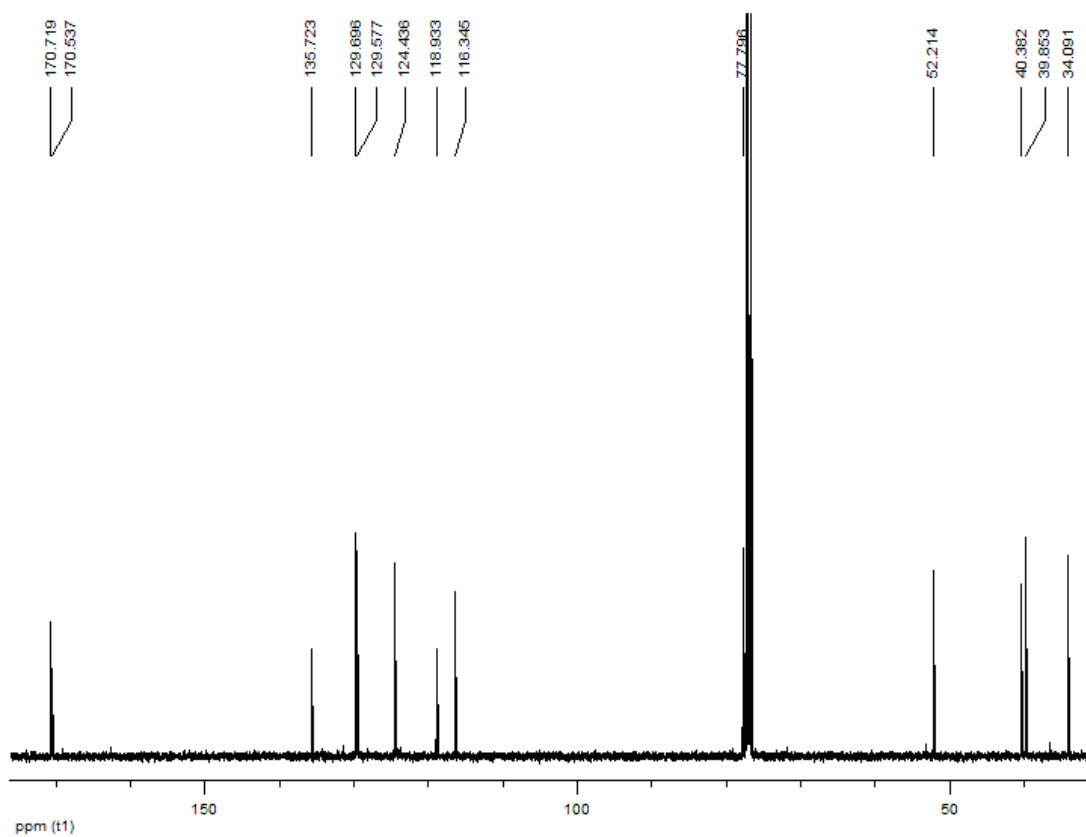

# Compound 6n

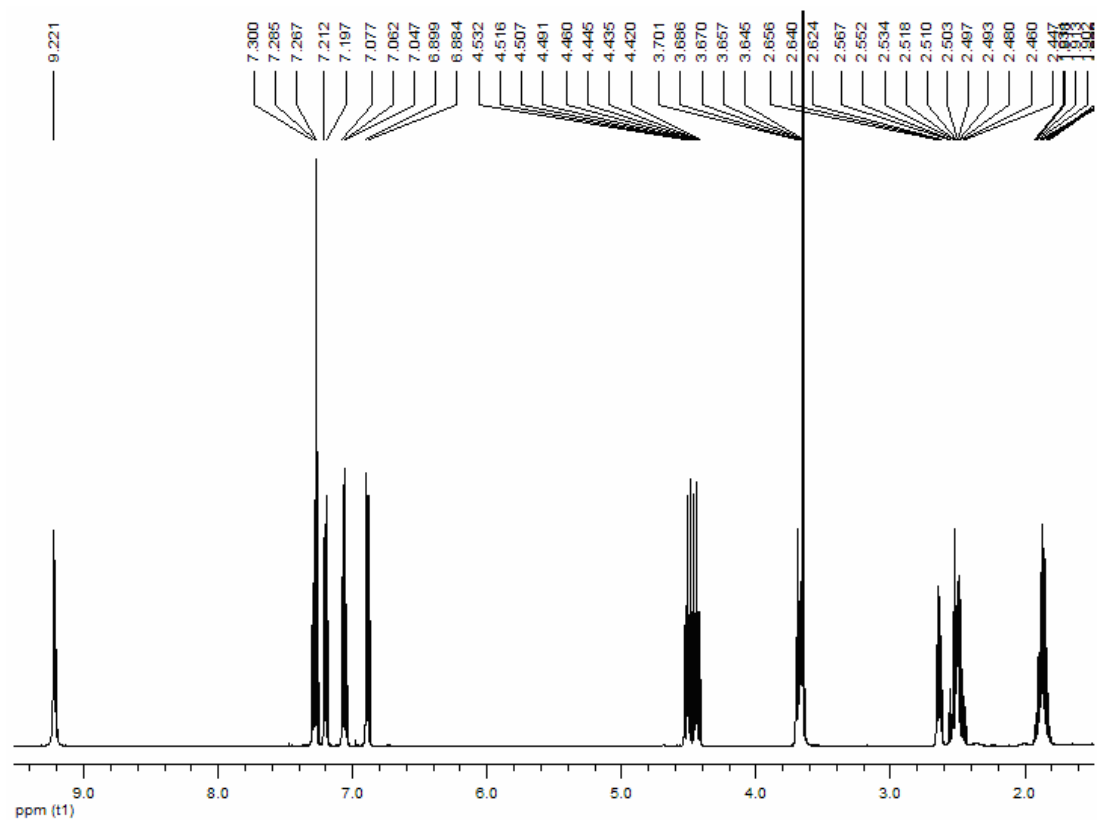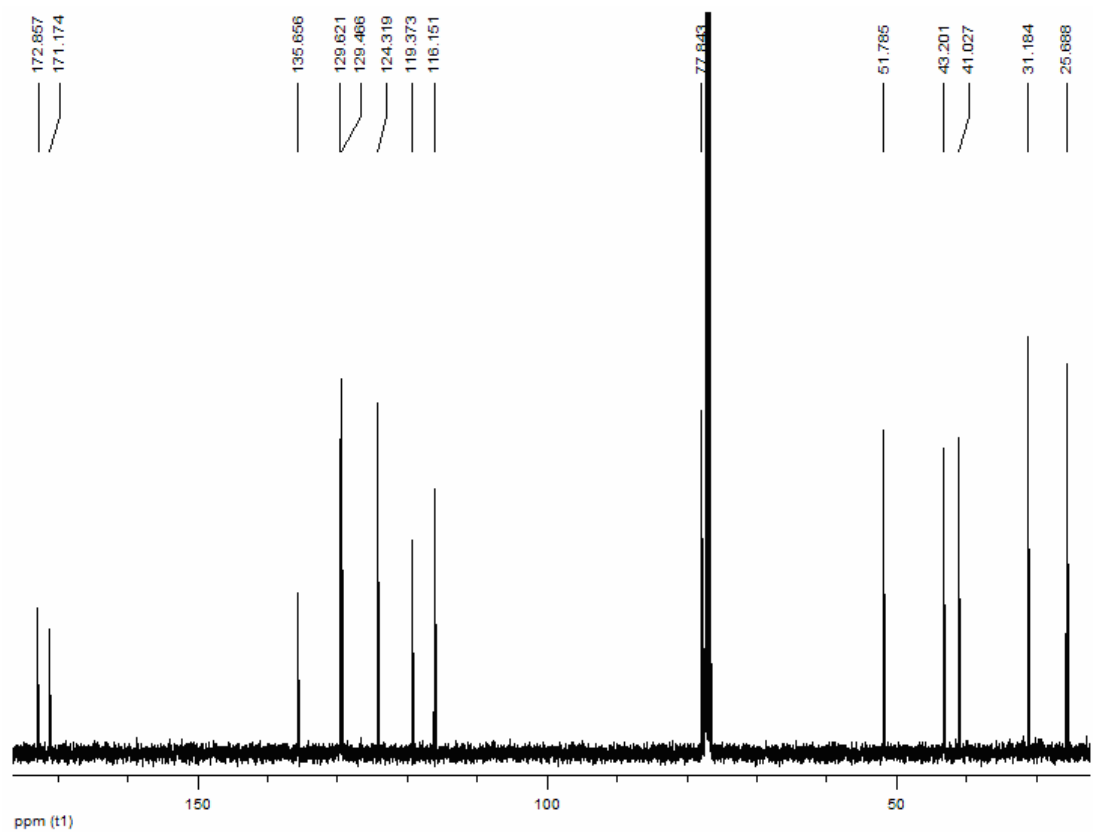

# Compound 6o

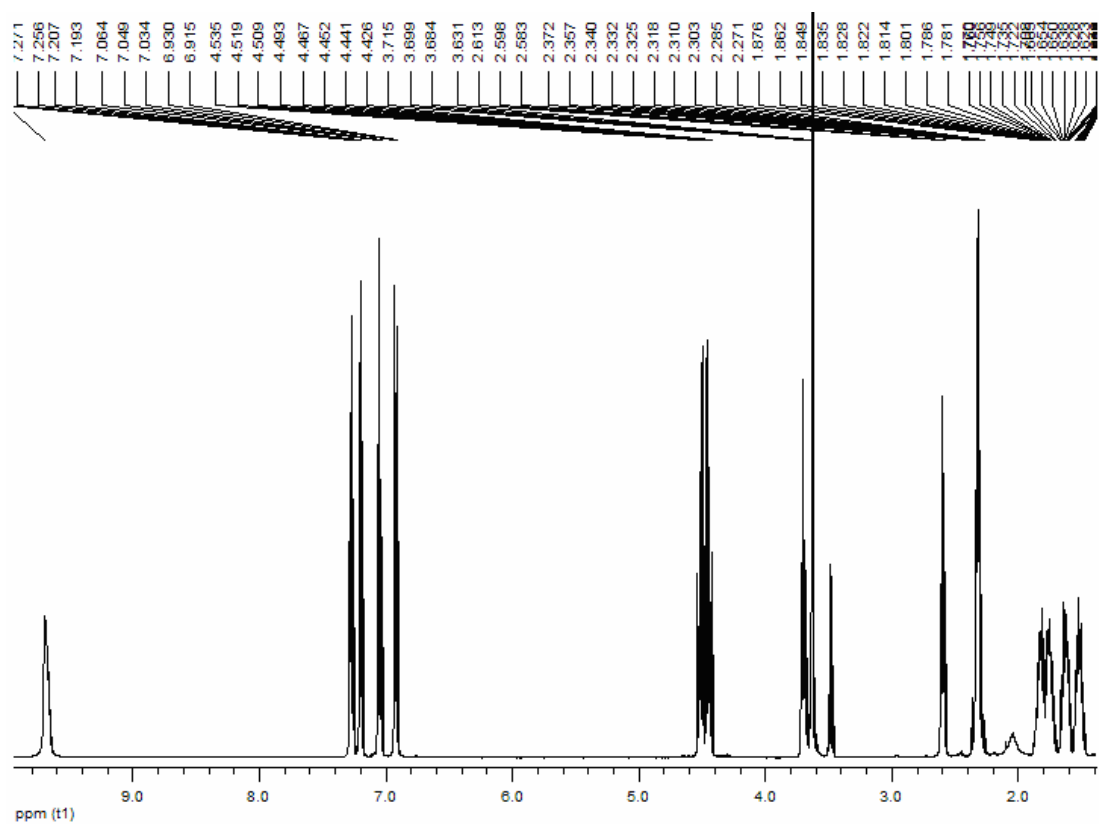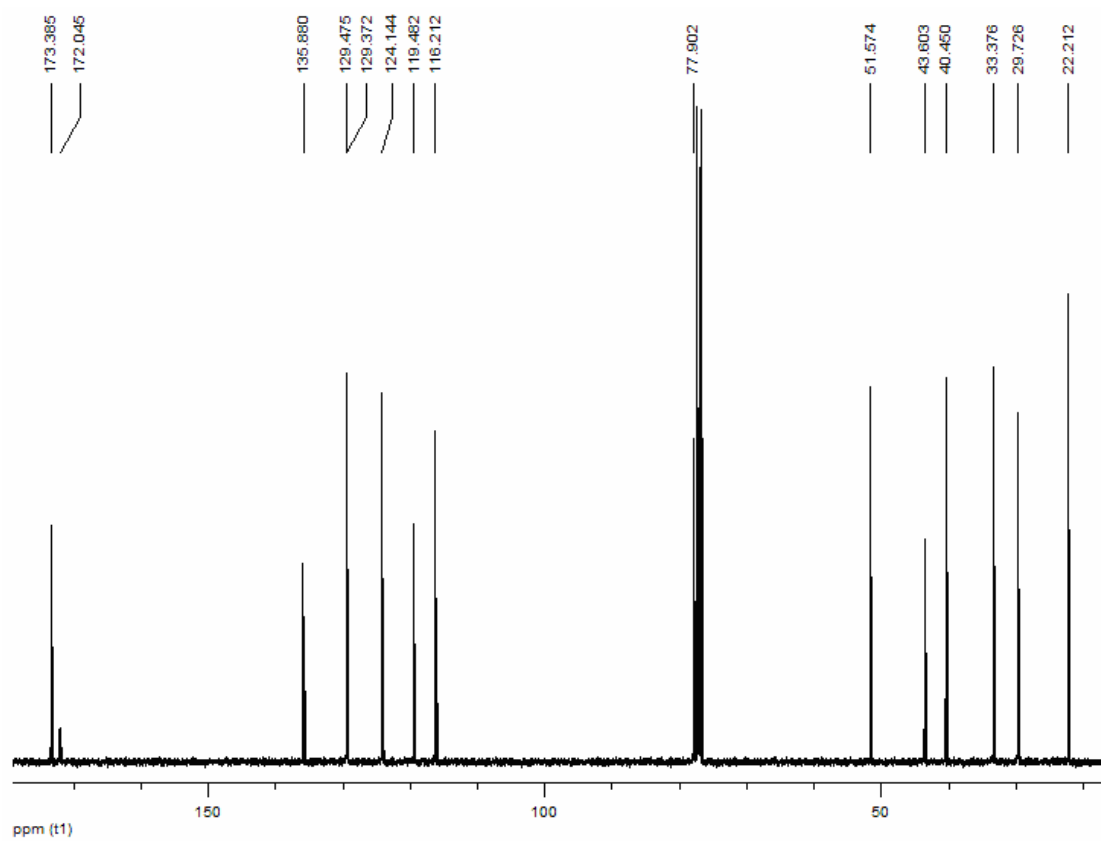

# Compound 6p

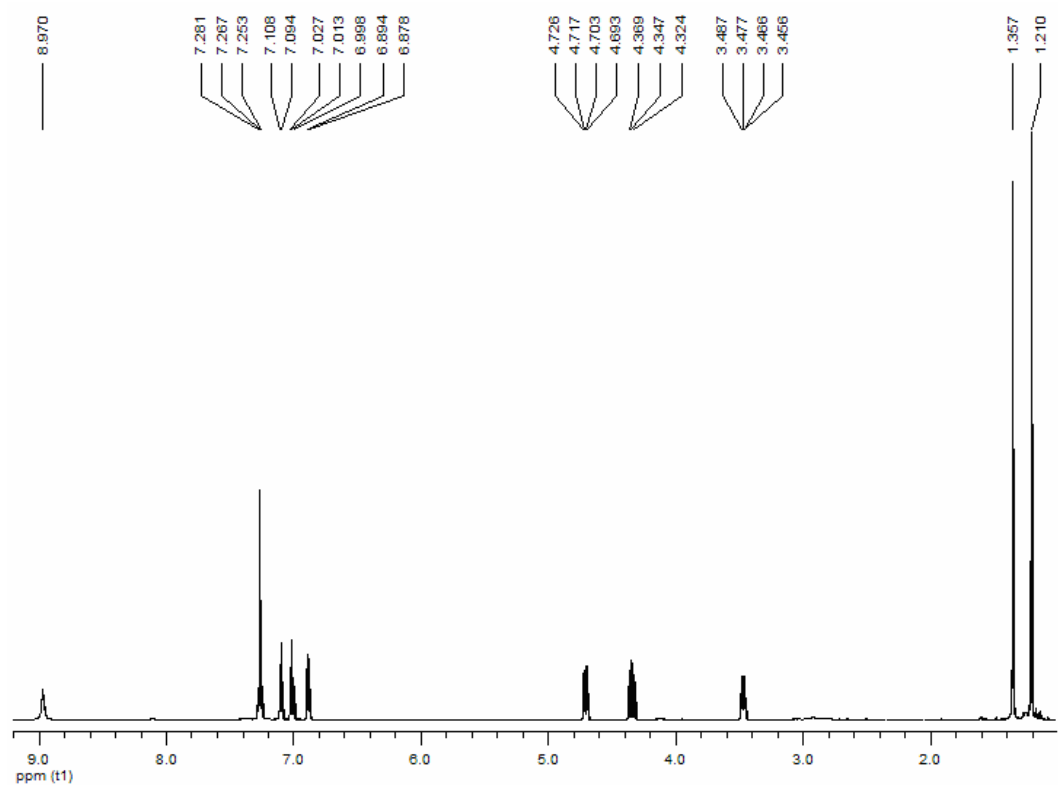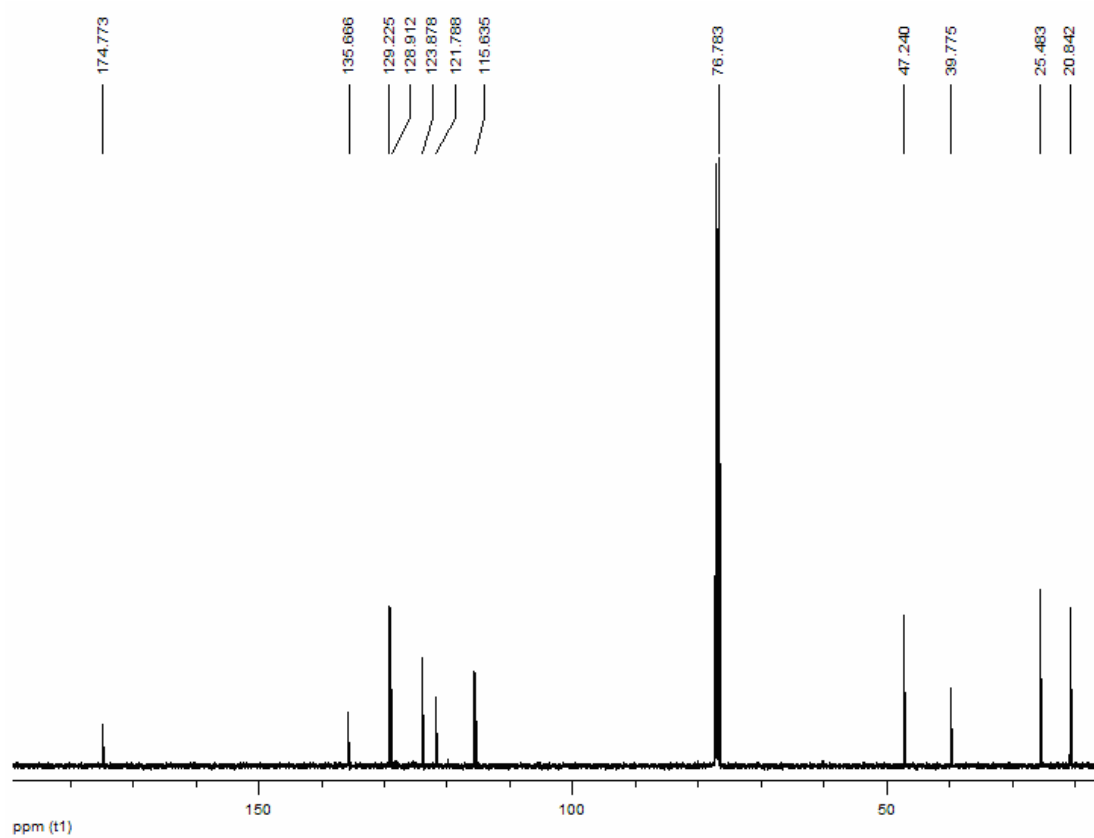

# Compound 6q

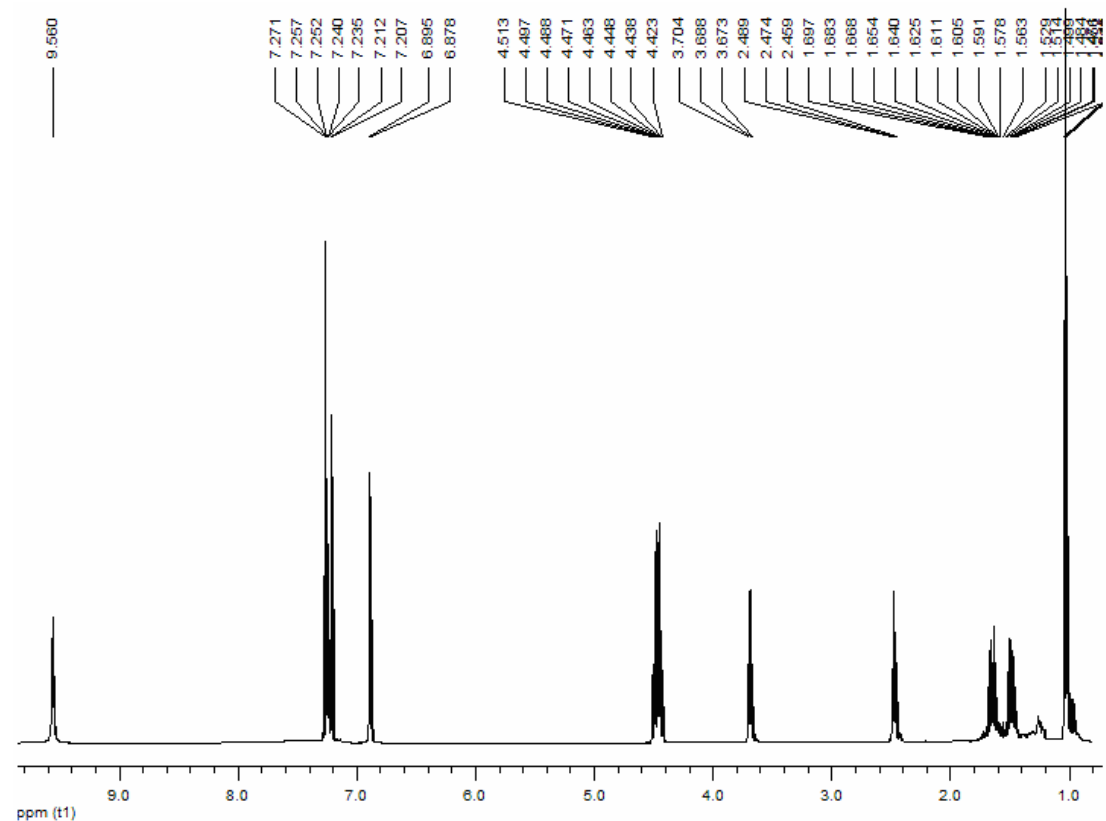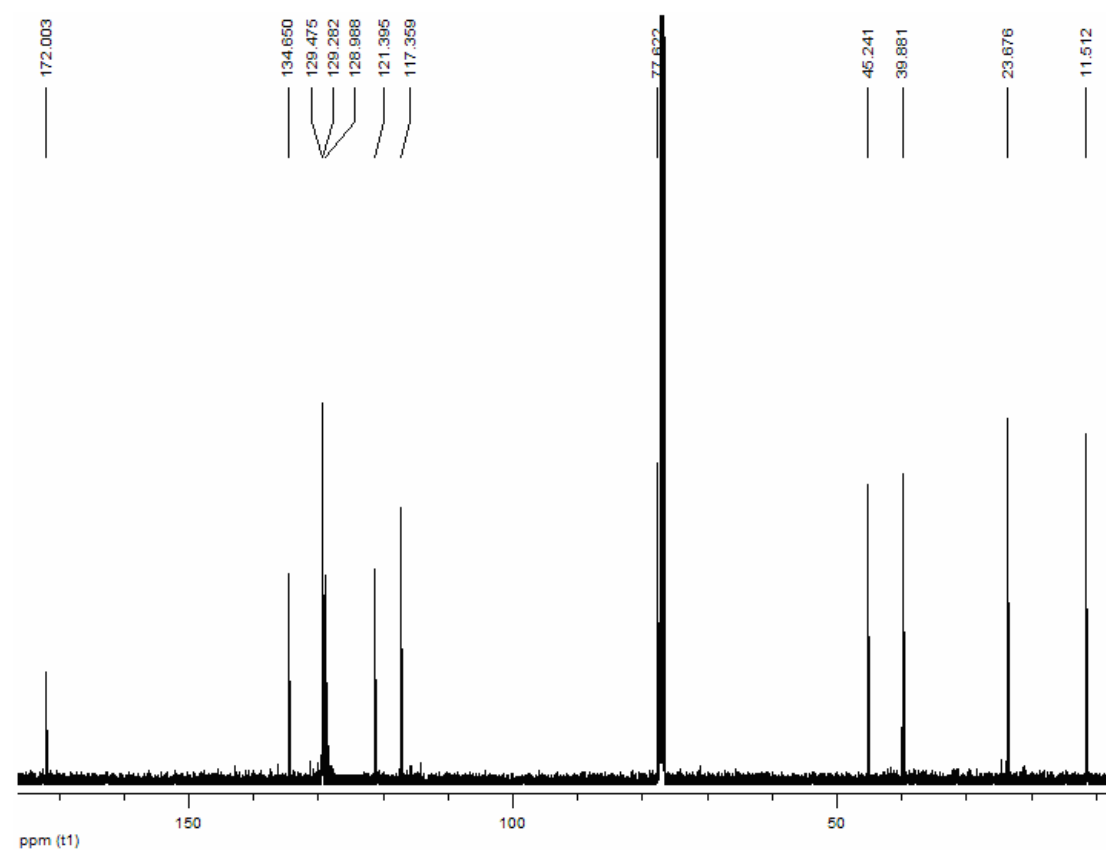

# Compound 6r

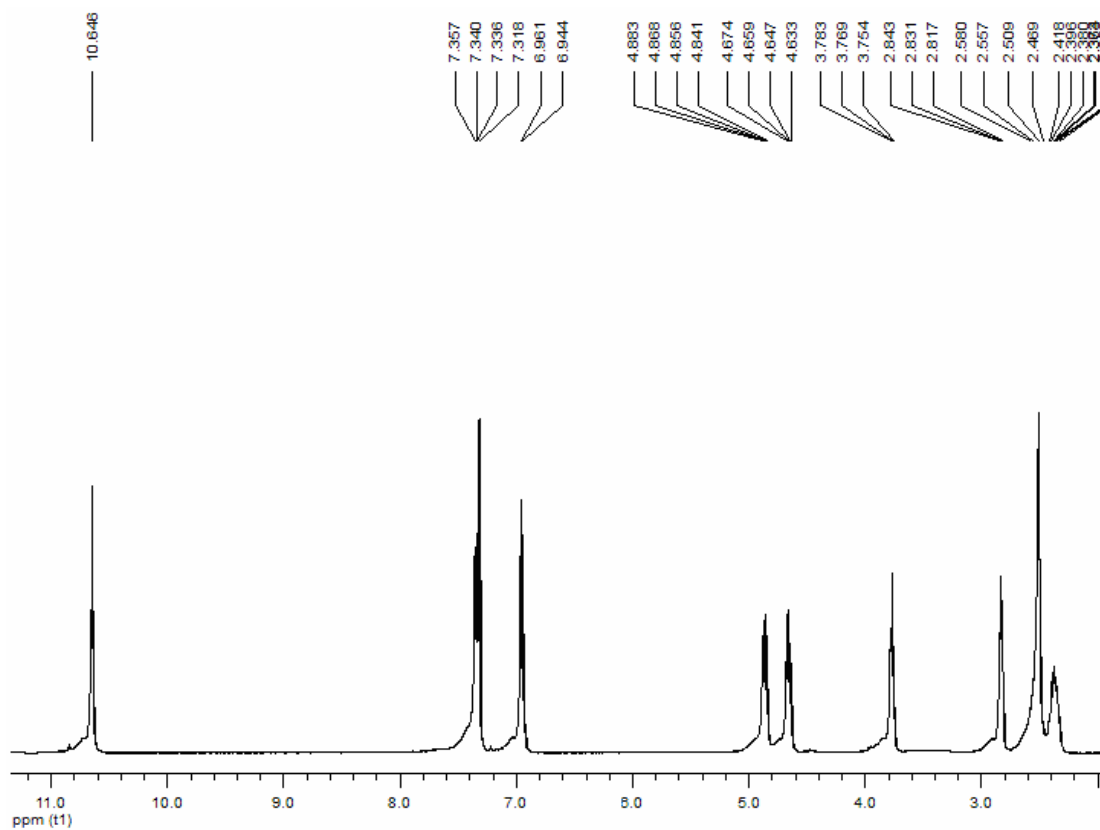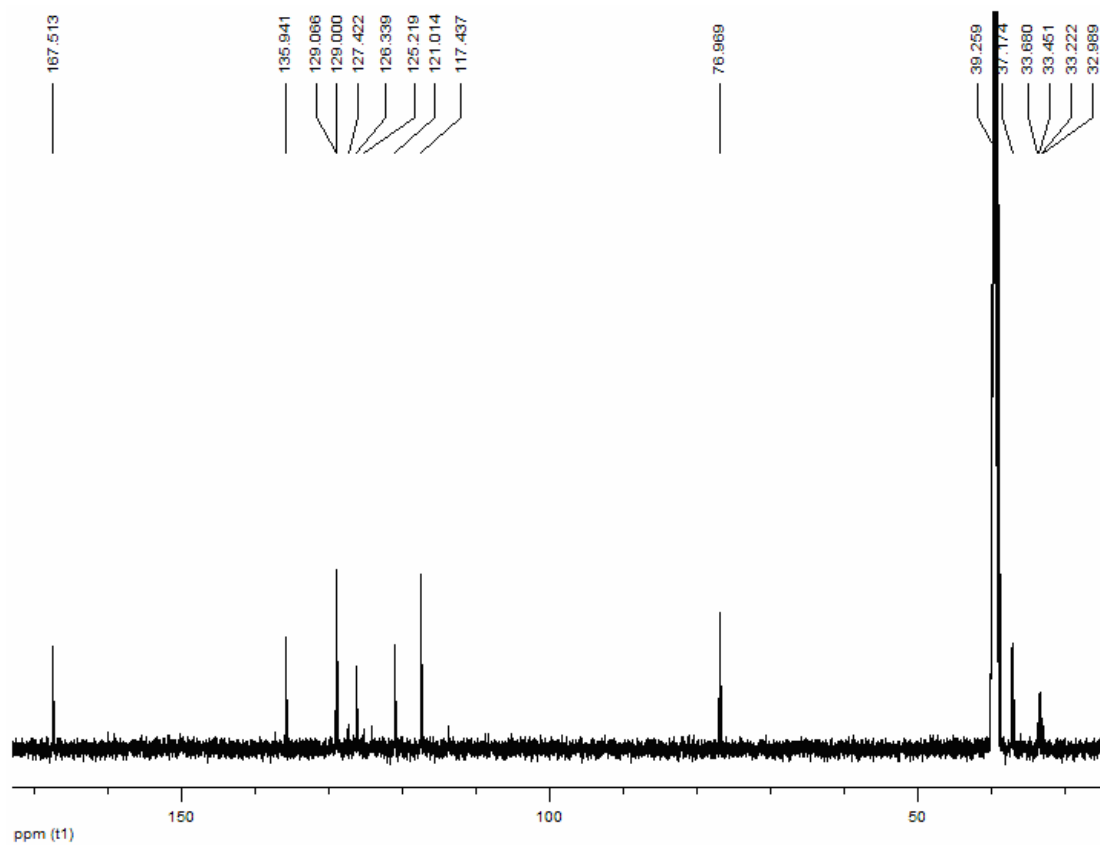

# Compound 6s

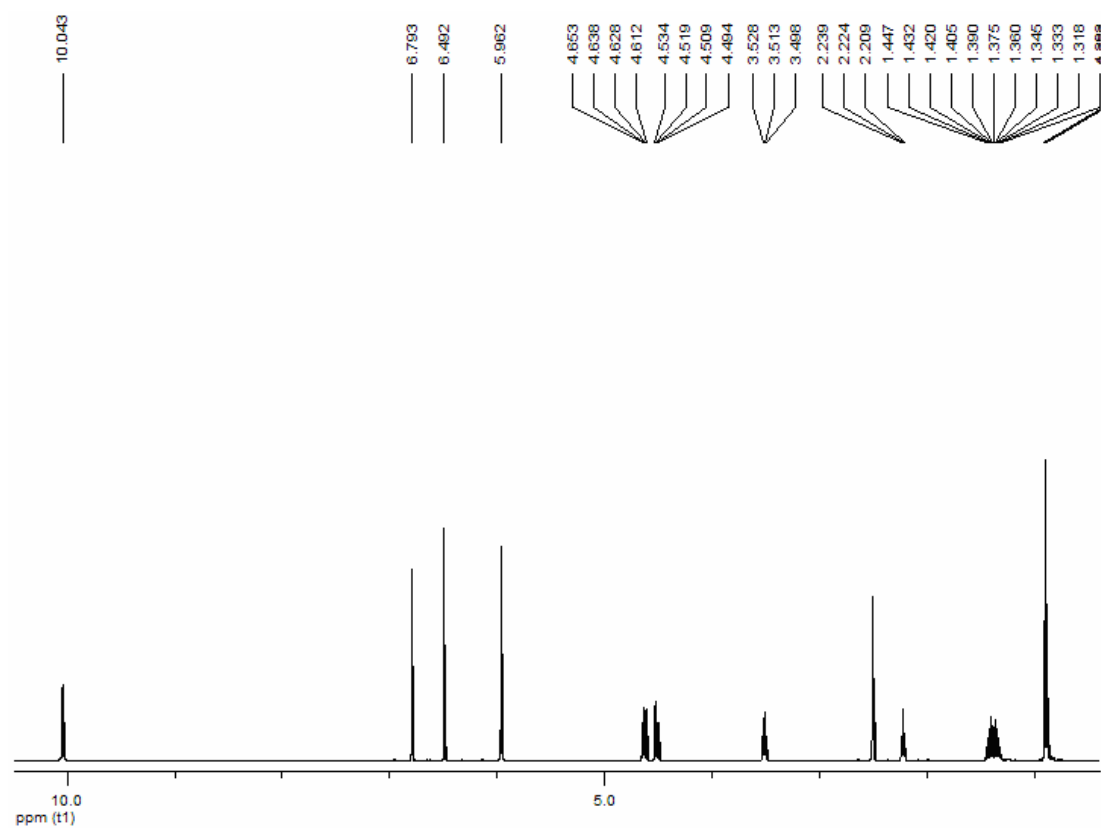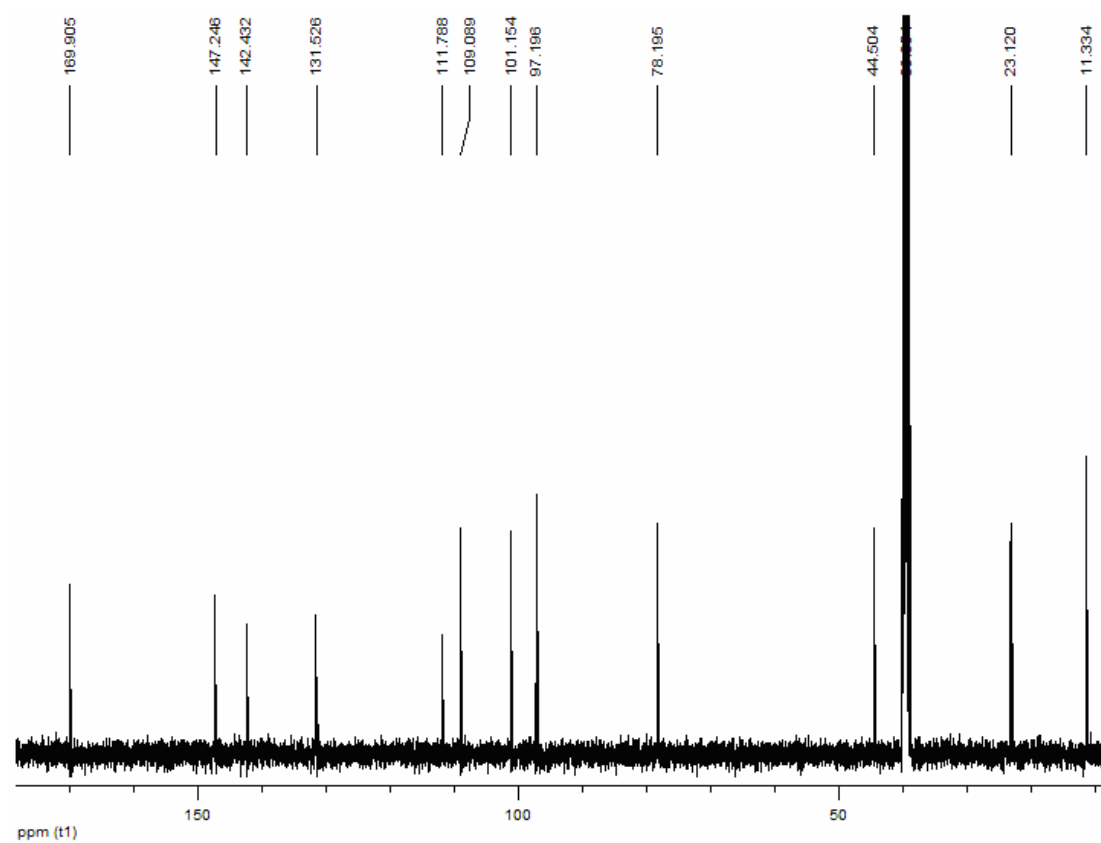

# Compound 6t

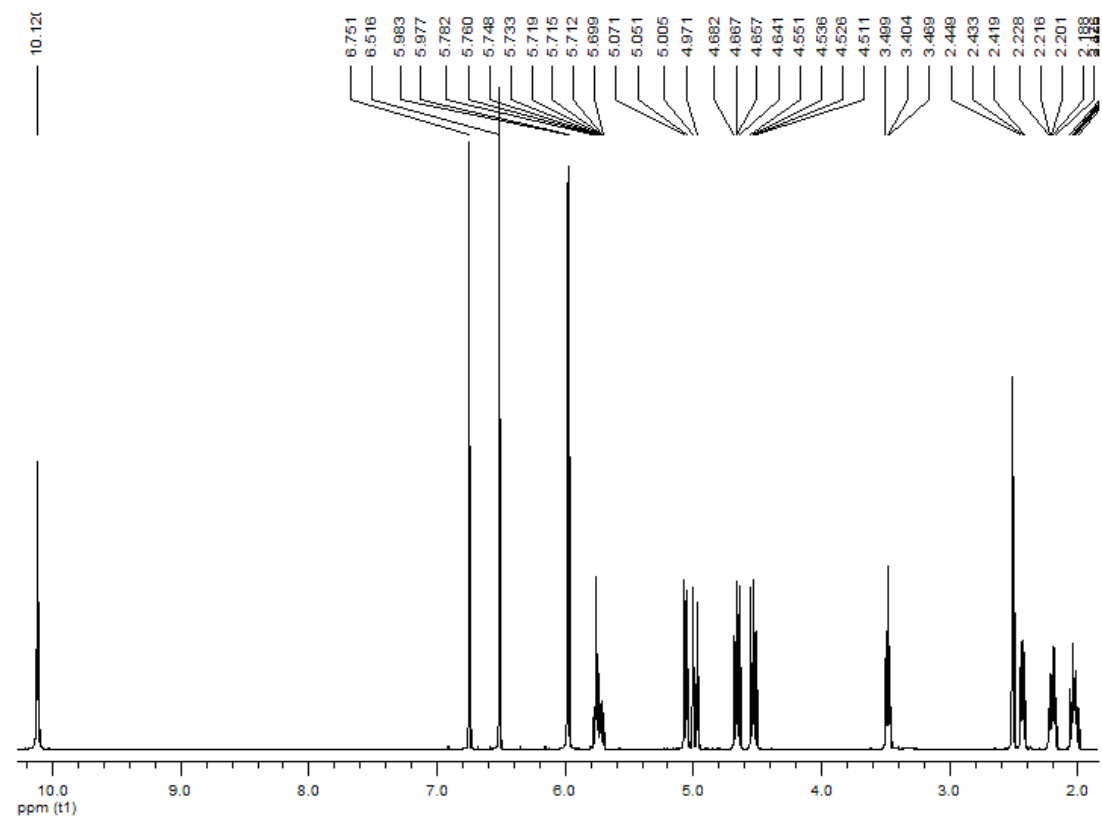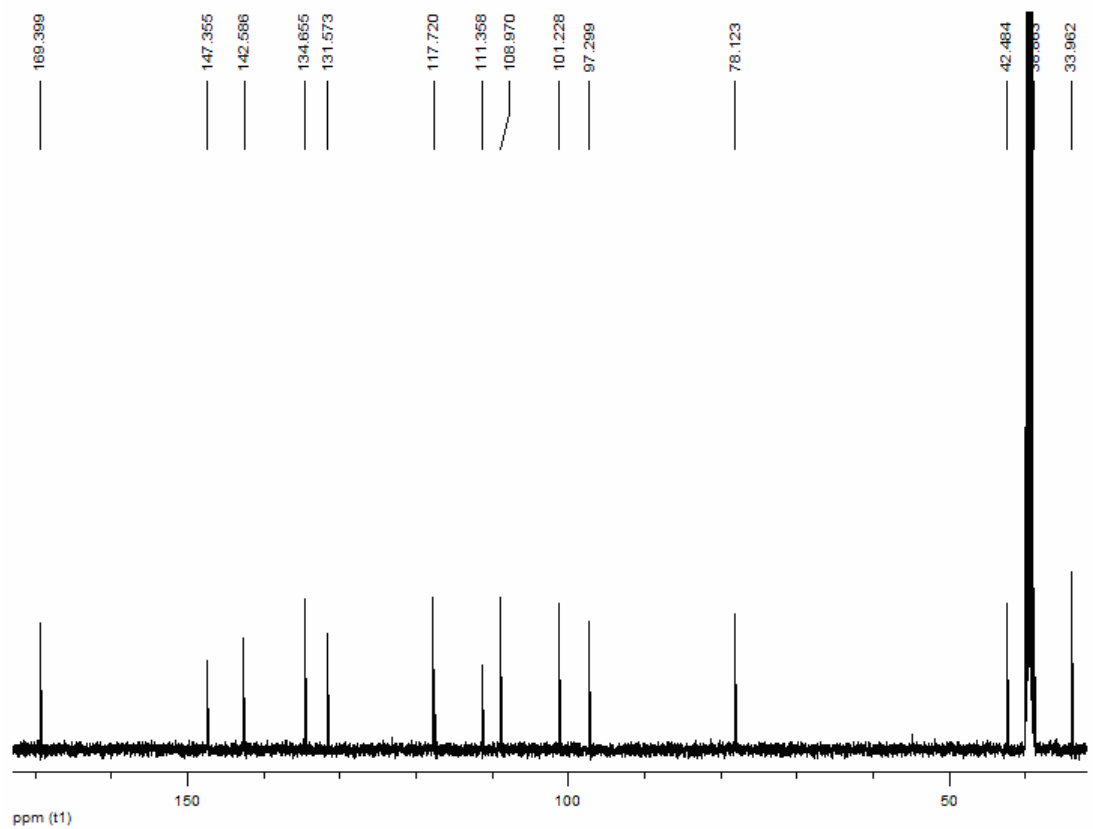



# Compound 6u

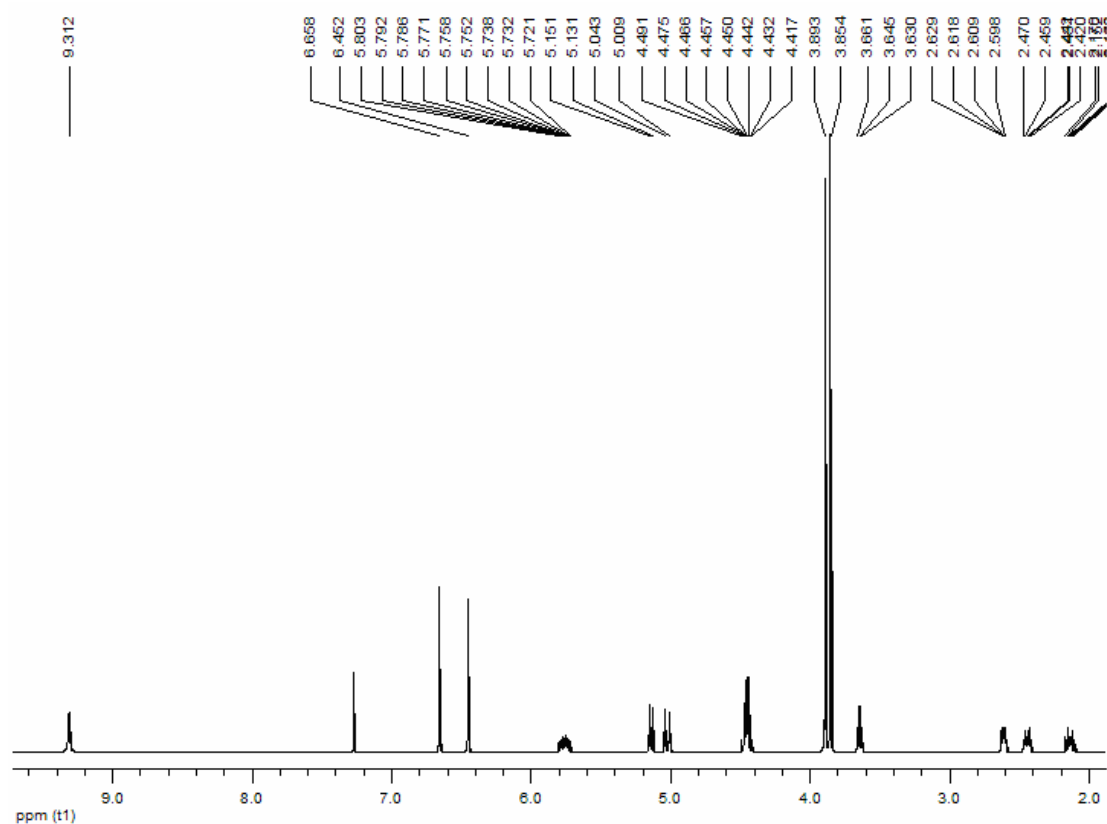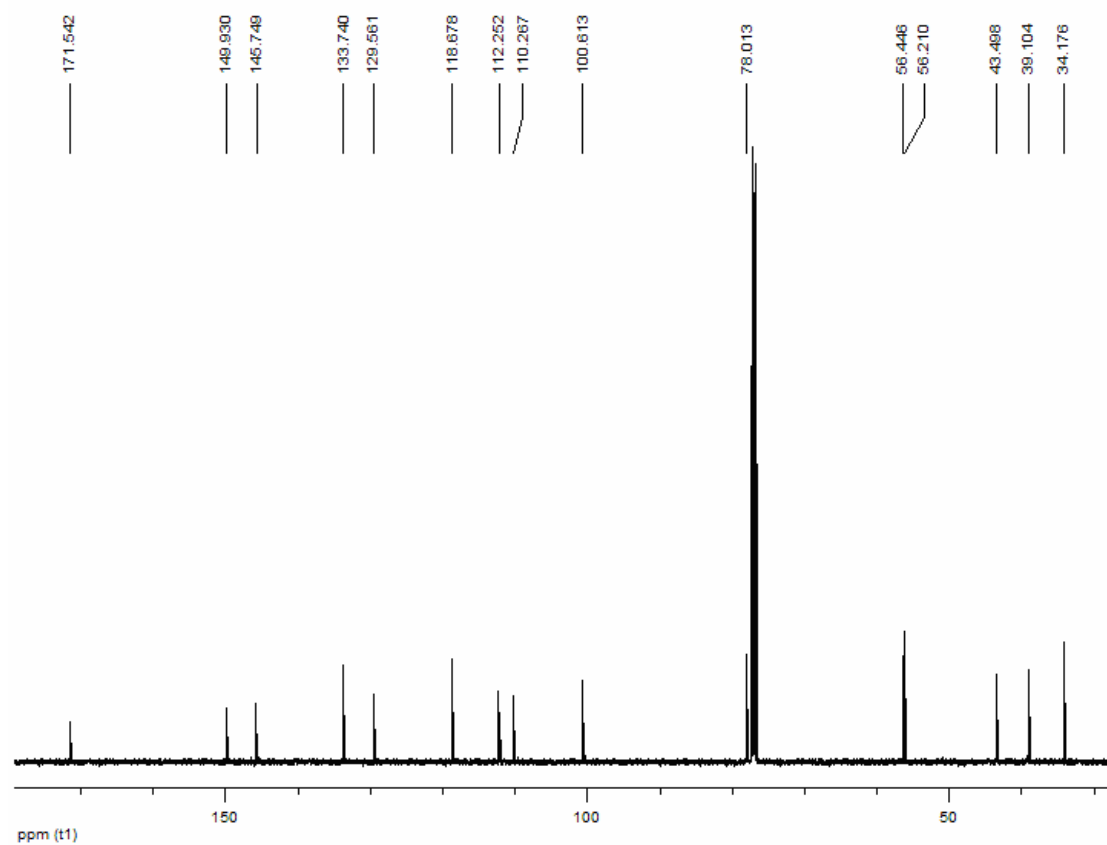

### H-H COSY spectra of 5q

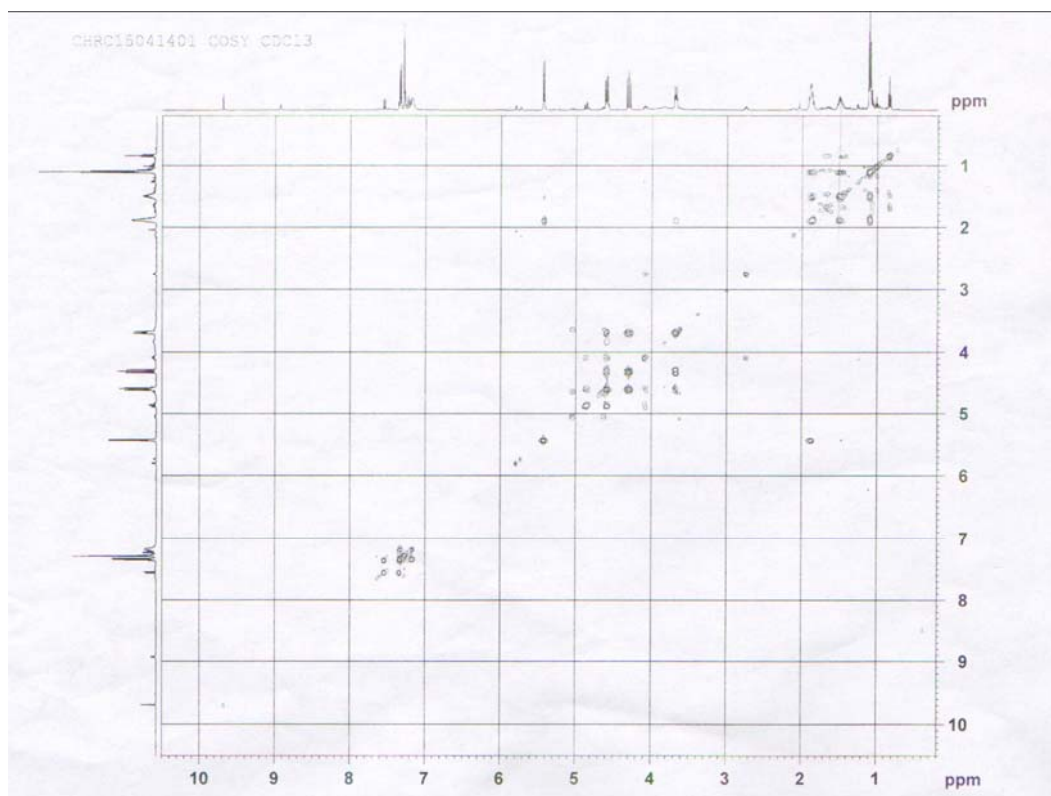

### H-H NOESY spectra of 5q

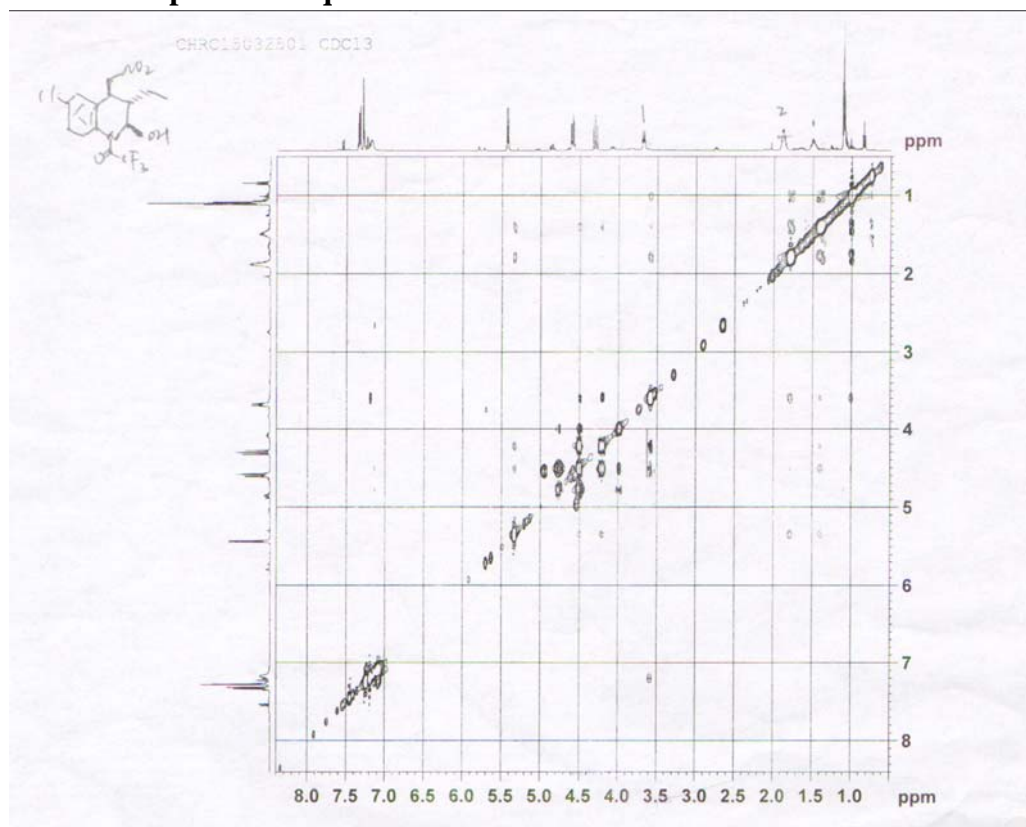

## 5. HPLC spectra of Michael adducts

### Compound 6a

#### Racemic adduct

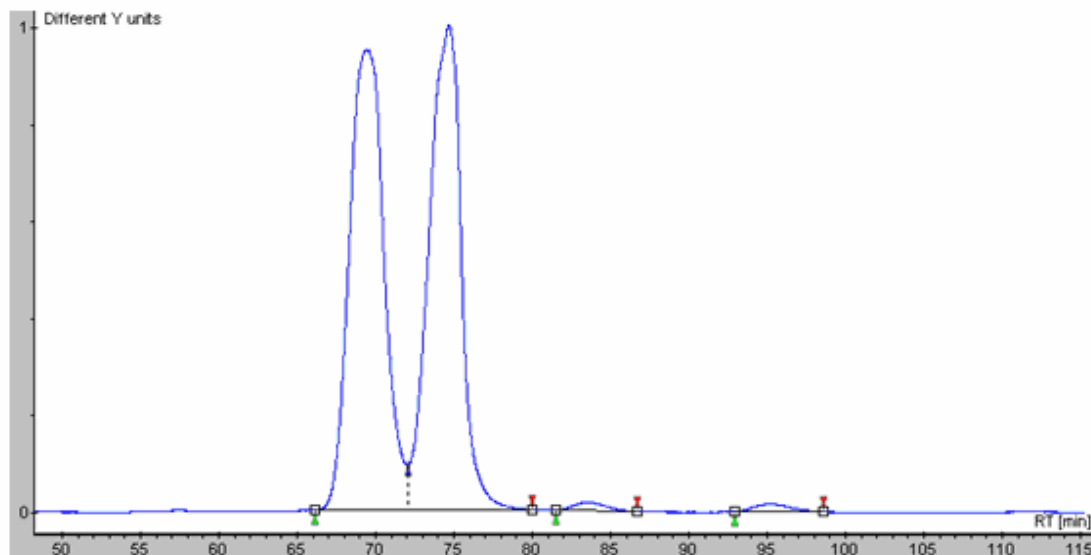

| # | Start [Min] | Time [Min] | End [Min] | Area [%] |
|---|-------------|------------|-----------|----------|
| 1 | 66.057      | 69.442     | 72.015    | 49.754   |
| 2 | 72.015      | 74.667     | 79.957    | 48.564   |
| 3 | 81.480      | 83.530     | 86.643    | 0.813    |
| 4 | 92.865      | 95.099     | 98.557    | 0.869    |

#### Asymmetric adduct

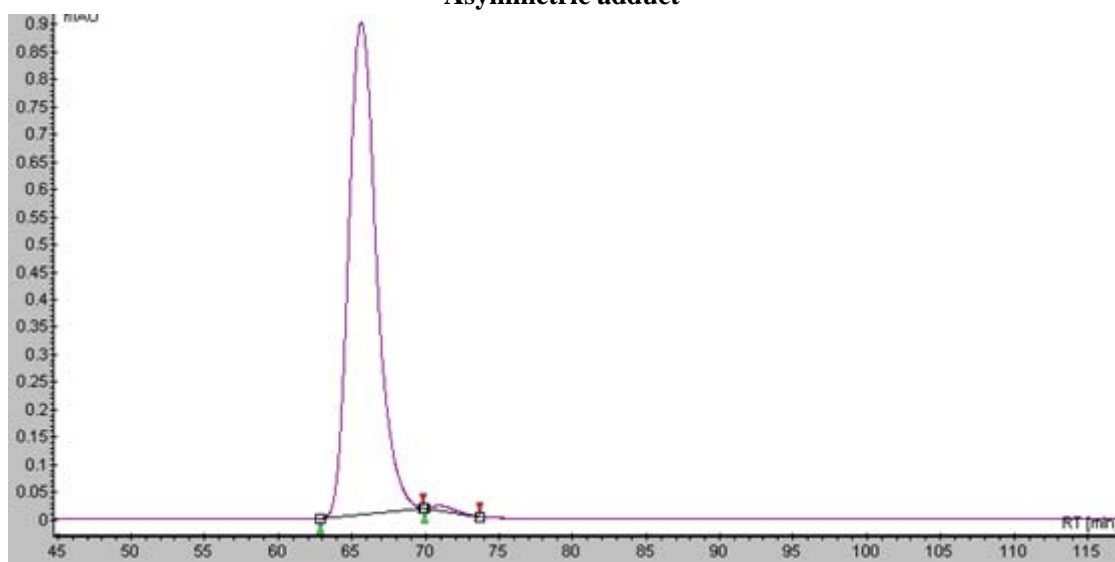

| # | Start [Min] | Time [Min] | End [Min] | Area [%] |
|---|-------------|------------|-----------|----------|
| 1 | 62.811      | 65.672     | 69.874    | 99.289   |
| 2 | 69.981      | 71.174     | 73.661    | 0.711    |

**Compound 6b****Racemic adduct**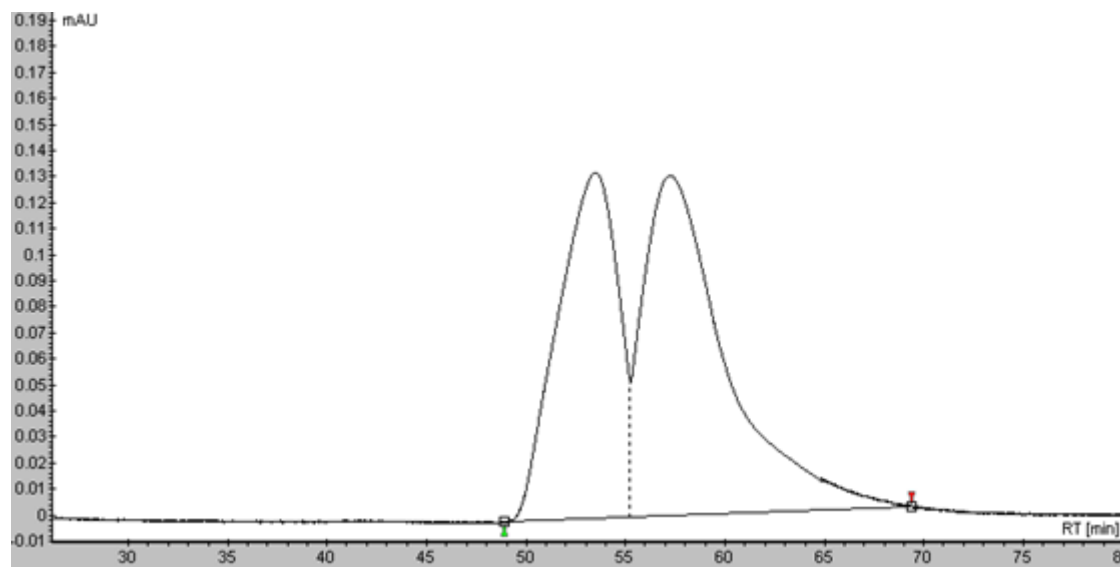

| # | Start [Min] | Time [Min] | End [Min] | Area [%] |
|---|-------------|------------|-----------|----------|
| 1 | 48.905      | 52.697     | 55.222    | 48.025   |
| 2 | 55.222      | 57.940     | 69.358    | 51.975   |

**Asymmetric adduct**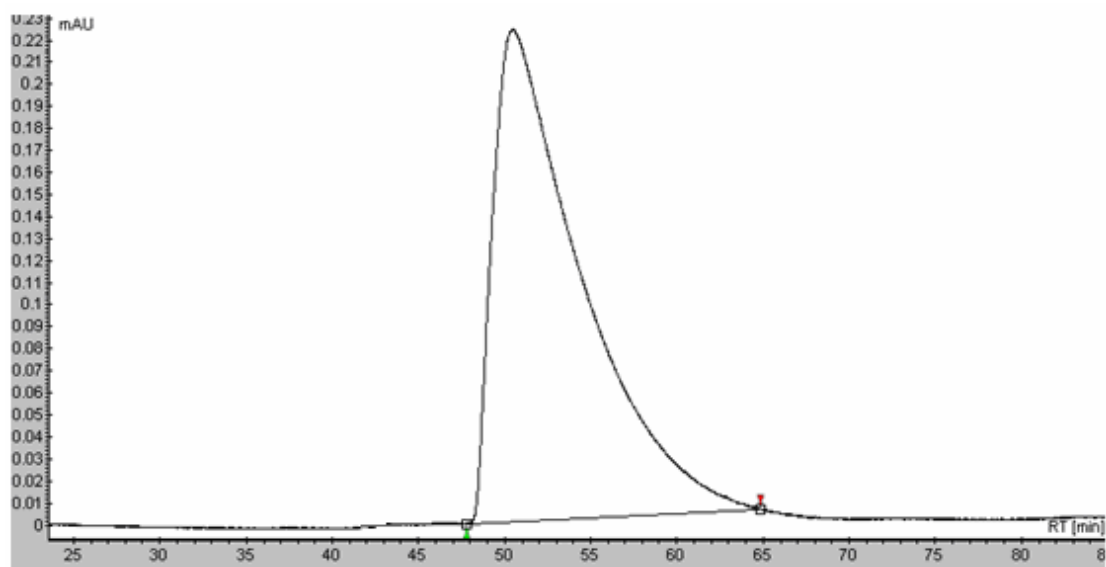

| # | Start [Min] | Time [Min] | End [Min] | Area [%] |
|---|-------------|------------|-----------|----------|
| 1 | 47.770      | 50.489     | 64.881    | 100.000  |

## Compound 6c

### Racemic adduct

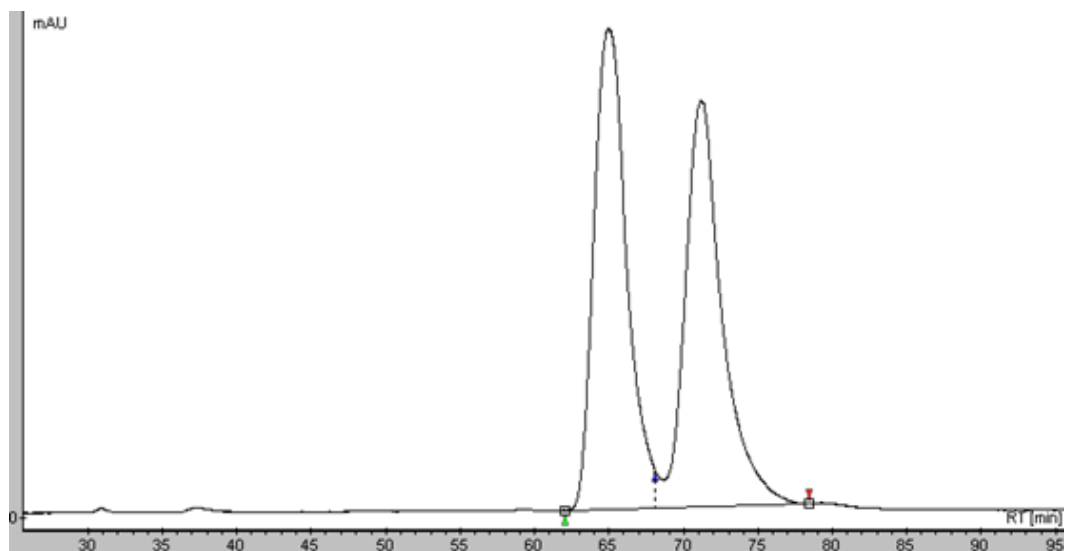

| # | Start [Min] | Time [Min] | End [Min] | Area [%] |
|---|-------------|------------|-----------|----------|
| 1 | 62.037      | 64.950     | 68.105    | 50.975   |
| 2 | 68.105      | 71.214     | 78.419    | 49.025   |

### Asymmetric adduct

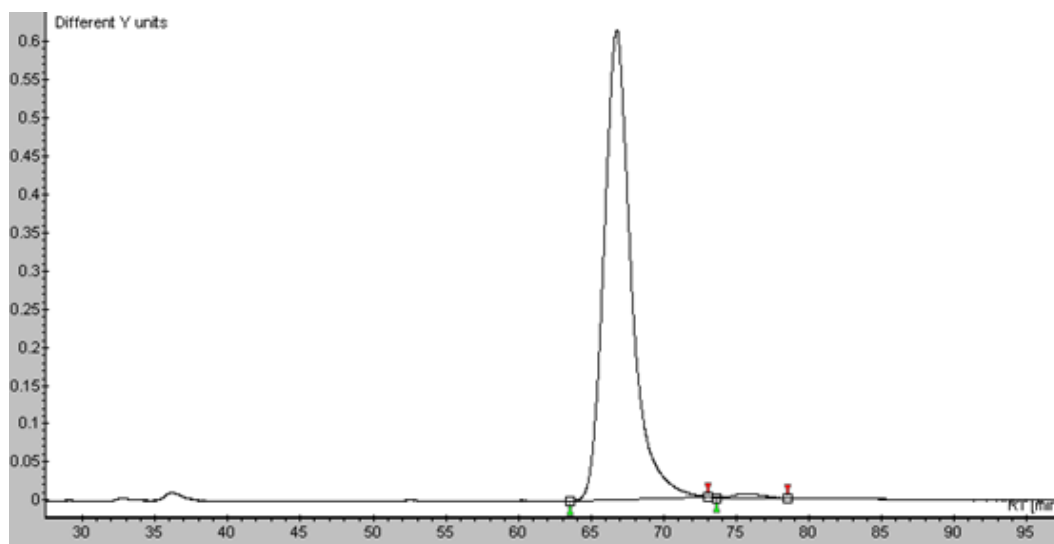

| # | Start [Min] | Time [Min] | End [Min] | Area [%] |
|---|-------------|------------|-----------|----------|
| 1 | 63.588      | 66.776     | 73.049    | 98.981   |
| 2 | 73.646      | 75.746     | 78.504    | 1.019    |

## Compound 6d

### Racemic adduct

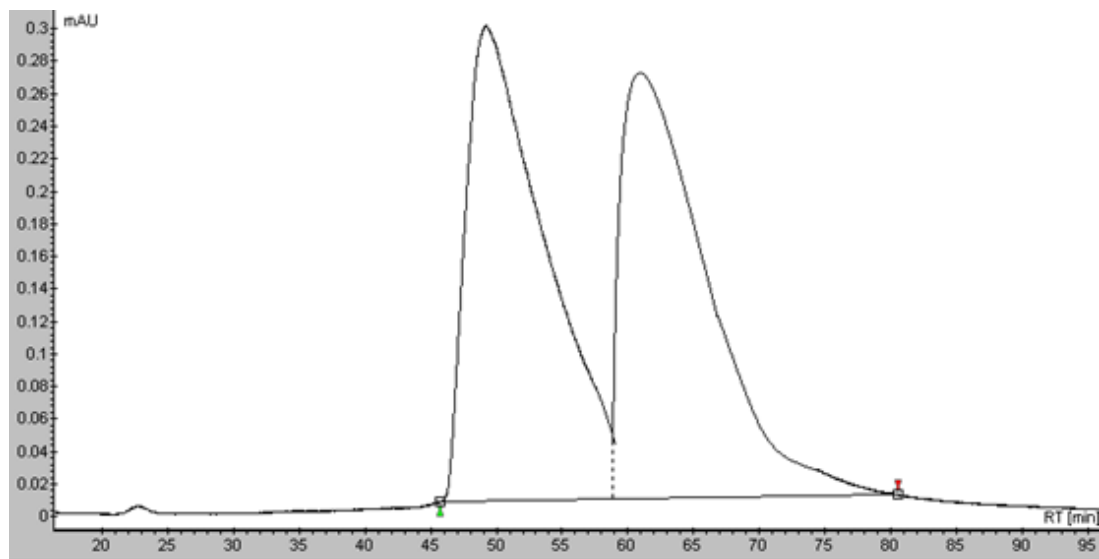

| # | Start [Min] | Time [Min] | End [Min] | Area [%] |
|---|-------------|------------|-----------|----------|
| 1 | 45.671      | 49.249     | 58.799    | 51.399   |
| 2 | 58.799      | 61.578     | 80.587    | 48.601   |

### Asymmetric adduct

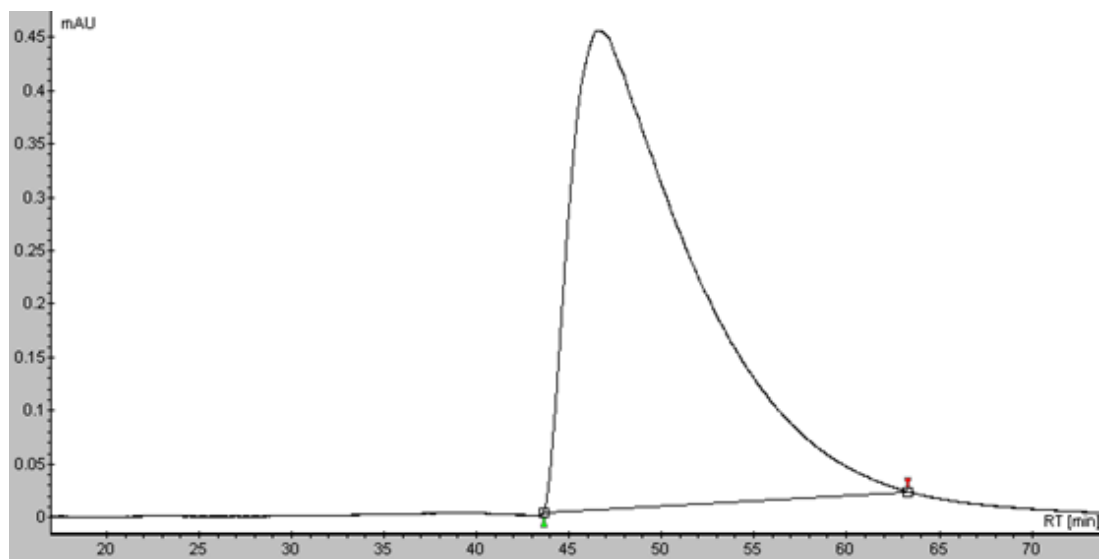

| # | Start [Min] | Time [Min] | End [Min] | Area [%] |
|---|-------------|------------|-----------|----------|
| 1 | 43.604      | 46.583     | 63.293    | 100.000  |

## Compound 6e

### Racemic adduct

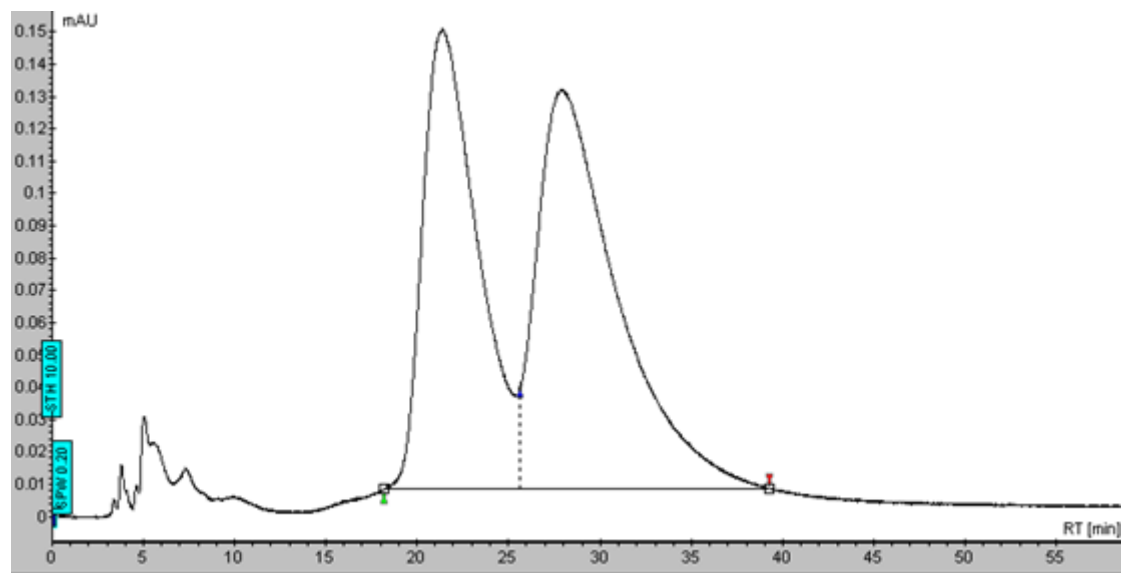

| # | Start [Min] | Time [Min] | End [Min] | Area [%] |
|---|-------------|------------|-----------|----------|
| 1 | 18.168      | 21.358     | 25.615    | 44.285   |
| 2 | 25.615      | 27.918     | 39.282    | 55.715   |

### Asymmetric adduct

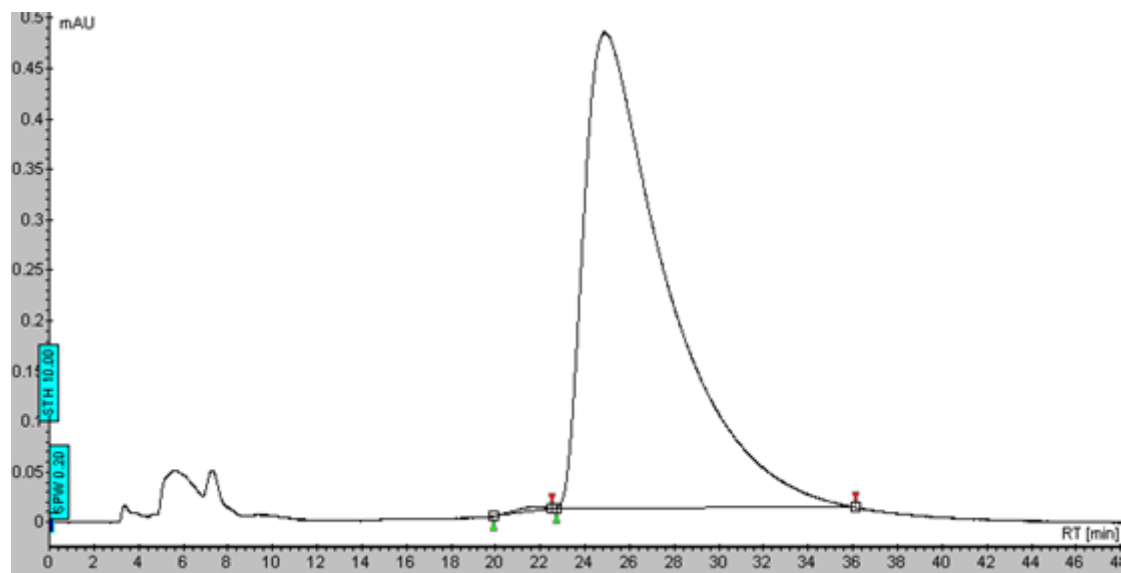

| # | Start [Min] | Time [Min] | End [Min] | Area [%] |
|---|-------------|------------|-----------|----------|
| 1 | 19.897      | 21.425     | 22.530    | 0.299    |
| 2 | 22.691      | 24.892     | 36.112    | 99.701   |

## Compound 6f

### Racemic adduct

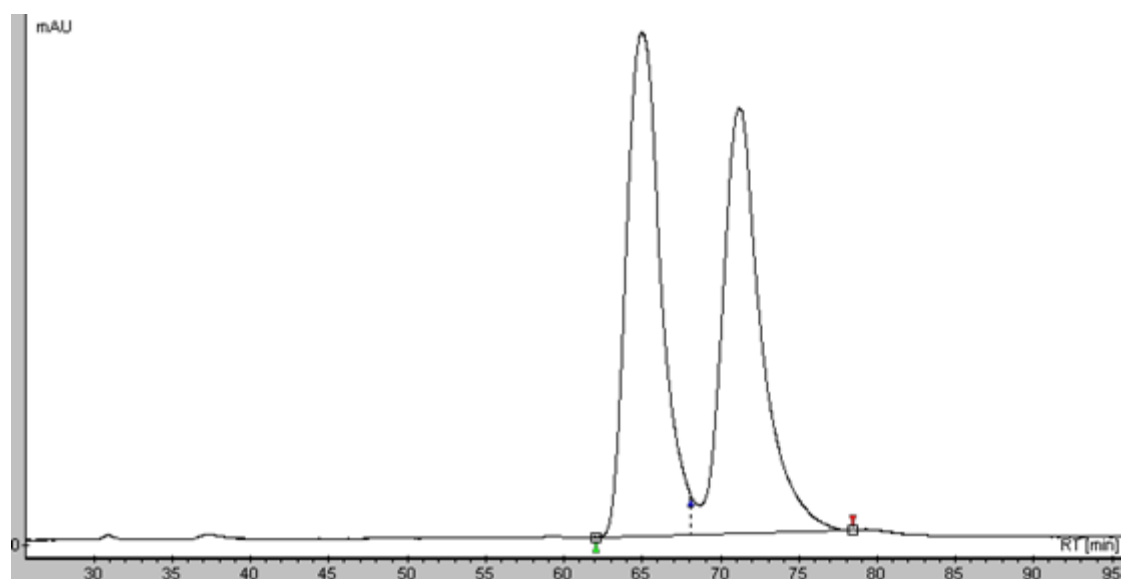

| # | Start [Min] | Time [Min] | End [Min] | Area [%] |
|---|-------------|------------|-----------|----------|
| 1 | 62.037      | 64.950     | 68.105    | 50.975   |
| 2 | 68.105      | 71.214     | 78.419    | 49.025   |

### Asymmetric adduct

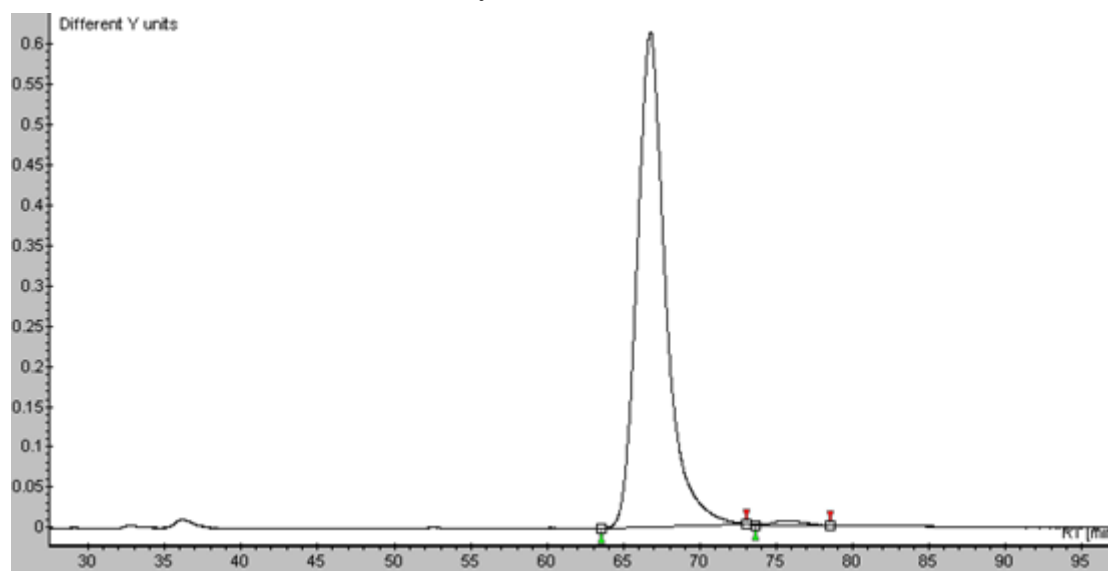

| # | Start [Min] | Time [Min] | End [Min] | Area [%] |
|---|-------------|------------|-----------|----------|
| 1 | 63.588      | 66.776     | 73.049    | 98.981   |
| 2 | 73.646      | 75.746     | 78.504    | 1.019    |



## Compound 6g

### Racemic adduct

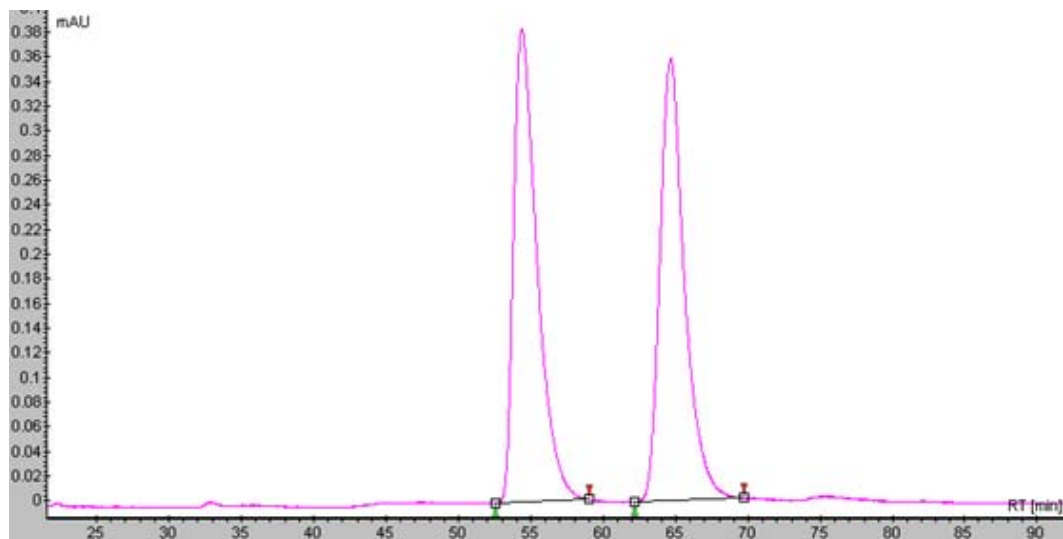

| # | Start [Min] | Time [Min] | End [Min] | Area [%] |
|---|-------------|------------|-----------|----------|
| 1 | 52.545      | 54.380     | 59.005    | 50.518   |
| 2 | 62.164      | 64.697     | 69.773    | 49.482   |

### Asymmetric adduct

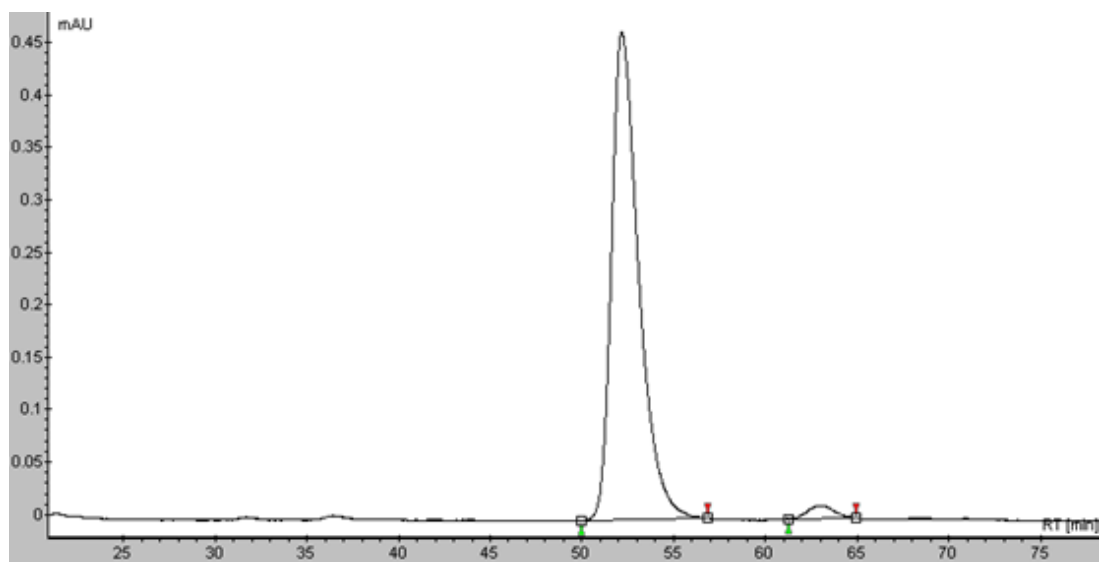

| # | Start [Min] | Time [Min] | End [Min] | Area [%] |
|---|-------------|------------|-----------|----------|
| 1 | 49.969      | 52.155     | 56.857    | 97.414   |
| 2 | 61.231      | 63.017     | 64.948    | 2.586    |

## Compound 6h

### Racemic adduct

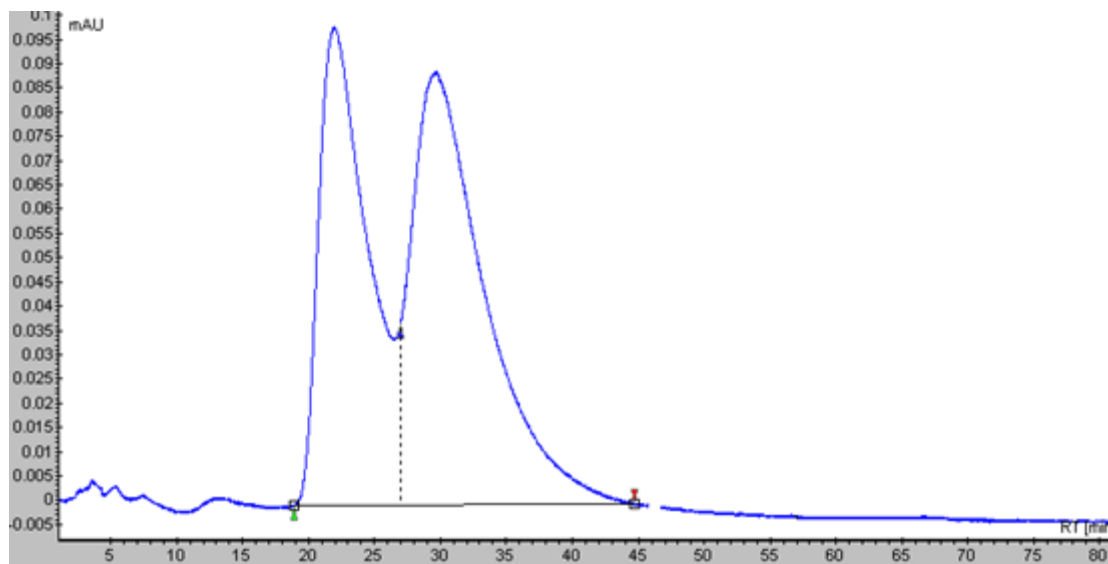

| # | Start [Min] | Time [Min] | End [Min] | Area [%] |
|---|-------------|------------|-----------|----------|
| 1 | 18.901      | 21.940     | 26.939    | 42.872   |
| 2 | 26.939      | 29.679     | 44.754    | 57.128   |

### Asymmetric adduct

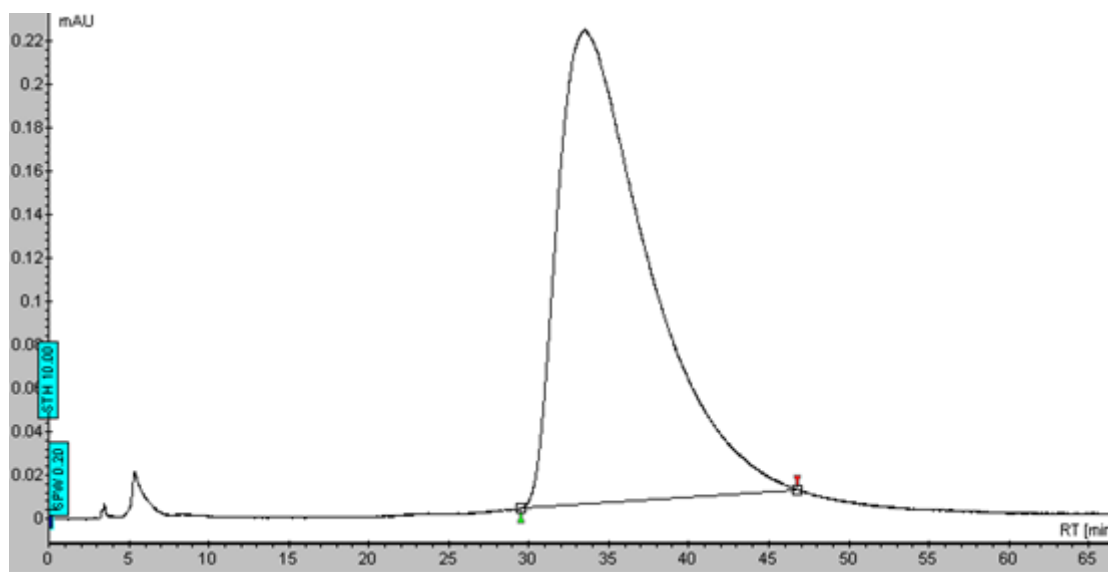

| # | Start [Min] | Time [Min] | End [Min] | Area [%] |
|---|-------------|------------|-----------|----------|
| 1 | 29.505      | 33.481     | 46.779    | 100.000  |

## Compound 6i

### Racemic adduct

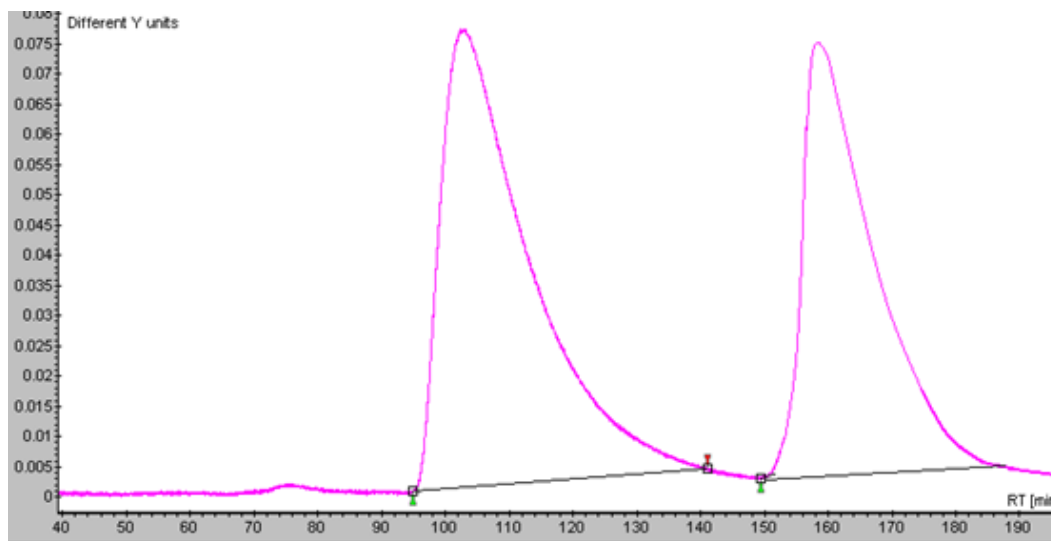

| # | Start [Min] | Time [Min] | End [Min] | Area [%] |
|---|-------------|------------|-----------|----------|
| 2 | 94.894      | 103.091    | 140.977   | 56.657   |
| 1 | 149.430     | 161.769    | 187.606   | 43.343   |

### Asymmetric adduct

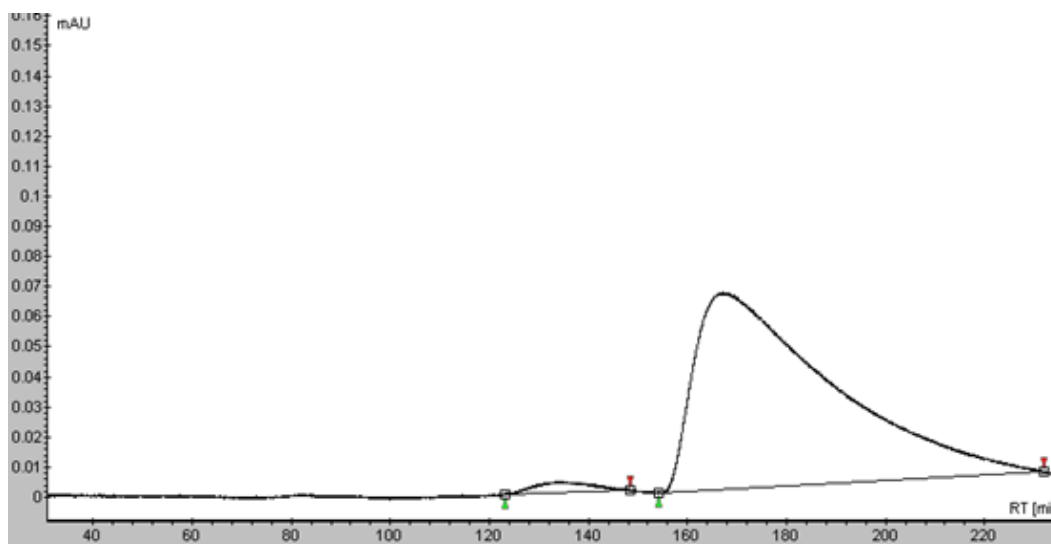

| # | Start [Min] | Time [Min] | End [Min] | Area [%] |
|---|-------------|------------|-----------|----------|
| 1 | 123.052     | 133.223    | 148.454   | 2.302    |
| 2 | 154.062     | 167.151    | 231.918   | 97.698   |

## Compound 6j

### Racemic adduct

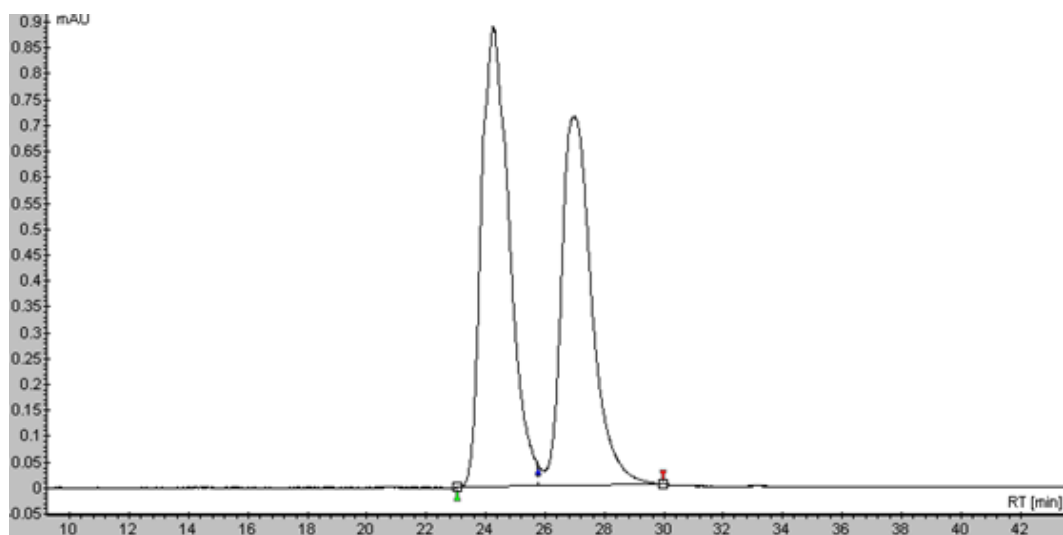

| # | Start [Min] | Time [Min] | End [Min] | Area [%] |
|---|-------------|------------|-----------|----------|
| 1 | 23.047      | 24.252     | 25.776    | 53.417   |
| 2 | 25.776      | 26.998     | 29.961    | 46.583   |

### Asymmetric adduct

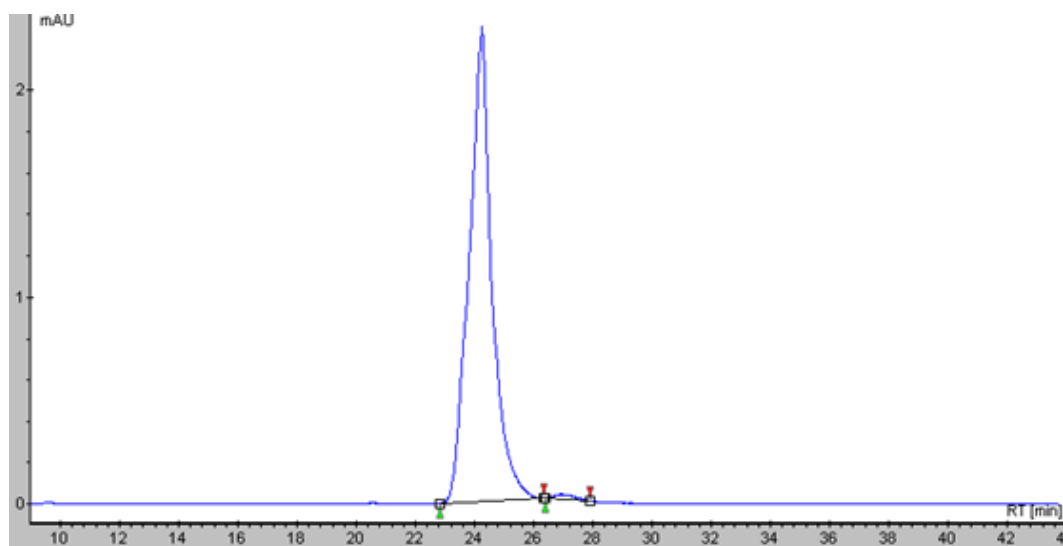

| # | Start [Min] | Time [Min] | End [Min] | Area [%] |
|---|-------------|------------|-----------|----------|
| 1 | 22.832      | 24.238     | 26.328    | 99.064   |
| 2 | 26.408      | 26.985     | 27.918    | 0.936    |

## Compound 6k

### Racemic adduct

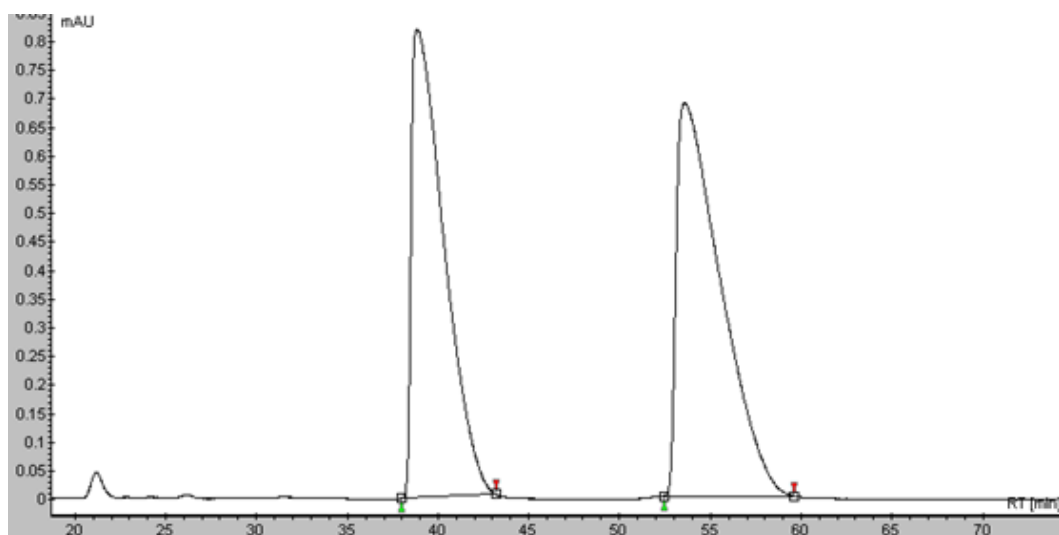

| # | Start [Min] | Time [Min] | End [Min] | Area [%] |
|---|-------------|------------|-----------|----------|
| 1 | 37.996      | 38.799     | 43.158    | 46.765   |
| 2 | 52.451      | 53.581     | 59.575    | 53.235   |

### Asymmetric adduct

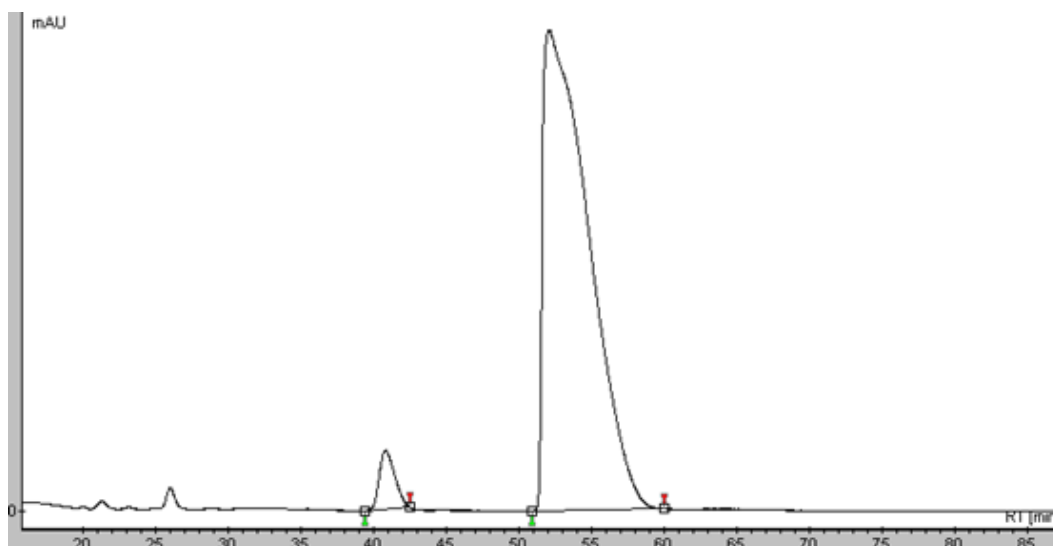

| # | Start [Min] | Time [Min] | End [Min] | Area [%] |
|---|-------------|------------|-----------|----------|
| 1 | 39.410      | 40.799     | 42.483    | 3.984    |
| 2 | 50.899      | 52.021     | 59.983    | 96.016   |

## Compound 6l

### Racemic adduct

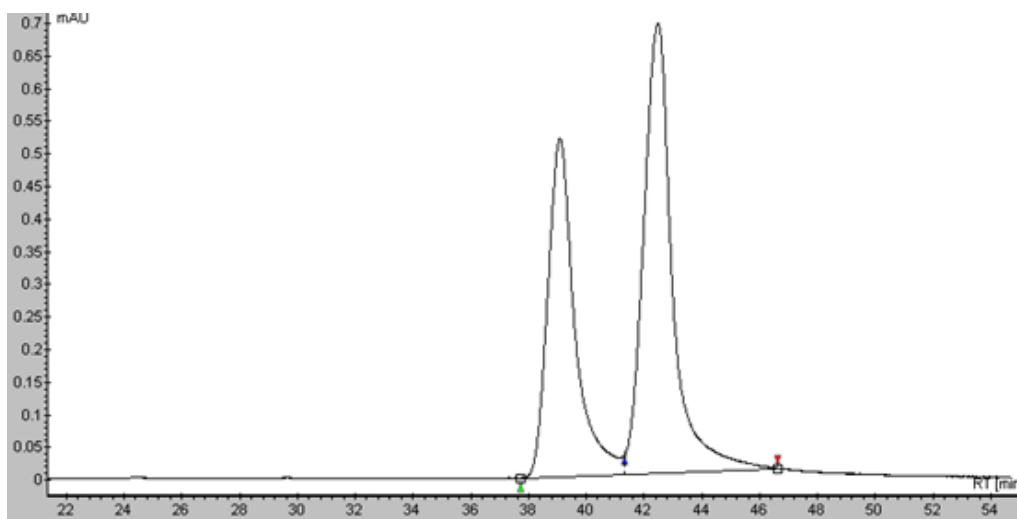

| # | Start [Min] | Time [Min] | End [Min] | Area [%] |
|---|-------------|------------|-----------|----------|
| 1 | 37.725      | 39.077     | 41.317    | 41.494   |
| 2 | 41.317      | 42.464     | 46.642    | 58.506   |

### Asymmetric adduct

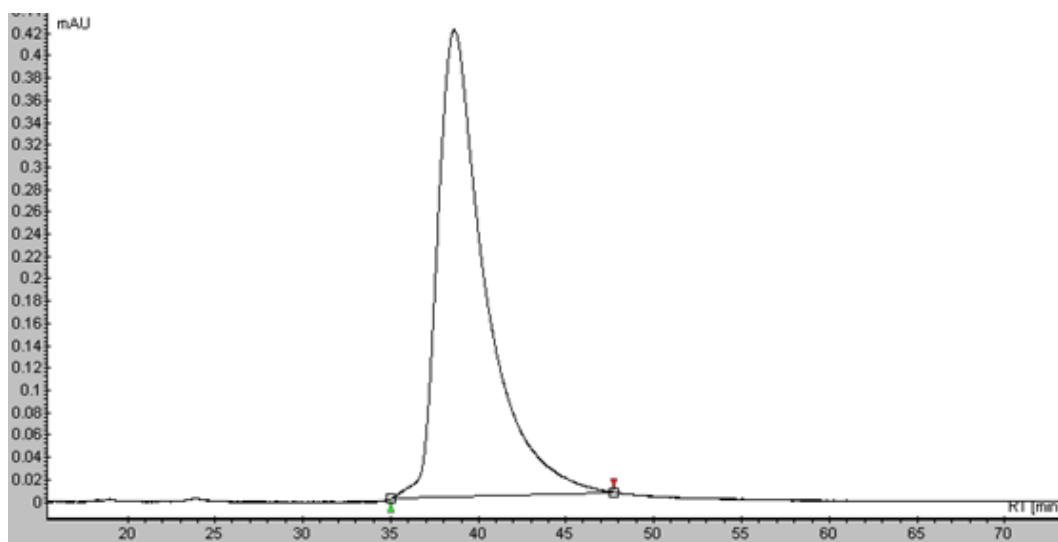

| # | Start [Min] | Time [Min] | End [Min] | Area [%] |
|---|-------------|------------|-----------|----------|
| 1 | 34.979      | 38.653     | 47.719    | 100.000  |

**Compound 6m****Racemic adduct**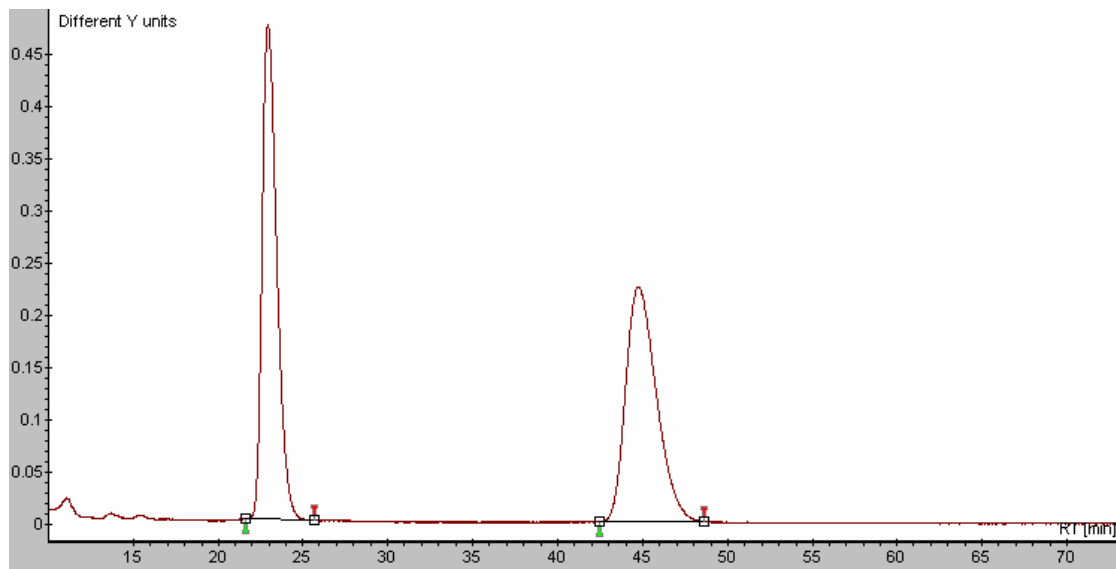

| # | Start [Min] | Time [Min] | End [Min] | Area [%] |
|---|-------------|------------|-----------|----------|
| 1 | 21.626      | 22.952     | 25.671    | 50.101   |
| 2 | 42.464      | 44.731     | 48.619    | 49.899   |

**Asymmetric adduct**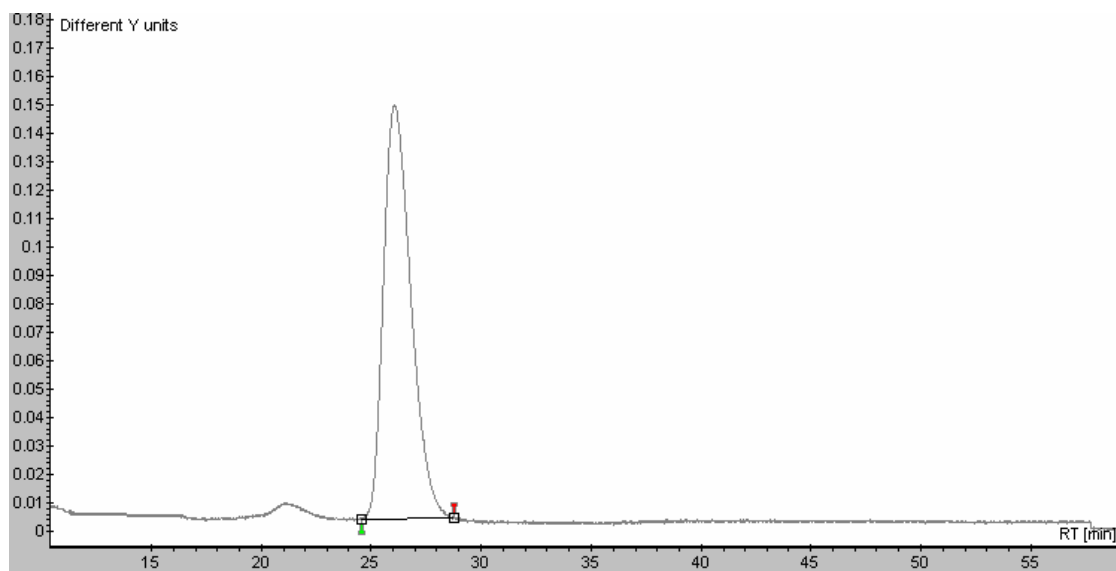

| # | Start [Min] | Time [Min] | End [Min] | Area [%] |
|---|-------------|------------|-----------|----------|
| 1 | 24.561      | 26.057     | 28.764    | 100.000  |

## Compound 6n

### Racemic adduct

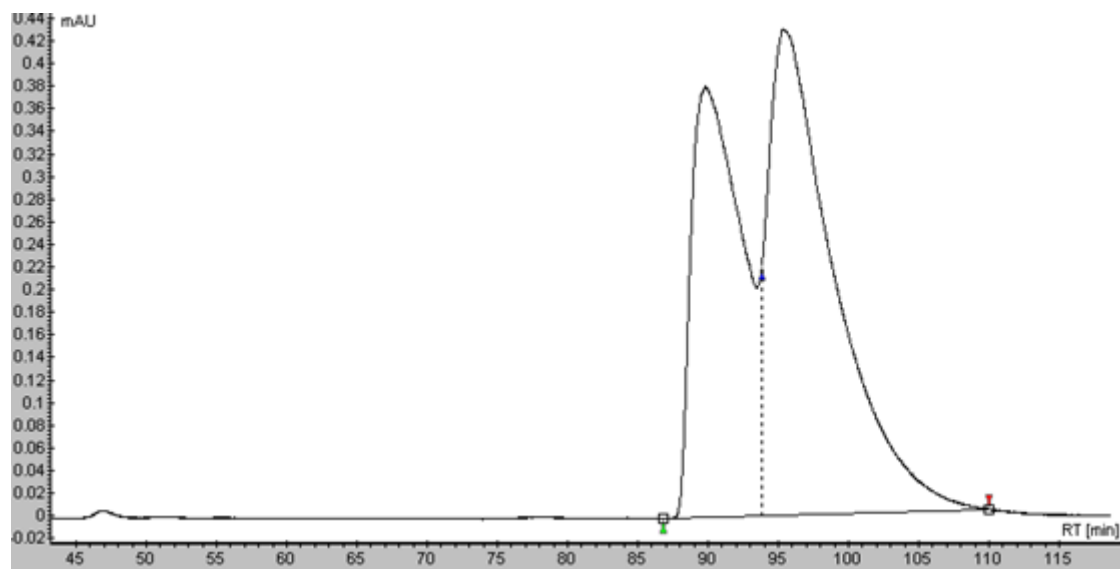

| # | Start [Min] | Time [Min] | End [Min] | Area [%] |
|---|-------------|------------|-----------|----------|
| 1 | 86.798      | 89.781     | 93.742    | 40.233   |
| 2 | 93.742      | 95.312     | 109.944   | 59.767   |

### Asymmetric adduct

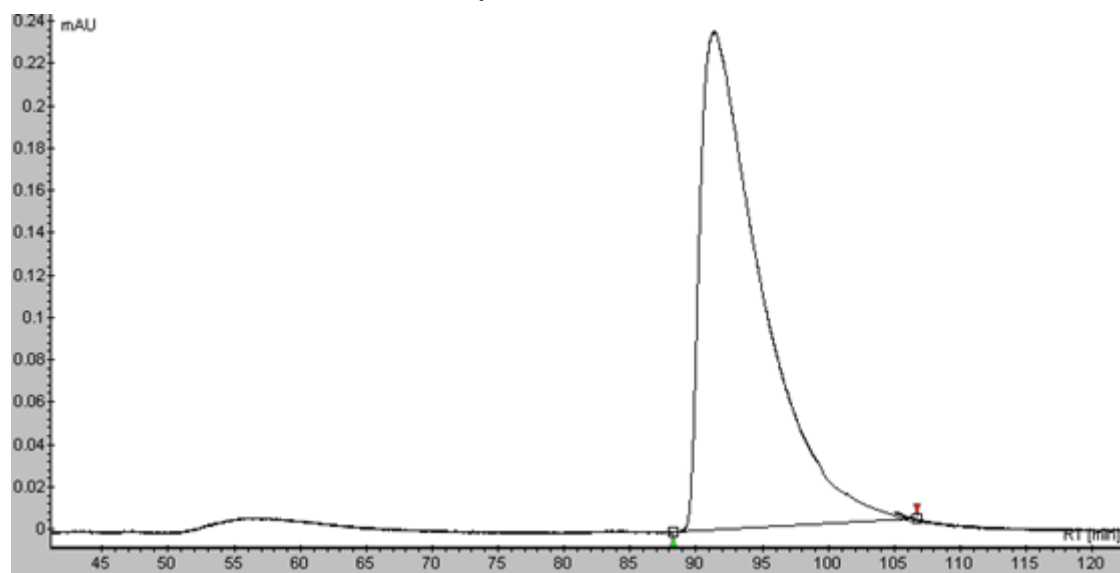

| # | Start [Min] | Time [Min] | End [Min] | Area [%] |
|---|-------------|------------|-----------|----------|
| 1 | 88.215      | 91.434     | 106.714   | 100.000  |



## Compound 6o

### Racemic adduct

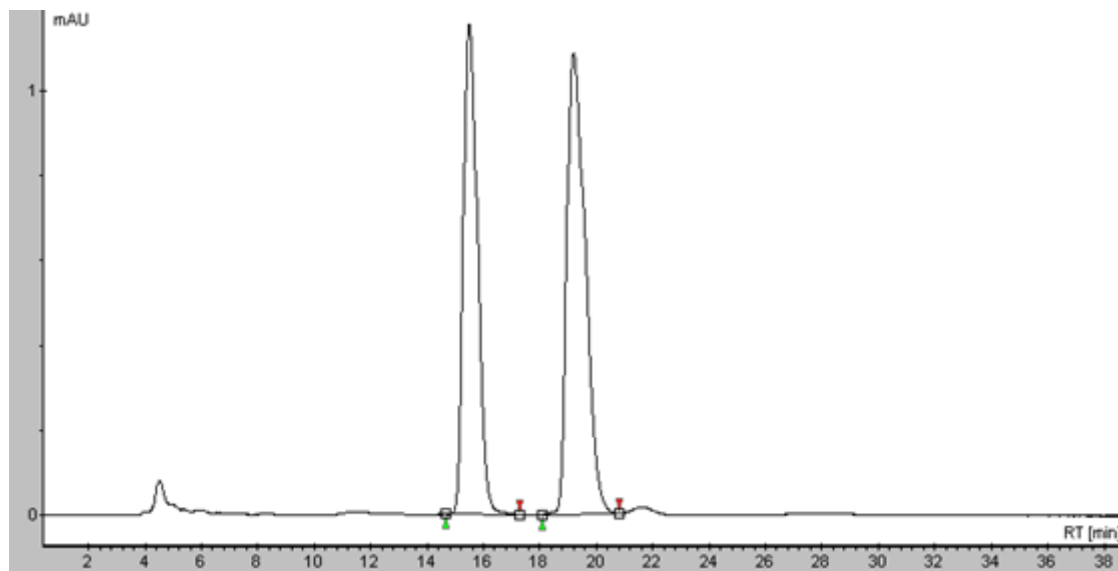

| # | Start [Min] | Time [Min] | End [Min] | Area [%] |
|---|-------------|------------|-----------|----------|
| 1 | 14.686      | 15.488     | 17.284    | 45.173   |
| 2 | 18.076      | 19.206     | 20.801    | 54.827   |

### Asymmetric adduct

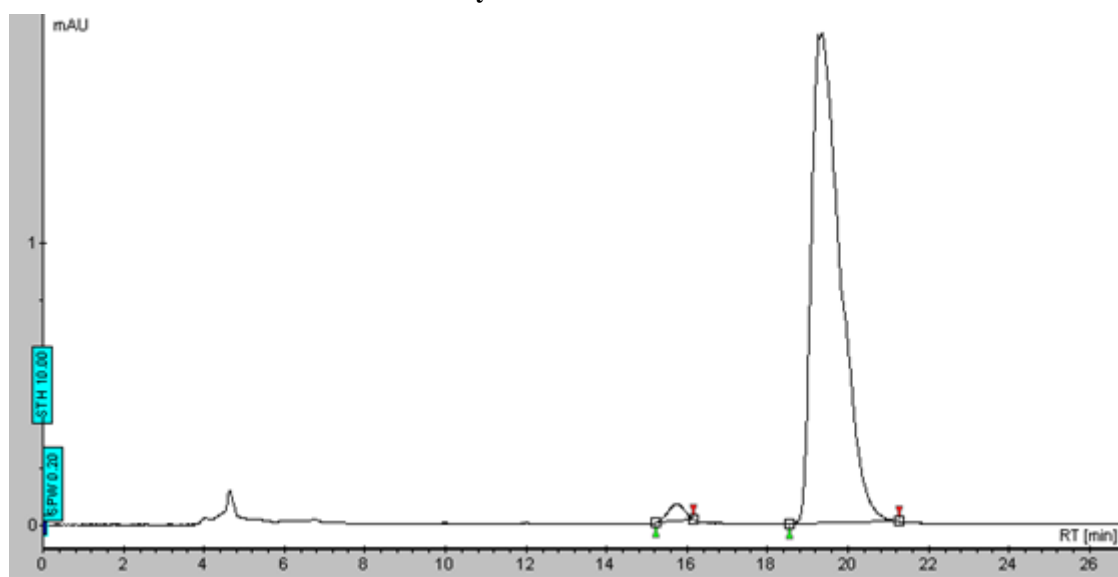

| # | Start [Min] | Time [Min] | End [Min] | Area [%] |
|---|-------------|------------|-----------|----------|
| 1 | 15.221      | 15.732     | 16.154    | 1.959    |
| 2 | 18.542      | 19.345     | 21.265    | 98.041   |

## Compound 6p

### Racemic adduct

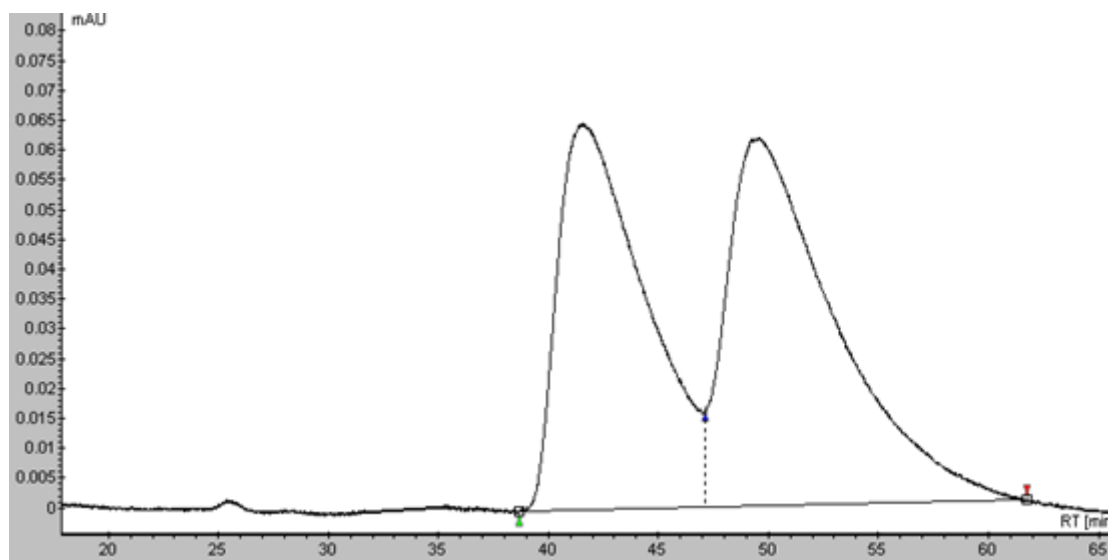

| # | Start [Min] | Time [Min] | End [Min] | Area [%] |
|---|-------------|------------|-----------|----------|
| 1 | 38.705      | 41.558     | 47.143    | 45.773   |
| 2 | 47.143      | 49.556     | 61.726    | 54.227   |

### Asymmetric adduct

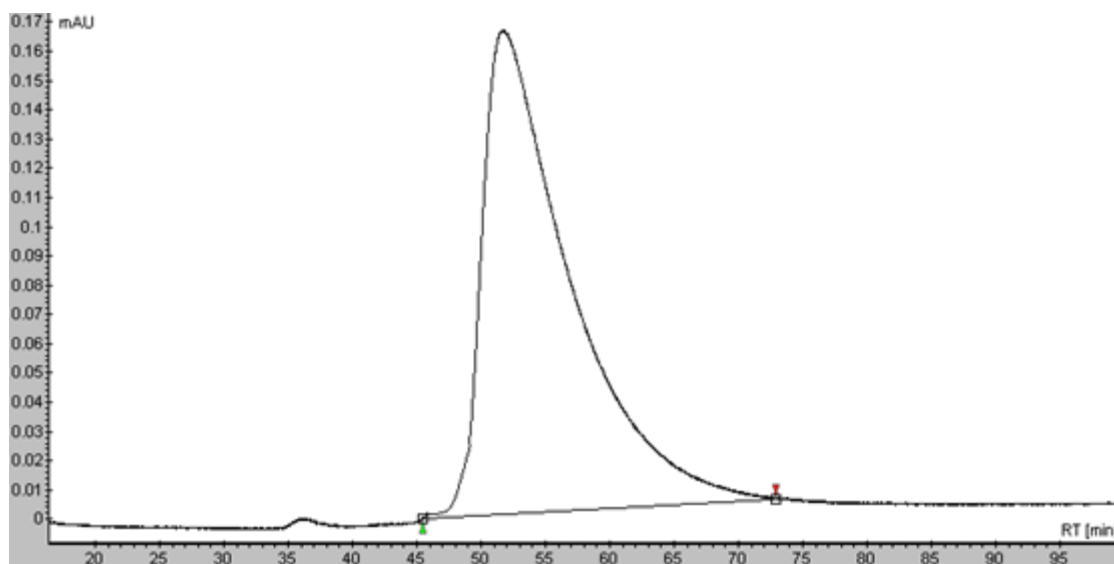

| # | Start [Min] | Time [Min] | End [Min] | Area [%] |
|---|-------------|------------|-----------|----------|
| 1 | 45.525      | 51.768     | 72.931    | 100.000  |

## Compound 6q

### Racemic adduct

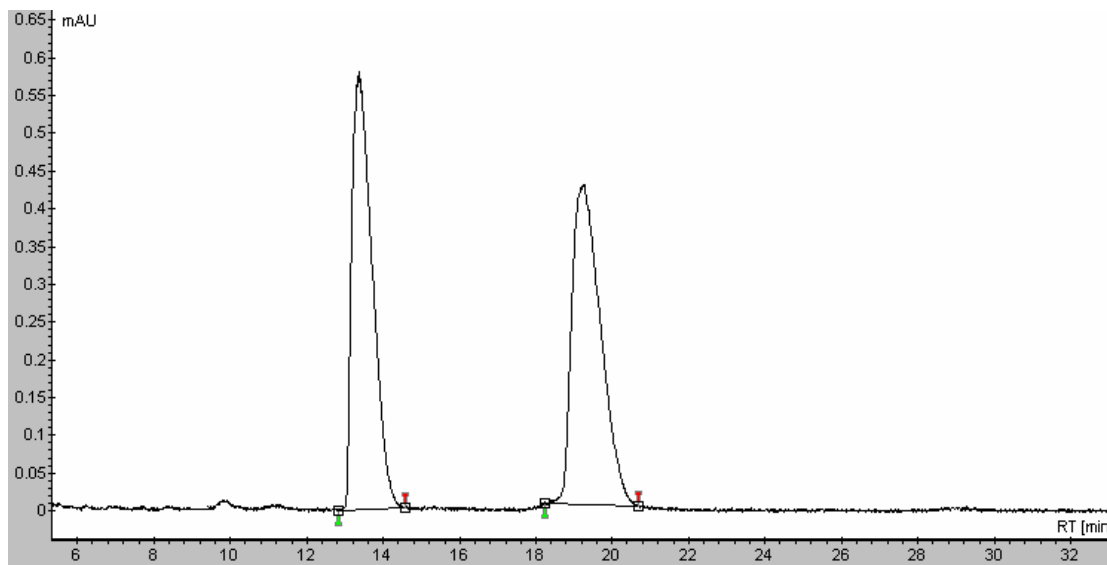

| # | Start [Min] | Time [Min] | End [Min] | Area [%] |
|---|-------------|------------|-----------|----------|
| 1 | 12.833      | 13.359     | 14.581    | 49.080   |
| 2 | 18.233      | 19.252     | 20.681    | 50.920   |

### Asymmetric adduct

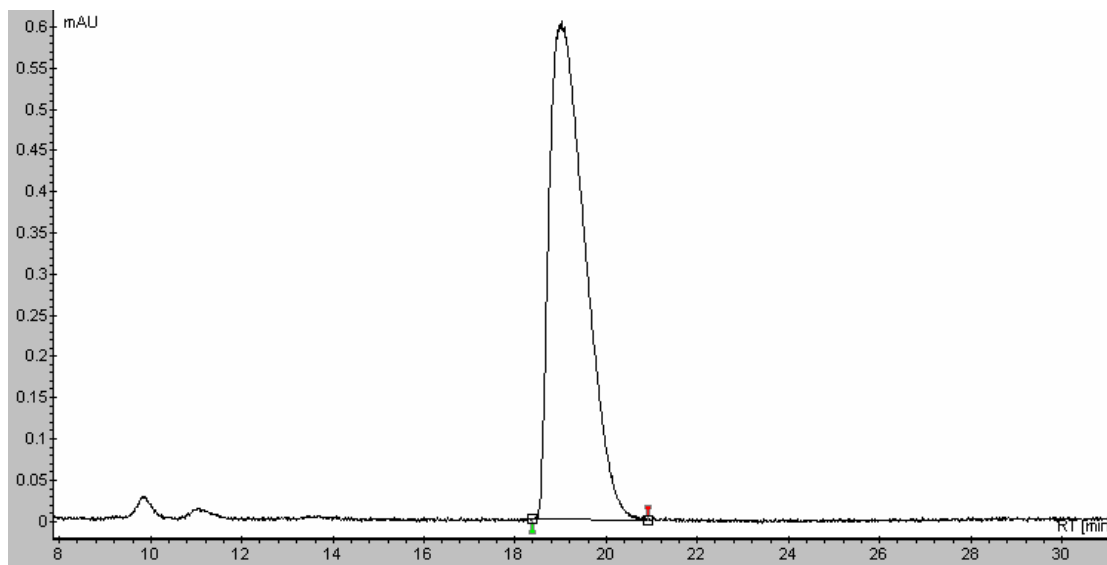

| # | Start [Min] | Time [Min] | End [Min] | Area [%] |
|---|-------------|------------|-----------|----------|
| 1 | 18.363      | 19.025     | 20.910    | 100.000  |

## Compound 6r

### Racemic adduct

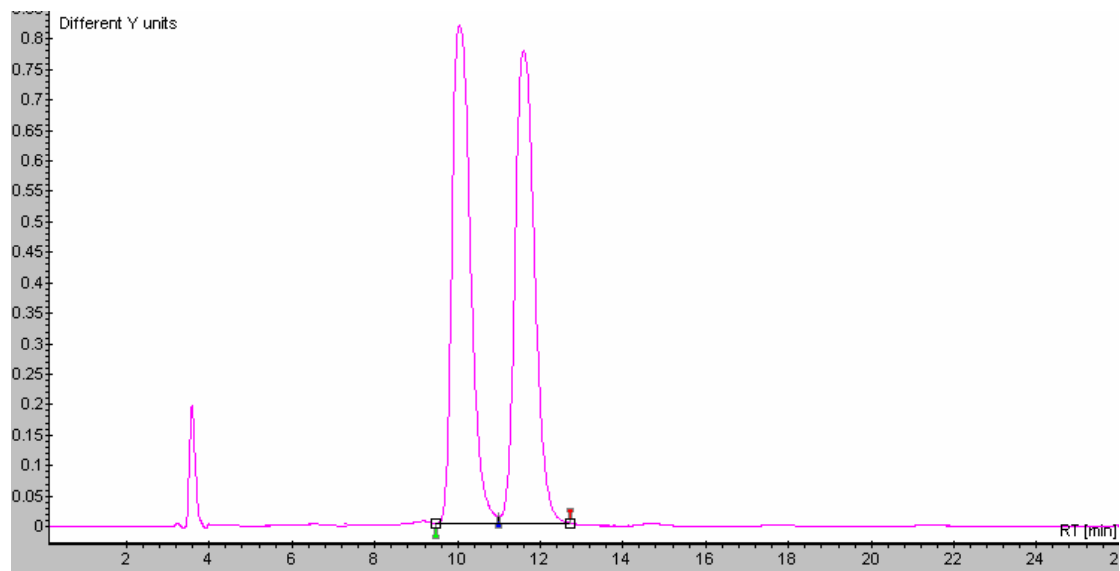

| # | Start [Min] | Time [Min] | End [Min] | Area [%] |
|---|-------------|------------|-----------|----------|
| 1 | 9.477       | 10.039     | 10.998    | 49.941   |
| 2 | 10.998      | 11.586     | 12.717    | 50.059   |

### Asymmetric adduct

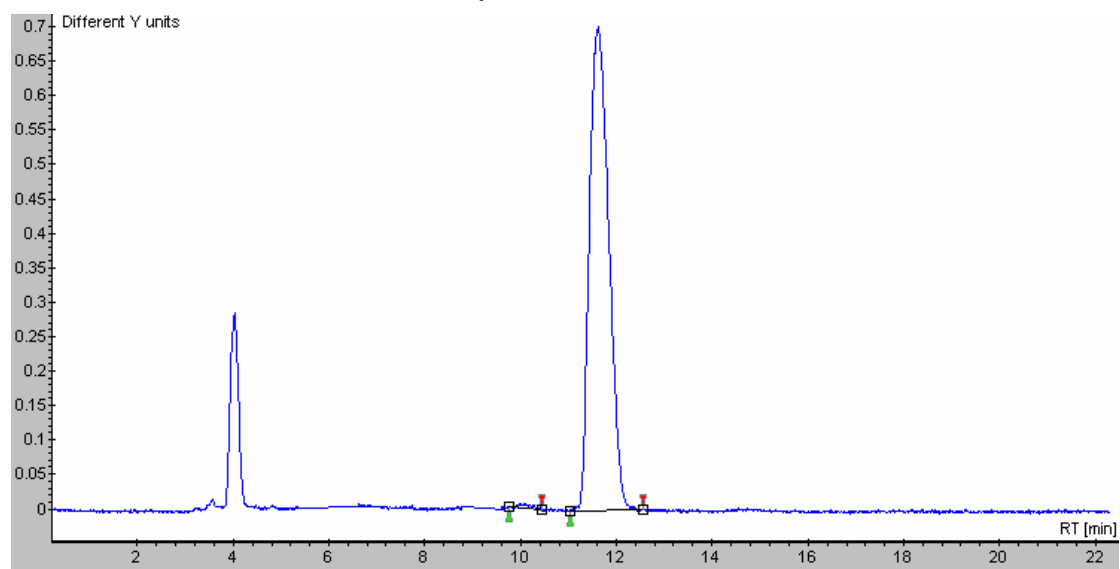

| # | Start [Min] | Time [Min] | End [Min] | Area [%] |
|---|-------------|------------|-----------|----------|
| 1 | 9.748       | 10.106     | 10.438    | 0.707    |
| 2 | 11.037      | 11.612     | 12.554    | 99.293   |

## Compound 6s

### Racemic adduct

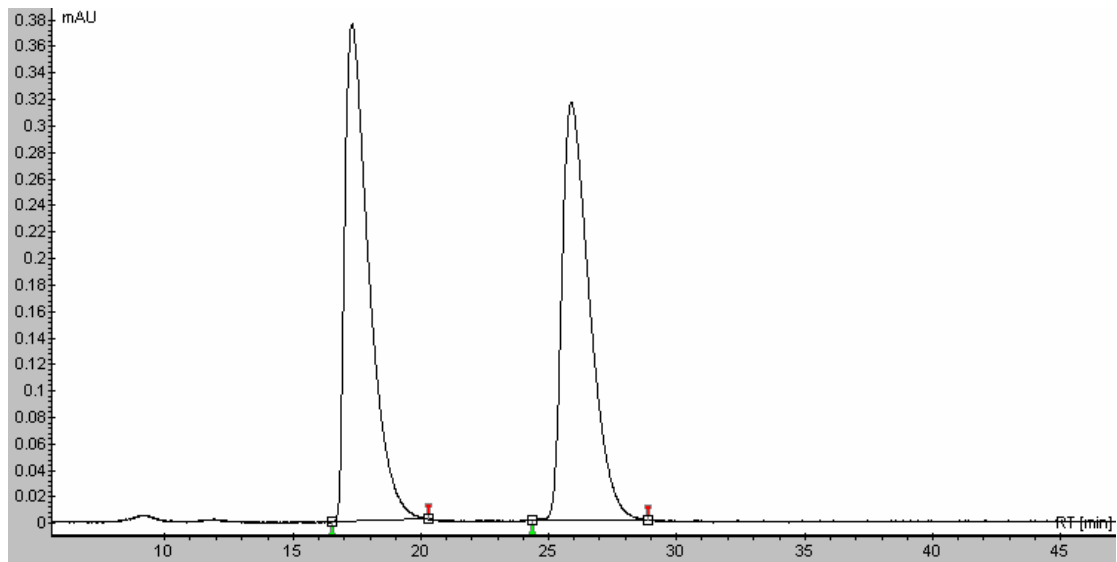

| # | Start [Min] | Time [Min] | End [Min] | Area % [%] |
|---|-------------|------------|-----------|------------|
| 1 | 16.522      | 17.319     | 20.286    | 50.997     |
| 2 | 24.330      | 25.878     | 28.861    | 49.003     |

### Asymmetric adduct

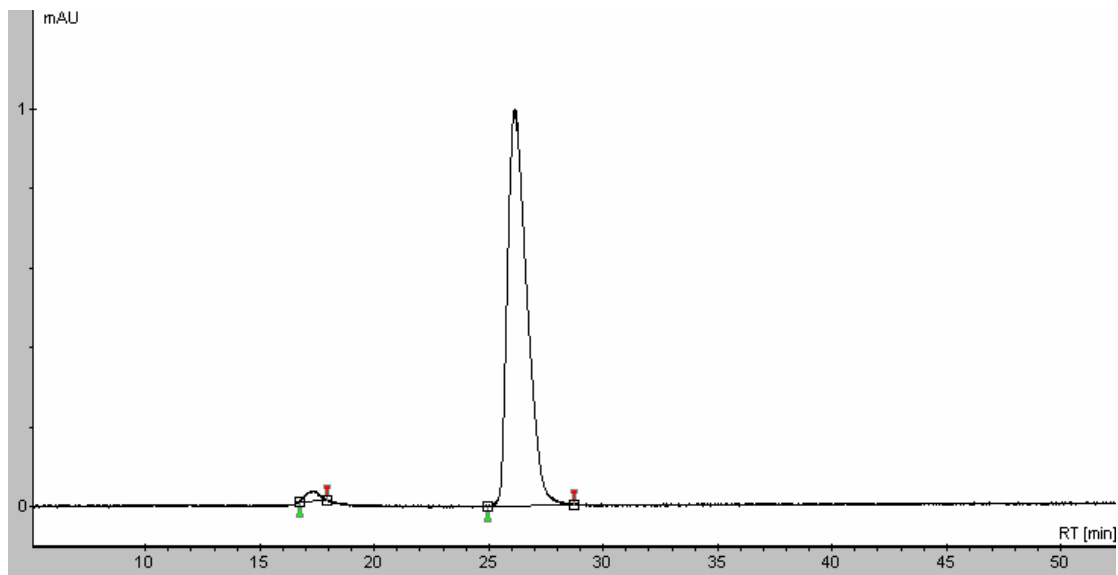

| # | Start [Min] | Time [Min] | End [Min] | Area % [%] |
|---|-------------|------------|-----------|------------|
| 1 | 16.719      | 17.279     | 17.914    | 1.608      |
| 2 | 24.976      | 26.131     | 28.751    | 98.392     |

## Compound 6t

### Racemic adduct

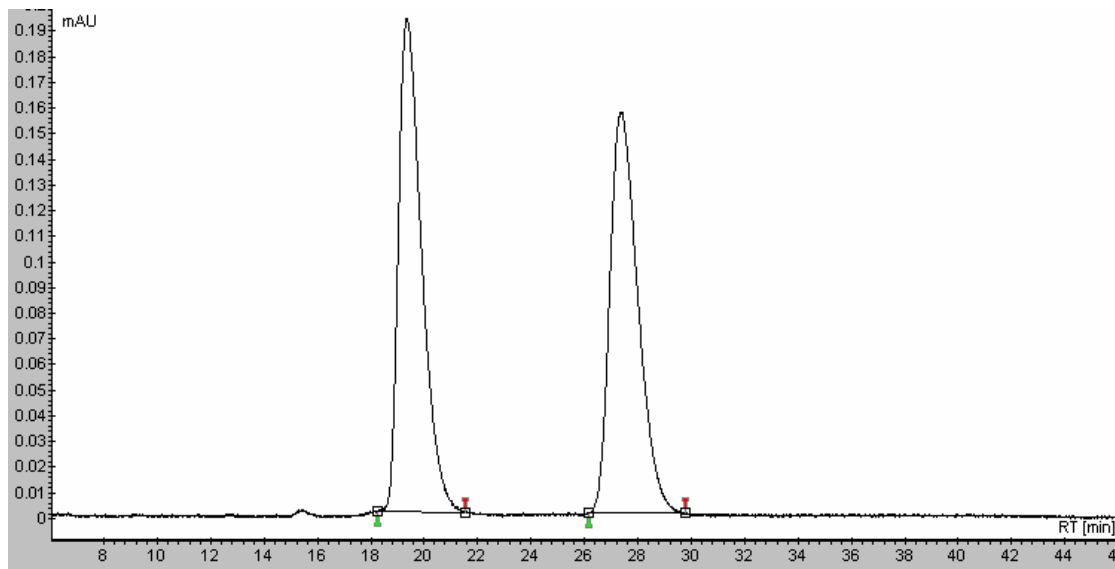

| # | Start [Min] | Time [Min] | End [Min] | Area % [%] |
|---|-------------|------------|-----------|------------|
| 1 | 18.264      | 19.345     | 21.543    | 50.546     |
| 2 | 26.173      | 27.371     | 29.775    | 49.454     |

### Asymmetric adduct

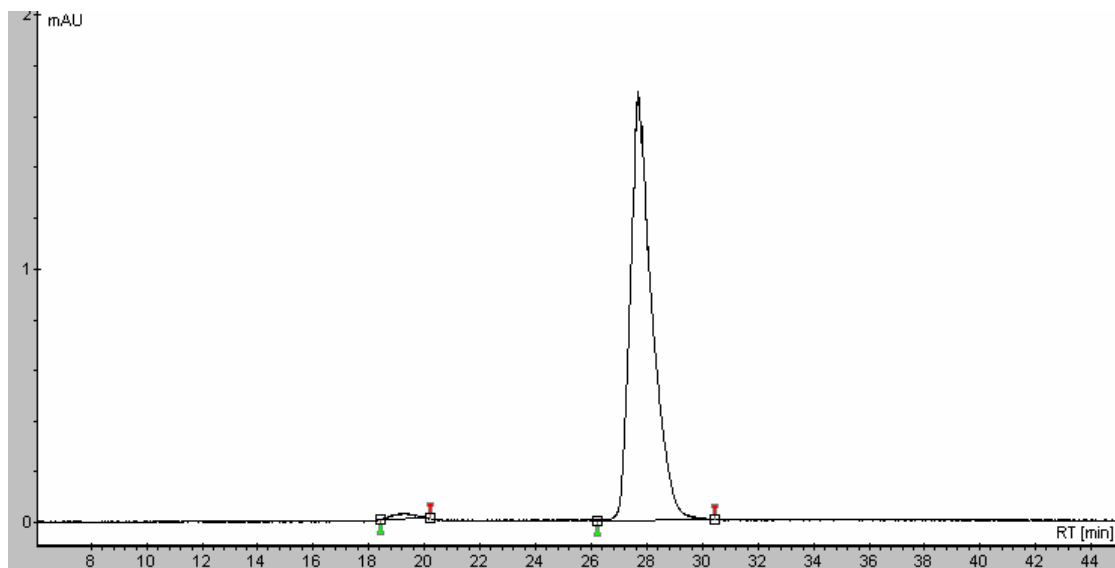

| # | Start [Min] | Time [Min] | End [Min] | Area % [%] |
|---|-------------|------------|-----------|------------|
| 1 | 18.427      | 19.225     | 20.181    | 1.453      |
| 2 | 26.195      | 27.705     | 30.430    | 98.547     |

## Compound 6u

### Racemic adduct

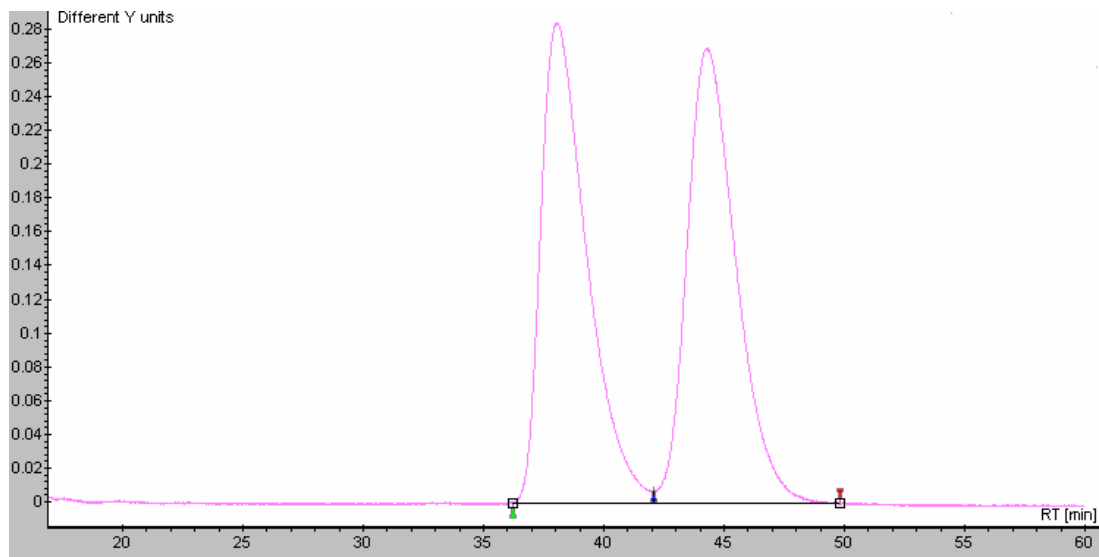

| # | Start [Min] | Time [Min] | End [Min] | Area % [%] |
|---|-------------|------------|-----------|------------|
| 1 | 36.175      | 38.011     | 42.061    | 49.765     |
| 2 | 42.061      | 44.263     | 49.804    | 50.235     |

### Asymmetric adduct

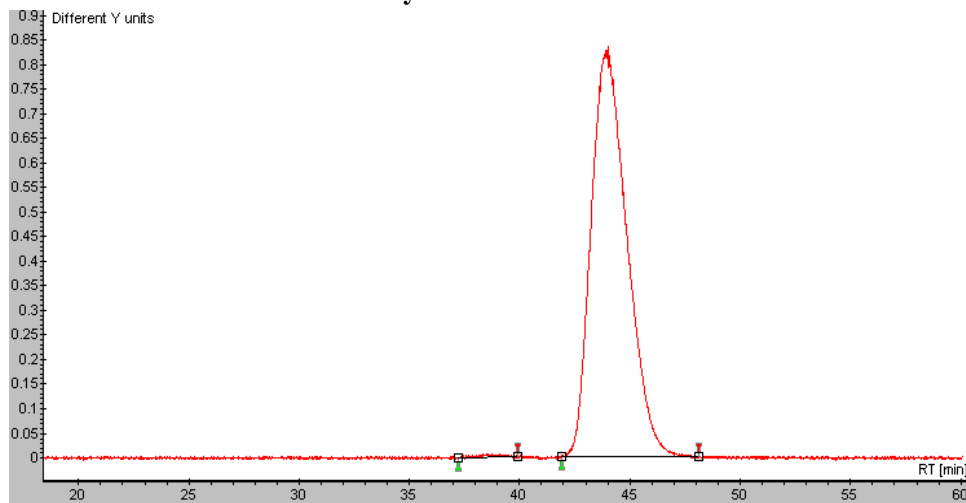

| # | Start [Min] | Time [Min] | End [Min] | Area % [%] |
|---|-------------|------------|-----------|------------|
| 2 | 37.227      | 38.491     | 39.918    | 0.455      |
| 1 | 41.913      | 44.023     | 48.104    | 99.545     |
